# Supplementary material for: Construction of circRNA-Associated ceRNA Network Reveals Novel Biomarkers for Esophageal Cancer
Source: Comput Math Methods Med. 2020 Aug 28;2020:7958362. doi: 10.1155/2020/7958362 (PMC7474783; doi:10.1155/2020/7958362)
Supplement: Supplementary Materials — Supplementary Table 1: the different expressed circRNAs in ESCC. [file 7958362.f1.xlsx]

## Sheet: count
circRNA_ID	C1	C2	C3	N1	N2	N3	Location	Source_Gene
hsa_circ_0000001	0	0	0	0	2	0	10:100915999..100926019:+	ENSG00000119906
hsa_circ_0000002	2	6	0	12	12	14	10:101667886..101676436:-	ENSG00000107829
hsa_circ_0000003	0	0	0	0	0	4	10:101672915..101676436:-	ENSG00000107829
hsa_circ_0000004	0	0	0	0	2	2	10:101792839..101810314:-	ENSG00000198408
hsa_circ_0000005	0	0	0	3	0	0	10:101792839..101813606:-	ENSG00000198408
hsa_circ_0000006	0	0	0	0	2	0	10:101797980..101800400:-	ENSG00000198408
hsa_circ_0000007	0	0	0	0	0	6	10:101798842..101810314:-	ENSG00000198408
hsa_circ_0000008	0	0	0	2	0	0	10:101806045..101807901:-	ENSG00000198408
hsa_circ_0000009	0	0	0	0	0	2	10:101889412..101957732:-	ENSG00000120029
hsa_circ_0000010	0	0	0	0	4	0	10:102157019..102158214:+	ENSG00000166197
hsa_circ_0000011	0	0	0	3	0	0	10:103438015..103438808:+	ENSG00000148843
hsa_circ_0000012	0	0	0	0	2	0	10:103439746..103440850:+	ENSG00000148843
hsa_circ_0000013	0	0	0	2	7	3	10:103622470..103661114:-	ENSG00000107957
hsa_circ_0000014	0	0	0	0	4	0	10:104008177..104018908:+	ENSG00000065613
hsa_circ_0000015	0	0	0	3	0	0	10:1072116..1096246:+	ENSG00000047056
hsa_circ_0000016	0	0	0	4	0	0	10:1077907..1125024:+	ENSG00000047056
hsa_circ_0000017	0	0	0	0	0	5	10:1084403..1086357:+	ENSG00000047056
hsa_circ_0000018	0	0	0	2	0	0	10:1103599..1105267:+	ENSG00000047056
hsa_circ_0000019	0	0	0	4	2	2	10:110596398..110598290:+	ENSG00000108055
hsa_circ_0000020	0	0	0	0	3	0	10:110881233..110890670:+	ENSG00000150593
hsa_circ_0000021	0	2	0	5	8	5	10:110964125..110985765:+	ENSG00000108061
hsa_circ_0000022	0	0	0	6	0	0	10:113624826..113626145:-	ENSG00000197893
hsa_circ_0000023	0	0	0	5	0	0	10:114487958..114491878:-	ENSG00000099204
hsa_circ_0000024	0	2	0	0	0	0	10:114951094..114974385:+	ENSG00000165832
hsa_circ_0000025	0	4	0	0	4	0	10:114970368..114974385:+	ENSG00000165832
hsa_circ_0000026	0	0	0	0	2	0	10:115120185..115171292:+	ENSG00000107518
hsa_circ_0000027	0	0	0	0	3	0	10:115461941..115469329:+	ENSG00000107518
hsa_circ_0000028	0	0	0	2	0	0	10:118701306..118730410:-	ENSG00000151893
hsa_circ_0000029	0	2	0	0	0	0	10:11997672..12014184:-	ENSG00000151461
hsa_circ_0000030	0	3	0	0	0	0	10:12081472..12091684:+	ENSG00000181192
hsa_circ_0000031	0	5	2	0	0	0	10:12081472..12094271:+	ENSG00000181192
hsa_circ_0000032	0	6	0	2	0	0	10:12081472..12120267:+	ENSG00000181192
hsa_circ_0000033	0	0	0	0	0	2	10:121487354..121488113:-	ENSG00000066468
hsa_circ_0000034	0	0	0	0	3	0	10:121538592..121564579:-	ENSG00000066468
hsa_circ_0000035	0	0	0	0	4	0	10:121538592..121565704:-	ENSG00000066468
hsa_circ_0000036	0	0	0	0	0	3	10:121564502..121565704:-	ENSG00000066468
hsa_circ_0000037	0	0	0	0	2	0	10:121959324..121961517:-	ENSG00000107672
hsa_circ_0000038	0	0	0	0	0	6	10:123766078..123767152:-	ENSG00000121898
hsa_circ_0000039	0	0	0	2	3	2	10:12400016..12403369:+	Null
hsa_circ_0000040	0	0	0	4	4	0	10:124038515..124046724:-	ENSG00000182022
hsa_circ_0000041	2	0	0	9	15	11	10:124681607..124682379:-	ENSG00000189319,ENSG00000258539
hsa_circ_0000042	0	0	0	2	2	0	10:124681607..124696212:-	ENSG00000189319,ENSG00000258539
hsa_circ_0000043	0	2	0	4	0	0	10:124942457..124943307:+	ENSG00000019995
hsa_circ_0000044	0	0	0	2	0	0	10:125038997..125111093:-	ENSG00000175029
hsa_circ_0000045	0	0	0	2	0	0	10:125110990..125133612:-	Null
hsa_circ_0000046	0	0	0	0	0	2	10:125143613..125143772:+	Null
hsa_circ_0000047	0	0	0	0	5	0	10:126970702..126990603:+	ENSG00000150760
hsa_circ_0000048	0	0	0	2	5	2	10:126970702..127000307:+	ENSG00000150760
hsa_circ_0000049	0	0	0	4	0	0	10:126970702..127061776:+	ENSG00000150760
hsa_circ_0000050	0	9	2	4	6	6	10:126970702..127127764:+	ENSG00000150760
hsa_circ_0000051	0	0	0	0	2	0	10:127061668..127110354:+	ENSG00000150760
hsa_circ_0000052	0	0	0	0	2	0	10:132690392..132710456:+	ENSG00000068383
hsa_circ_0000053	0	0	0	0	2	0	10:13659323..13663509:-	ENSG00000151474
hsa_circ_0000054	0	0	0	2	2	3	10:15816835..15847943:-	ENSG00000148481
hsa_circ_0000055	0	0	0	0	3	2	10:15821656..15847943:-	ENSG00000148481
hsa_circ_0000056	0	4	0	0	2	3	10:15833630..15847943:-	ENSG00000148481
hsa_circ_0000057	0	0	0	0	0	2	10:17229320..17230710:+	ENSG00000026025
hsa_circ_0000058	0	0	0	0	0	5	10:17603560..17604047:-	ENSG00000165996
hsa_circ_0000059	0	0	0	0	4	0	10:17704431..17705741:+	ENSG00000136738
hsa_circ_0000060	0	3	0	4	0	0	10:179994..221356:+	ENSG00000015171
hsa_circ_0000061	0	0	0	3	0	0	10:18498355..18500948:+	ENSG00000165995
hsa_circ_0000062	0	0	0	0	3	0	10:18527588..18536196:+	ENSG00000165995
hsa_circ_0000063	0	0	0	4	0	0	10:24380869..24384423:+	Null,ENSG00000120549
hsa_circ_0000064	0	0	0	0	4	0	10:263204..263658:-	Null
hsa_circ_0000065	0	2	0	0	0	0	10:27022558..27048979:-	ENSG00000107890
hsa_circ_0000066	0	3	0	0	0	0	10:27037186..27048979:-	ENSG00000107890
hsa_circ_0000067	0	0	0	6	2	0	10:27532507..27533994:+	ENSG00000099246
hsa_circ_0000068	0	0	0	3	0	0	10:28583399..28596041:+	ENSG00000095787
hsa_circ_0000069	0	0	0	0	3	0	10:28589736..28608431:+	ENSG00000095787
hsa_circ_0000070	0	0	0	2	0	0	10:29512735..29524715:-	ENSG00000197321
hsa_circ_0000071	0	0	0	24	21	33	10:29512735..29531288:-	ENSG00000197321
hsa_circ_0000072	0	0	0	2	4	7	10:29512735..29532172:-	ENSG00000197321
hsa_circ_0000073	0	0	0	0	0	3	10:29512735..29533458:-	ENSG00000197321
hsa_circ_0000074	0	0	0	4	0	0	10:29550597..29563292:-	ENSG00000197321
hsa_circ_0000075	0	0	0	4	3	5	10:29550597..29569312:-	ENSG00000197321
hsa_circ_0000076	0	0	0	0	4	0	10:30026103..30029866:-	ENSG00000165757
hsa_circ_0000077	0	0	0	2	0	0	10:3118782..3120044:+	ENSG00000067057
hsa_circ_0000078	0	0	0	5	0	0	10:31373018..31387798:+	ENSG00000148516
hsa_circ_0000079	0	0	0	0	0	3	10:31373018..31461237:+	ENSG00000148516
hsa_circ_0000080	0	0	0	0	0	3	10:31373018..31495838:+	ENSG00000148516
hsa_circ_0000081	0	11	0	9	14	11	10:31908172..31910563:-	ENSG00000165322
hsa_circ_0000082	0	2	0	0	0	0	10:32019858..32021287:-	ENSG00000170759
hsa_circ_0000083	0	2	0	0	5	0	10:32451592..32474023:+	ENSG00000216937
hsa_circ_0000084	0	2	0	5	2	0	10:32451592..32481782:+	Null,ENSG00000216937
hsa_circ_0000085	0	3	0	0	3	0	10:32471064..32474023:+	ENSG00000216937
hsa_circ_0000086	0	0	0	0	0	3	10:325394..327176:-	ENSG00000151240
hsa_circ_0000087	0	5	0	6	12	2	10:32543300..32584304:+	ENSG00000216937
hsa_circ_0000088	0	2	0	0	7	0	10:32543300..32623817:+	Null,ENSG00000216937
hsa_circ_0000089	0	3	0	4	5	5	10:32565558..32584304:+	ENSG00000216937
hsa_circ_0000090	0	2	0	0	0	0	10:32911886..32919915:-	ENSG00000150093
hsa_circ_0000091	0	0	0	0	0	2	10:34251602..34336243:-	Null
hsa_circ_0000092	0	3	0	3	3	4	10:34269657..34284245:-	ENSG00000148498
hsa_circ_0000093	0	0	0	0	0	2	10:34347956..34384254:-	ENSG00000148498
hsa_circ_0000094	0	0	0	0	2	6	10:34359147..34384254:-	ENSG00000148498
hsa_circ_0000095	0	2	0	0	0	0	10:34688384..34688622:-	Null
hsa_circ_0000096	0	0	0	0	2	2	10:35516523..35530243:+	ENSG00000108100
hsa_circ_0000097	0	0	0	3	0	0	10:37803833..37838111:-	ENSG00000198105
hsa_circ_0000098	0	0	0	0	0	3	10:43154897..43176032:+	ENSG00000169826
hsa_circ_0000099	0	0	0	0	0	2	10:45457785..45464327:-	ENSG00000165406
hsa_circ_0000100	0	0	0	0	2	0	10:45662580..45663842:-	ENSG00000172671
hsa_circ_0000101	0	0	0	0	2	4	10:45939361..45962994:-	ENSG00000239883
hsa_circ_0000102	0	0	0	4	0	0	10:45975454..45988847:+	ENSG00000265354
hsa_circ_0000103	0	0	0	3	0	0	10:46010223..46011206:-	ENSG00000266412
hsa_circ_0000104	0	0	0	0	5	0	10:4830675..4908420:+	Null
hsa_circ_0000105	0	3	3	0	0	0	10:4830675..4909606:+	Null
hsa_circ_0000106	0	0	0	0	5	0	10:48401612..48410168:+	ENSG00000107643
hsa_circ_0000107	0	5	0	5	5	3	10:49915917..49935142:-	ENSG00000227345
hsa_circ_0000108	0	0	0	3	0	0	10:5096410..5196951:+	Null
hsa_circ_0000109	0	4	0	6	6	0	10:5699525..5714207:+	ENSG00000108021
hsa_circ_0000110	0	2	0	0	0	0	10:5773842..5800705:-	ENSG00000057608
hsa_circ_0000111	0	5	0	0	3	0	10:5785142..5800705:-	ENSG00000057608
hsa_circ_0000112	0	3	0	2	4	3	10:5794885..5800705:-	ENSG00000057608
hsa_circ_0000113	0	0	0	2	0	0	10:60084602..60085253:-	ENSG00000151150
hsa_circ_0000114	0	2	0	0	0	0	10:60234688..60279639:-	ENSG00000151150
hsa_circ_0000115	0	0	0	0	2	0	10:67932597..68014186:-	ENSG00000148634
hsa_circ_0000116	0	0	0	0	2	0	10:67939588..67941105:-	ENSG00000148634
hsa_circ_0000117	0	0	0	4	3	3	10:67954595..68014186:-	ENSG00000148634
hsa_circ_0000118	0	0	0	0	4	2	10:67966683..68014186:-	ENSG00000148634
hsa_circ_0000119	0	0	0	0	4	0	10:67988663..68014186:-	ENSG00000148634
hsa_circ_0000120	0	0	0	0	4	0	10:68025546..68044563:-	ENSG00000148634
hsa_circ_0000121	0	0	0	0	2	0	10:68341660..68342031:+	ENSG00000096746
hsa_circ_0000122	0	0	0	2	0	0	10:68487144..68506718:-	ENSG00000122912
hsa_circ_0000123	0	0	0	3	5	3	10:68644698..68647005:+	ENSG00000138336
hsa_circ_0000124	0	0	0	0	0	2	10:68644698..68652594:+	ENSG00000138336
hsa_circ_0000125	0	0	0	0	2	3	10:68959806..68960249:+	ENSG00000165732
hsa_circ_0000126	0	0	0	0	0	2	10:69483691..69485215:+	ENSG00000099282
hsa_circ_0000127	0	0	0	0	3	0	10:70152263..70161069:-	ENSG00000079332
hsa_circ_0000128	0	0	0	0	0	2	10:70152263..70161931:-	ENSG00000079332
hsa_circ_0000129	0	0	0	0	3	0	10:70844473..70859499:+	ENSG00000166224
hsa_circ_0000130	0	0	0	0	5	0	10:7220411..7285954:-	ENSG00000198879
hsa_circ_0000131	0	0	0	0	3	0	10:7227855..7285954:-	ENSG00000198879
hsa_circ_0000132	0	0	0	0	2	2	10:72340789..72341170:-	ENSG00000148719
hsa_circ_0000133	0	0	0	0	6	5	10:7243558..7285954:-	ENSG00000198879
hsa_circ_0000134	0	0	0	0	4	0	10:72708283..72715902:+	ENSG00000156026
hsa_circ_0000135	0	0	0	2	0	0	10:72715111..72715902:+	ENSG00000156026
hsa_circ_0000136	0	0	4	7	7	5	10:7276892..7285954:-	ENSG00000198879
hsa_circ_0000137	0	0	0	2	0	0	10:73086185..73087000:-	Null
hsa_circ_0000138	0	0	0	4	0	0	10:73396519..73400857:-	ENSG00000138279
hsa_circ_0000139	0	0	0	0	2	0	10:7367649..7370375:-	ENSG00000198879
hsa_circ_0000140	0	0	0	0	2	0	10:7367649..7381949:-	ENSG00000198879
hsa_circ_0000141	0	0	0	2	2	0	10:73817015..73824084:-	ENSG00000148660,Null
hsa_circ_0000142	0	0	0	2	2	3	10:73817023..73824084:-	ENSG00000148660
hsa_circ_0000143	0	0	0	0	2	0	10:74070670..74074903:+	ENSG00000035403
hsa_circ_0000144	0	0	0	4	0	0	10:76036008..76058783:+	ENSG00000148655
hsa_circ_0000145	0	0	0	2	0	2	10:76944773..76970067:-	ENSG00000156113
hsa_circ_0000146	0	0	0	2	0	0	10:76969974..77079550:-	ENSG00000156113
hsa_circ_0000147	0	0	0	3	2	3	10:77853354..77854370:-	ENSG00000151208
hsa_circ_0000148	0	8	3	13	11	10	10:7797047..7802854:+	ENSG00000165629
hsa_circ_0000149	0	0	0	2	0	0	10:79078983..79079330:-	Null
hsa_circ_0000150	0	3	0	0	0	0	10:79354005..79354223:-	Null,ENSG00000108179
hsa_circ_0000151	0	2	0	0	3	0	10:84371014..84373815:+	ENSG00000107771
hsa_circ_0000152	0	0	0	2	4	3	10:84417771..84425893:+	ENSG00000107771
hsa_circ_0000153	0	0	0	0	3	0	10:84417771..84477664:+	ENSG00000107771
hsa_circ_0000154	0	0	0	4	27	4	10:84438512..84477664:+	ENSG00000107771
hsa_circ_0000155	0	0	0	0	6	0	10:84463933..84477664:+	ENSG00000107771
hsa_circ_0000156	0	0	0	2	2	2	10:86716327..86718847:+	ENSG00000122367
hsa_circ_0000157	0	0	0	0	2	0	10:87151350..87152879:+	ENSG00000122376
hsa_circ_0000158	0	0	0	2	0	0	10:88893871..88905660:+	Null,ENSG00000138134
hsa_circ_0000159	0	0	0	0	7	0	10:88901656..88922436:+	ENSG00000138134
hsa_circ_0000160	0	0	0	0	3	0	10:91425281..91462184:+	ENSG00000165338
hsa_circ_0000161	0	2	0	0	0	0	10:91939952..91942568:+	ENSG00000095564
hsa_circ_0000162	0	0	0	0	3	0	10:91994535..92008275:+	ENSG00000095564
hsa_circ_0000163	0	0	0	0	0	2	10:92081320..92091944:-	ENSG00000107864
hsa_circ_0000164	0	0	0	3	0	2	10:92143029..92181019:-	ENSG00000107864
hsa_circ_0000165	0	0	0	0	2	0	10:92474841..92475994:-	ENSG00000119912
hsa_circ_0000166	0	0	0	0	0	2	10:93347617..93349969:-	ENSG00000138119
hsa_circ_0000167	0	0	0	0	2	0	10:93381219..93389154:-	ENSG00000138119
hsa_circ_0000168	0	0	0	0	0	4	10:93676653..93687449:-	ENSG00000148690
hsa_circ_0000169	0	0	0	0	2	0	10:94030683..94032252:+	Null
hsa_circ_0000170	0	0	0	0	0	2	10:94258800..94259150:+	ENSG00000138193
hsa_circ_0000171	0	0	0	0	2	0	10:94510091..94522453:+	ENSG00000108239
hsa_circ_0000172	0	0	0	0	2	0	10:94520459..94520754:+	Null
hsa_circ_0000173	0	0	0	3	0	2	10:94780499..94942341:+	Null
hsa_circ_0000174	0	0	0	0	6	0	10:95339133..95346452:-	ENSG00000095637
hsa_circ_0000175	0	0	0	4	4	2	10:95339133..95367699:-	ENSG00000095637
hsa_circ_0000176	0	0	0	0	2	0	10:95339133..95384285:-	ENSG00000095637
hsa_circ_0000177	0	0	0	0	2	0	10:95339133..95416185:-	Null,ENSG00000095637
hsa_circ_0000178	0	0	0	0	6	16	10:95351209..95384285:-	ENSG00000095637
hsa_circ_0000179	0	0	0	5	6	3	10:95381685..95410777:-	ENSG00000095637
hsa_circ_0000180	0	0	0	0	2	0	10:95421961..95491120:-	ENSG00000095637
hsa_circ_0000181	0	0	0	5	0	0	10:96155924..96160402:+	ENSG00000177853
hsa_circ_0000182	0	0	0	2	0	0	10:96944113..96952196:+	ENSG00000196233
hsa_circ_0000183	3	0	0	8	5	4	10:97436417..97437750:-	ENSG00000171311
hsa_circ_0000184	0	4	0	0	0	0	10:98162883..98209899:+	ENSG00000166024
hsa_circ_0000185	0	0	0	0	2	0	10:98693900..98744056:-	ENSG00000172987
hsa_circ_0000186	0	0	0	0	0	2	11:101504024..101504798:-	ENSG00000137672
hsa_circ_0000187	0	0	0	3	0	2	11:102205893..102209564:+	ENSG00000137693
hsa_circ_0000188	0	0	0	0	3	0	11:103215721..103223086:+	ENSG00000187240
hsa_circ_0000189	0	0	0	0	2	2	11:106978619..106986131:-	ENSG00000152402
hsa_circ_0000190	0	0	0	6	2	0	11:107390074..107392895:-	ENSG00000152404
hsa_circ_0000191	0	0	0	5	5	0	11:108046270..108054955:+	ENSG00000166266
hsa_circ_0000192	0	0	0	2	2	0	11:108176246..108177090:-	ENSG00000149308
hsa_circ_0000193	0	0	0	0	0	2	11:108227595..108235834:+	ENSG00000149311
hsa_circ_0000194	0	0	0	0	2	0	11:108301648..108304852:+	ENSG00000149311
hsa_circ_0000195	0	0	0	2	0	0	11:108767937..108852209:+	ENSG00000178105,Null
hsa_circ_0000196	0	0	0	2	3	0	11:110136663..110137414:+	ENSG00000149289
hsa_circ_0000197	0	0	0	0	3	0	11:110263960..110264874:-	ENSG00000137710
hsa_circ_0000198	0	0	0	0	0	2	11:111752159..111753577:-	ENSG00000137713
hsa_circ_0000199	0	0	0	2	0	0	11:111844601..111865251:-	ENSG00000086848,ENSG00000258529
hsa_circ_0000200	0	0	0	0	3	0	11:112199699..112217889:+	ENSG00000197580
hsa_circ_0000201	0	0	0	0	0	2	11:113833420..113841768:-	ENSG00000048028
hsa_circ_0000202	0	0	0	0	11	0	11:114063211..114064568:+	ENSG00000109906
hsa_circ_0000203	0	0	0	6	0	0	11:115209574..115240420:-	ENSG00000182985
hsa_circ_0000204	0	3	0	0	0	0	11:117152441..117163892:+	ENSG00000168092
hsa_circ_0000205	0	0	0	0	2	0	11:118551786..118559864:-	ENSG00000118096
hsa_circ_0000206	0	0	0	0	2	0	11:118758774..118760044:-	ENSG00000110367
hsa_circ_0000207	0	0	0	0	3	0	11:118779632..118786518:-	ENSG00000110367
hsa_circ_0000208	0	0	0	7	3	0	11:118786052..118786518:-	ENSG00000110367
hsa_circ_0000209	0	0	0	0	3	0	11:119049556..119051601:-	ENSG00000149428
hsa_circ_0000210	0	0	0	0	3	0	11:119273868..119274953:+	ENSG00000110395
hsa_circ_0000211	0	0	0	5	5	2	11:119284969..119285566:+	ENSG00000110395
hsa_circ_0000212	0	2	0	0	0	0	11:120120573..120137281:-	ENSG00000137699
hsa_circ_0000213	0	2	0	5	0	4	11:120406118..120407823:+	ENSG00000196914
hsa_circ_0000214	0	0	0	0	2	0	11:120406118..120409450:+	ENSG00000196914
hsa_circ_0000215	0	2	0	0	0	0	11:120406118..120431911:+	ENSG00000196914
hsa_circ_0000216	0	0	0	2	0	0	11:120469288..120477526:+	ENSG00000196914
hsa_circ_0000217	0	0	0	3	3	0	11:120474560..120477526:+	ENSG00000196914
hsa_circ_0000218	0	0	0	0	2	3	11:120475340..120477526:+	ENSG00000196914
hsa_circ_0000219	0	0	0	0	0	2	11:120653685..120660400:+	ENSG00000149403
hsa_circ_0000220	0	0	0	5	8	4	11:121045674..121060085:+	ENSG00000154114
hsa_circ_0000221	0	0	0	2	0	0	11:1286002..1295794:-	ENSG00000078902
hsa_circ_0000222	0	0	0	0	2	0	11:12879708..12902113:+	ENSG00000187079
hsa_circ_0000223	0	0	0	0	2	0	11:129123446..129127305:-	ENSG00000134909
hsa_circ_0000224	0	15	0	18	12	0	11:130260856..130261929:-	ENSG00000196323
hsa_circ_0000225	0	0	0	0	0	9	11:13413530..13421838:-	ENSG00000148925
hsa_circ_0000226	0	0	0	0	3	3	11:13413530..13445181:-	ENSG00000148925
hsa_circ_0000227	0	0	0	0	2	0	11:14771937..14789242:+	ENSG00000152270
hsa_circ_0000228	0	0	0	0	2	0	11:17131916..17145942:-	ENSG00000011405
hsa_circ_0000229	0	0	0	3	0	2	11:17145668..17145942:-	ENSG00000011405
hsa_circ_0000230	0	0	0	0	0	2	11:17336960..17337534:+	ENSG00000070081
hsa_circ_0000231	0	0	0	0	2	0	11:17878208..18010139:-	ENSG00000129158,Null
hsa_circ_0000232	0	4	0	4	4	0	11:18291442..18292019:-	ENSG00000110756
hsa_circ_0000233	0	0	0	4	10	2	11:18291442..18292976:-	ENSG00000110756
hsa_circ_0000234	0	0	0	2	0	0	11:20402919..20426865:+	ENSG00000185238
hsa_circ_0000235	0	0	0	0	0	3	11:22203804..22227586:+	ENSG00000171714
hsa_circ_0000236	0	0	0	0	0	2	11:22221097..22239684:+	ENSG00000171714
hsa_circ_0000237	0	0	0	0	38	21	11:309013..314356:+	Null
hsa_circ_0000238	0	14	0	7	7	2	11:32927157..32935435:+	ENSG00000060749
hsa_circ_0000239	0	14	4	58	82	62	11:33286413..33287511:+	ENSG00000110422
hsa_circ_0000240	3	0	3	0	0	0	11:3395713..3397406:+	ENSG00000223756
hsa_circ_0000241	0	2	0	0	0	0	11:34071726..34076642:+	ENSG00000135387
hsa_circ_0000242	0	0	0	6	0	0	11:34090179..34092056:+	ENSG00000135387
hsa_circ_0000243	0	2	0	0	5	4	11:34957384..34978182:+	ENSG00000110435
hsa_circ_0000244	0	0	0	4	0	2	11:35201082..35204640:+	ENSG00000026508
hsa_circ_0000245	0	0	0	2	0	0	11:35201082..35208206:+	ENSG00000026508
hsa_circ_0000246	0	0	0	2	0	0	11:35201082..35210054:+	ENSG00000026508
hsa_circ_0000247	0	6	0	5	7	3	11:36227085..36227430:+	ENSG00000179241
hsa_circ_0000248	0	0	0	0	2	0	11:36494976..36497266:-	ENSG00000175104
hsa_circ_0000249	0	0	0	0	3	0	11:3768581..3776021:-	ENSG00000110713
hsa_circ_0000250	0	0	2	0	0	0	11:45862060..45872233:+	ENSG00000121671
hsa_circ_0000251	0	0	0	0	2	0	11:45965315..45979966:-	ENSG00000135365
hsa_circ_0000252	0	0	2	5	6	11	11:46076754..46092223:-	ENSG00000135365
hsa_circ_0000253	0	0	0	0	2	0	11:46493608..46512813:-	ENSG00000110497
hsa_circ_0000254	0	0	0	0	2	0	11:47483453..47484523:-	ENSG00000149187
hsa_circ_0000255	0	3	0	0	0	0	11:47752916..47754664:-	ENSG00000109920
hsa_circ_0000256	0	0	0	4	24	13	11:57491224..57491862:-	ENSG00000149150
hsa_circ_0000257	0	0	0	0	0	2	11:57698559..57700397:+	ENSG00000156599
hsa_circ_0000258	0	0	0	2	0	0	11:59658866..59659469:-	ENSG00000166889
hsa_circ_0000259	3	0	0	0	2	0	11:61132420..61138835:-	ENSG00000167987
hsa_circ_0000260	0	3	0	3	4	0	11:61366045..61367998:+	ENSG00000149483
hsa_circ_0000261	0	0	2	0	3	4	11:61437625..61438113:+	ENSG00000256591,ENSG00000167985
hsa_circ_0000262	0	0	0	0	2	0	11:62520230..62520469:+	ENSG00000124942,Null
hsa_circ_0000263	0	0	0	0	2	0	11:62521607..62522416:-	ENSG00000124942
hsa_circ_0000264	0	0	0	4	0	0	11:62521607..62526682:-	ENSG00000124942
hsa_circ_0000265	0	0	0	3	0	0	11:62529160..62532541:+	Null,ENSG00000124942
hsa_circ_0000266	0	0	0	6	0	0	11:62530132..62530273:-	ENSG00000124942
hsa_circ_0000267	0	0	0	2	0	5	11:62535945..62536567:-	ENSG00000124942
hsa_circ_0000268	2	0	0	0	0	2	11:62638983..62639731:-	ENSG00000089597
hsa_circ_0000269	0	0	0	3	0	0	11:62827155..62827631:-	ENSG00000162236
hsa_circ_0000270	0	3	0	0	0	0	11:642724..642883:+	Null
hsa_circ_0000271	0	0	0	0	0	3	11:64757779..64758704:-	ENSG00000068976
hsa_circ_0000272	0	2	0	0	0	0	11:65426266..65426416:-	ENSG00000245532,Null
hsa_circ_0000273	0	0	0	0	5	0	11:65430769..65437657:+	ENSG00000245532
hsa_circ_0000274	0	0	0	0	0	2	11:65436111..65436317:+	ENSG00000245532
hsa_circ_0000275	0	0	0	3	0	0	11:65499273..65499423:+	ENSG00000251562
hsa_circ_0000276	0	2	0	2	0	0	11:65499273..65499512:+	ENSG00000251562
hsa_circ_0000277	0	0	0	0	7	0	11:65499273..65500063:+	ENSG00000251562
hsa_circ_0000278	0	0	0	0	0	2	11:65500099..65500239:-	Null,ENSG00000251562
hsa_circ_0000279	0	0	0	3	0	0	11:65500399..65500542:+	ENSG00000251562
hsa_circ_0000280	0	0	0	0	3	0	11:65505020..65505186:+	ENSG00000251562
hsa_circ_0000281	0	0	0	9	0	0	11:65505187..65505375:+	ENSG00000251562
hsa_circ_0000282	0	0	0	3	0	0	11:66759043..66762450:+	ENSG00000173715
hsa_circ_0000283	0	0	2	0	0	0	11:67668608..67668787:+	Null
hsa_circ_0000284	0	0	0	2	4	0	11:68438446..68438682:+	ENSG00000162337
hsa_circ_0000285	0	0	0	0	2	0	11:68515028..68519651:+	ENSG00000110075
hsa_circ_0000286	0	0	0	0	3	4	11:68551121..68564432:+	ENSG00000110075
hsa_circ_0000287	0	0	0	0	2	0	11:68567014..68583129:+	ENSG00000110075
hsa_circ_0000288	0	0	0	2	0	0	11:68567014..68603492:+	ENSG00000110075
hsa_circ_0000289	0	0	0	0	0	2	11:68596097..68603492:+	ENSG00000110075
hsa_circ_0000290	0	0	0	0	4	0	11:68596097..68610023:+	ENSG00000110075
hsa_circ_0000291	0	0	0	0	2	3	11:68759569..68761687:-	ENSG00000110090
hsa_circ_0000292	0	0	3	2	3	3	11:70354301..70356254:+	ENSG00000131626
hsa_circ_0000293	0	0	4	0	0	0	11:70659828..70661678:-	ENSG00000162105
hsa_circ_0000294	0	0	0	0	2	0	11:72887470..72889945:-	ENSG00000137478
hsa_circ_0000295	0	0	0	0	4	0	11:72984088..72989097:-	ENSG00000137478
hsa_circ_0000296	0	5	0	0	4	0	11:73707420..73718718:-	ENSG00000175582
hsa_circ_0000297	0	0	0	0	3	0	11:73707420..73718890:-	ENSG00000175582
hsa_circ_0000298	0	0	0	2	0	3	11:73707420..73720899:-	ENSG00000175582
hsa_circ_0000299	0	0	2	0	0	0	11:74789626..74817714:+	ENSG00000166439
hsa_circ_0000300	0	0	0	5	0	0	11:74859158..74863021:-	ENSG00000166435
hsa_circ_0000301	0	0	0	3	4	0	11:76463821..76472840:+	ENSG00000158636
hsa_circ_0000302	0	0	0	0	3	0	11:76513386..76528466:+	ENSG00000158636
hsa_circ_0000303	0	6	0	0	5	2	11:77619606..77625818:-	ENSG00000074201
hsa_circ_0000304	0	3	0	3	0	5	11:77624963..77625818:-	ENSG00000074201
hsa_circ_0000305	0	0	0	2	3	3	11:77683710..77693611:-	ENSG00000048649
hsa_circ_0000306	0	0	0	4	0	0	11:77698487..77702495:-	ENSG00000048649
hsa_circ_0000307	0	0	0	0	0	2	11:8126659..8140193:-	ENSG00000166405
hsa_circ_0000308	0	0	0	2	0	0	11:83161327..83169995:+	ENSG00000165494
hsa_circ_0000309	0	0	0	0	3	3	11:83273647..83278829:-	ENSG00000137500
hsa_circ_0000310	0	0	0	2	0	2	11:8413495..8464822:-	ENSG00000130413
hsa_circ_0000311	0	0	0	0	0	2	11:8435494..8464822:-	ENSG00000130413
hsa_circ_0000312	0	0	0	5	0	0	11:85974708..85983973:-	ENSG00000073921
hsa_circ_0000313	0	0	0	0	0	2	11:85974708..86031611:-	ENSG00000073921
hsa_circ_0000314	0	0	0	0	2	0	11:85981129..85983973:-	ENSG00000073921
hsa_circ_0000315	0	0	0	0	4	0	11:85990250..86031611:-	ENSG00000073921
hsa_circ_0000316	0	0	0	4	26	2	11:85996826..86003451:-	ENSG00000073921
hsa_circ_0000317	0	0	0	3	35	2	11:85996826..86031611:-	ENSG00000073921
hsa_circ_0000318	0	0	0	0	2	0	11:86000643..86031611:-	ENSG00000073921
hsa_circ_0000319	0	0	0	5	2	0	11:86007542..86031611:-	ENSG00000073921
hsa_circ_0000320	0	0	0	0	2	0	11:86012281..86031611:-	ENSG00000073921
hsa_circ_0000321	0	0	0	2	4	0	11:86022367..86031611:-	ENSG00000073921
hsa_circ_0000322	0	0	0	0	3	0	11:86250296..86256512:+	ENSG00000074266
hsa_circ_0000323	0	0	0	0	2	0	11:86306245..86306482:+	ENSG00000149196
hsa_circ_0000324	0	0	0	2	0	0	11:87067694..87071615:+	ENSG00000166575
hsa_circ_0000325	0	0	0	0	5	0	11:8707085..8712735:-	ENSG00000166444
hsa_circ_0000326	0	0	0	9	20	17	11:92352096..92355404:+	ENSG00000165323
hsa_circ_0000327	0	0	0	0	2	0	11:93790574..93794035:+	ENSG00000284057,ENSG00000042429
hsa_circ_0000328	0	5	0	0	0	0	11:9429674..9431003:+	ENSG00000205339
hsa_circ_0000329	0	0	0	5	2	4	11:94795011..94800311:+	ENSG00000166025
hsa_circ_0000330	0	0	0	4	0	2	11:94799390..94800311:+	ENSG00000166025
hsa_circ_0000331	0	0	0	3	0	0	11:94821530..94831541:+	ENSG00000166025
hsa_circ_0000332	0	0	0	2	0	0	11:94850114..94859715:+	ENSG00000166025
hsa_circ_0000333	0	0	0	2	7	2	11:96091892..96093517:-	ENSG00000184384
hsa_circ_0000334	0	0	0	2	0	0	11:9713466..9749183:+	ENSG00000133789
hsa_circ_0000335	0	3	0	0	0	0	11:992503..1000598:+	ENSG00000183020
hsa_circ_0000336	0	0	0	3	0	0	12:100282943..100298175:+	ENSG00000136021
hsa_circ_0000337	0	0	0	0	2	0	12:101714090..101716812:+	ENSG00000111666
hsa_circ_0000338	0	0	0	0	2	0	12:102039868..102046119:-	ENSG00000120860
hsa_circ_0000339	0	0	0	2	3	4	12:1027748..1028572:+	ENSG00000082805
hsa_circ_0000340	0	0	0	0	2	0	12:103263326..103270308:-	ENSG00000179088,Null
hsa_circ_0000341	0	0	0	0	2	0	12:105156726..105162845:+	ENSG00000136051
hsa_circ_0000342	0	8	0	23	26	20	12:108652272..108654410:-	ENSG00000110880
hsa_circ_0000343	0	0	0	0	2	0	12:108658738..108662158:-	ENSG00000110880
hsa_circ_0000344	0	0	0	0	0	2	12:108678272..108701323:-	ENSG00000110880
hsa_circ_0000345	0	0	0	2	3	3	12:109139397..109140058:+	ENSG00000076555
hsa_circ_0000346	0	0	0	0	4	2	12:109222507..109223904:+	ENSG00000076555
hsa_circ_0000347	0	0	0	0	0	3	12:109249984..109259108:+	ENSG00000076555
hsa_circ_0000348	0	0	0	0	0	2	12:109252046..109254334:+	ENSG00000076555
hsa_circ_0000349	0	0	0	0	2	0	12:110128950..110147048:+	ENSG00000122970
hsa_circ_0000350	0	0	0	0	0	2	12:110128950..110163065:+	ENSG00000122970
hsa_circ_0000351	0	0	0	2	0	0	12:110503806..110506693:+	ENSG00000151164
hsa_circ_0000352	0	0	0	2	0	0	12:111482787..111486824:-	ENSG00000204842
hsa_circ_0000353	0	0	0	2	5	0	12:111485265..111486824:-	ENSG00000204842
hsa_circ_0000354	0	0	0	2	0	0	12:111509549..111510582:-	ENSG00000204842
hsa_circ_0000355	0	0	0	0	2	0	12:111509549..111555919:-	ENSG00000204842
hsa_circ_0000356	0	5	0	9	7	3	12:111552280..111555919:-	ENSG00000204842
hsa_circ_0000357	0	0	0	0	3	0	12:111554158..111555919:-	ENSG00000204842
hsa_circ_0000358	0	0	0	0	2	7	12:111753772..111753915:+	ENSG00000111271
hsa_circ_0000359	0	0	0	0	2	0	12:111865250..111871180:+	ENSG00000089022
hsa_circ_0000360	0	0	0	0	0	2	12:111933886..111943369:-	ENSG00000198270
hsa_circ_0000361	0	0	0	0	2	0	12:112075678..112078741:-	ENSG00000111300
hsa_circ_0000362	0	0	0	0	3	2	12:112319225..112319742:-	ENSG00000173064
hsa_circ_0000363	0	0	2	0	2	0	12:113267843..113269845:+	ENSG00000186815
hsa_circ_0000364	0	0	0	0	0	2	12:114385476..114403936:-	ENSG00000089225
hsa_circ_0000365	0	0	2	3	3	0	12:116096669..116111512:-	ENSG00000123066
hsa_circ_0000366	0	0	0	2	0	0	12:116096669..116237705:-	ENSG00000123066
hsa_circ_0000367	0	0	0	3	2	0	12:116230433..116237705:-	ENSG00000123066,Null
hsa_circ_0000368	0	0	0	13	17	5	12:116230533..116237705:-	Null,ENSG00000123066
hsa_circ_0000369	0	0	0	0	2	2	12:118181371..118181607:-	ENSG00000135090
hsa_circ_0000370	0	0	0	0	2	0	12:118243415..118244965:-	ENSG00000135090
hsa_circ_0000371	0	0	0	0	3	0	12:11869424..11869969:+	ENSG00000139083
hsa_circ_0000372	0	0	0	4	0	0	12:119673964..119676670:+	ENSG00000111725
hsa_circ_0000373	2	3	3	4	10	6	12:120154970..120155719:-	ENSG00000089154
hsa_circ_0000374	0	0	0	0	0	2	12:120175162..120176217:-	ENSG00000089154
hsa_circ_0000375	0	0	0	4	0	3	12:120557282..120557682:+	ENSG00000022840
hsa_circ_0000376	0	2	3	6	4	5	12:120782655..120784593:-	ENSG00000157837
hsa_circ_0000377	0	0	0	2	0	0	12:120782655..120791557:-	ENSG00000157837
hsa_circ_0000378	0	0	0	0	4	0	12:122130054..122130916:-	ENSG00000175727,Null
hsa_circ_0000379	0	0	0	0	0	3	12:122288489..122316855:-	ENSG00000130779
hsa_circ_0000380	0	6	0	0	4	0	12:122340753..122341697:-	ENSG00000130779
hsa_circ_0000381	0	3	0	2	0	11	12:12244262..12244655:-	ENSG00000070018
hsa_circ_0000382	0	0	0	0	2	0	12:122477841..122478292:-	ENSG00000033030
hsa_circ_0000383	0	0	0	0	0	2	12:122877802..122879505:-	ENSG00000280138
hsa_circ_0000384	0	0	0	3	0	0	12:123004394..123005548:-	ENSG00000090975
hsa_circ_0000385	0	0	2	2	8	9	12:123498544..123499536:-	ENSG00000188026
hsa_circ_0000386	0	0	0	0	2	0	12:123586747..123590449:+	ENSG00000086598
hsa_circ_0000387	2	0	0	5	0	5	12:124362126..124363799:-	ENSG00000196498
hsa_circ_0000388	0	0	0	2	0	0	12:124372022..124372610:-	ENSG00000196498
hsa_circ_0000389	0	2	2	0	0	3	12:124372022..124378384:-	ENSG00000196498
hsa_circ_0000390	3	0	0	4	7	3	12:124419957..124430787:-	ENSG00000196498
hsa_circ_0000391	0	0	0	2	0	0	12:124419957..124437996:-	ENSG00000196498
hsa_circ_0000392	0	0	0	4	0	0	12:124466173..124495368:-	ENSG00000196498
hsa_circ_0000393	0	0	0	0	3	0	12:12500519..12521463:-	ENSG00000111266
hsa_circ_0000394	0	4	0	0	0	0	12:12519862..12521463:-	ENSG00000111266
hsa_circ_0000395	0	0	0	0	2	0	12:128808788..128815070:-	ENSG00000139370
hsa_circ_0000396	0	0	0	0	3	0	12:128814775..128815070:-	ENSG00000139370
hsa_circ_0000397	0	0	0	5	0	0	12:131000383..131014340:+	ENSG00000111452
hsa_circ_0000398	0	3	0	0	0	0	12:132733996..132734575:-	ENSG00000176915
hsa_circ_0000399	0	0	0	0	0	5	12:133120288..133122024:-	ENSG00000214029
hsa_circ_0000400	0	0	0	0	3	0	12:14423909..14425473:+	ENSG00000171681
hsa_circ_0000401	0	0	0	0	4	0	12:15982308..16032654:+	ENSG00000023697
hsa_circ_0000402	0	0	0	2	0	0	12:1702886..1754514:+	Null,ENSG00000006831
hsa_circ_0000403	0	0	0	2	0	0	12:19253369..19253529:-	Null
hsa_circ_0000404	0	0	0	0	2	0	12:19253940..19322667:+	ENSG00000052126
hsa_circ_0000405	0	0	0	2	0	0	12:19462510..19473355:+	ENSG00000139154
hsa_circ_0000406	0	0	0	2	0	2	12:19462510..19500221:+	ENSG00000139154
hsa_circ_0000407	0	0	0	0	2	0	12:20637100..20654205:+	ENSG00000172572
hsa_circ_0000408	0	0	0	0	0	2	12:2115224..2120430:+	ENSG00000151067
hsa_circ_0000409	0	0	2	0	0	0	12:22643763..22673660:+	ENSG00000139163
hsa_circ_0000410	0	0	0	0	0	2	12:2493190..2512984:+	ENSG00000151067
hsa_circ_0000411	0	0	0	0	0	2	12:2566422..2567794:+	ENSG00000151067
hsa_circ_0000412	0	0	0	3	2	4	12:26996742..26999676:-	ENSG00000064115
hsa_circ_0000413	0	0	0	5	5	3	12:27714780..27724186:+	ENSG00000061794
hsa_circ_0000414	3	0	0	5	6	3	12:2820086..2821792:+	ENSG00000111203
hsa_circ_0000415	0	0	3	0	2	4	12:28225795..28259442:+	ENSG00000123106
hsa_circ_0000416	0	0	0	0	5	0	12:28255581..28307749:+	ENSG00000123106
hsa_circ_0000417	0	0	2	0	0	0	12:28255581..28391411:+	ENSG00000123106
hsa_circ_0000418	0	5	2	8	9	5	12:28305649..28307749:+	ENSG00000123106
hsa_circ_0000419	0	0	3	0	2	0	12:28305649..28391411:+	ENSG00000123106
hsa_circ_0000420	0	0	0	0	0	3	12:29339851..29341218:-	ENSG00000087502
hsa_circ_0000421	0	0	0	3	0	0	12:29339851..29341816:-	ENSG00000087502
hsa_circ_0000422	0	0	0	0	6	0	12:29633147..29660885:-	ENSG00000133687
hsa_circ_0000423	0	0	0	3	7	0	12:29659880..29660885:-	ENSG00000133687
hsa_circ_0000424	0	0	0	0	0	2	12:29751666..29758777:-	ENSG00000133687
hsa_circ_0000425	0	0	0	0	3	0	12:29755709..29758777:-	ENSG00000133687
hsa_circ_0000426	0	0	0	0	3	0	12:31392267..31392696:-	ENSG00000170456
hsa_circ_0000427	0	0	0	0	4	0	12:31442775..31447769:-	ENSG00000170456
hsa_circ_0000428	0	0	0	3	0	0	12:32581960..32611283:+	ENSG00000139132
hsa_circ_0000429	0	0	0	0	2	0	12:32581960..32633689:+	ENSG00000139132
hsa_circ_0000430	0	0	0	6	0	0	12:32598497..32601423:+	ENSG00000139132
hsa_circ_0000431	0	0	0	4	0	4	12:32598497..32611283:+	ENSG00000139132
hsa_circ_0000432	0	0	0	2	0	0	12:32713209..32722633:+	ENSG00000087470
hsa_circ_0000433	0	0	0	2	0	0	12:40028301..40048210:-	ENSG00000151229
hsa_circ_0000434	3	0	0	4	8	6	12:42210355..42210680:-	ENSG00000015153
hsa_circ_0000435	0	0	0	0	3	0	12:42374863..42375074:+	ENSG00000134283
hsa_circ_0000436	0	0	0	0	2	0	12:42374863..42398994:+	ENSG00000134283
hsa_circ_0000437	0	0	0	2	0	2	12:45378053..45390498:+	ENSG00000177119
hsa_circ_0000438	0	0	0	0	0	2	12:45836589..45839496:+	ENSG00000189079
hsa_circ_0000439	0	0	0	4	4	0	12:45836589..45860949:+	ENSG00000189079
hsa_circ_0000440	0	0	0	0	4	10	12:45926142..45928859:-	ENSG00000139218
hsa_circ_0000441	0	4	0	13	12	7	12:46229153..46243314:-	ENSG00000111371
hsa_circ_0000442	0	4	0	0	3	0	12:46229153..46254936:-	ENSG00000111371
hsa_circ_0000443	0	0	0	3	10	4	12:46239679..46243314:-	ENSG00000111371
hsa_circ_0000444	0	0	0	0	2	0	12:46239679..46254936:-	ENSG00000111371
hsa_circ_0000445	0	0	0	0	2	0	12:46444325..46470262:+	Null
hsa_circ_0000446	0	4	0	0	0	0	12:47104113..47108164:+	ENSG00000179715
hsa_circ_0000447	0	0	0	0	4	0	12:48659905..48660619:-	Null
hsa_circ_0000448	0	0	0	0	3	3	12:49097566..49098105:-	ENSG00000139636
hsa_circ_0000449	0	0	0	0	6	0	12:49129500..49186458:-	Null
hsa_circ_0000450	0	0	0	0	0	2	12:50427762..50430570:+	ENSG00000161813
hsa_circ_0000451	0	2	0	3	3	0	12:50427762..50441643:+	ENSG00000161813
hsa_circ_0000452	0	0	0	6	0	0	12:50435488..50441643:+	ENSG00000161813
hsa_circ_0000453	0	0	0	0	2	0	12:50435488..50453672:+	ENSG00000161813
hsa_circ_0000454	0	0	0	2	0	0	12:50814010..50814439:+	ENSG00000123268
hsa_circ_0000455	0	0	0	0	2	0	12:51008476..51010766:-	ENSG00000110911
hsa_circ_0000456	0	0	0	2	2	0	12:51055835..51056502:+	ENSG00000050426
hsa_circ_0000457	0	0	0	3	3	5	12:51073823..51074082:-	ENSG00000110925
hsa_circ_0000458	0	2	0	0	0	0	12:5160307..5171889:+	Null
hsa_circ_0000459	0	0	0	0	8	0	12:52383005..52490953:-	Null
hsa_circ_0000460	0	2	0	0	0	0	12:52446876..52447153:-	ENSG00000185479
hsa_circ_0000461	0	0	0	0	6	0	12:52447539..52515240:-	Null
hsa_circ_0000462	0	0	0	5	0	0	12:52447778..52515832:-	Null
hsa_circ_0000463	4	0	0	0	0	0	12:52449469..52470630:-	Null
hsa_circ_0000464	3	0	11	0	0	0	12:52449469..52490068:-	Null
hsa_circ_0000465	0	0	0	0	0	16	12:52449758..52471296:-	Null
hsa_circ_0000466	0	0	13	0	0	0	12:52451539..52491736:-	Null
hsa_circ_0000467	0	0	0	0	0	2	12:52469411..52487955:-	Null
hsa_circ_0000468	4	36	24	22	0	35	12:52470505..52488548:-	Null
hsa_circ_0000469	13	0	9	0	0	0	12:52471132..52490068:-	Null
hsa_circ_0000470	0	0	0	43	0	0	12:52471132..52517232:-	Null
hsa_circ_0000471	0	0	4	0	2	0	12:52471421..52490733:-	Null
hsa_circ_0000472	4	0	0	3	0	0	12:52473198..52491736:-	Null
hsa_circ_0000473	0	0	0	0	20	0	12:52491522..52518163:-	Null
hsa_circ_0000474	0	10	0	0	0	0	12:52492649..52519160:-	Null
hsa_circ_0000475	0	2	0	0	0	0	12:52517659..52518126:-	ENSG00000186081
hsa_circ_0000476	0	0	0	28	0	0	12:52518946..52678223:-	Null
hsa_circ_0000477	0	3	0	2	3	0	12:52519742..52616380:-	Null
hsa_circ_0000478	0	0	0	0	4	0	12:52678542..52696430:-	Null
hsa_circ_0000479	0	0	0	2	0	0	12:52702892..52811977:-	Null
hsa_circ_0000480	6	0	0	0	0	0	12:52716465..52807864:-	Null
hsa_circ_0000481	0	0	0	2	0	0	12:52806581..52807234:-	ENSG00000170477
hsa_circ_0000482	0	0	0	6	0	8	12:52807644..52807816:-	ENSG00000170477
hsa_circ_0000483	0	0	0	0	0	2	12:52809398..52811797:-	ENSG00000170477
hsa_circ_0000484	0	0	0	0	0	2	12:52811951..52813725:-	ENSG00000170477
hsa_circ_0000485	0	0	0	0	0	2	12:53027782..53028188:+	ENSG00000063046
hsa_circ_0000486	0	0	0	0	2	0	12:54351466..54351668:-	ENSG00000111481
hsa_circ_0000487	4	0	0	75	847	147	12:55700899..55701154:-	ENSG00000135424
hsa_circ_0000488	0	0	0	0	0	2	12:55702872..55703178:-	ENSG00000135424
hsa_circ_0000489	0	0	0	0	2	0	12:56169529..56170208:-	ENSG00000139613
hsa_circ_0000490	0	0	0	2	0	0	12:56670275..56673065:-	ENSG00000110958
hsa_circ_0000491	0	0	0	0	2	0	12:57046552..57048343:-	ENSG00000166866
hsa_circ_0000492	0	0	0	6	0	2	12:57395749..57398198:-	Null
hsa_circ_0000493	0	0	0	0	0	2	12:57395749..57398202:-	Null
hsa_circ_0000494	0	0	0	2	0	0	12:5827769..5922804:-	ENSG00000047617
hsa_circ_0000495	0	0	0	0	0	2	12:5921040..5922804:-	ENSG00000047617
hsa_circ_0000496	0	0	0	0	2	0	12:64648537..64649552:+	Null
hsa_circ_0000497	0	0	4	3	4	2	12:6510279..6510532:-	Null,ENSG00000239002
hsa_circ_0000498	0	0	0	3	0	0	12:65308529..65328603:+	ENSG00000174099
hsa_circ_0000499	0	0	0	0	0	2	12:6548425..6548825:-	ENSG00000010295
hsa_circ_0000500	0	6	0	0	0	0	12:6578846..6581349:-	ENSG00000111642
hsa_circ_0000501	0	3	0	0	0	0	12:66145841..66153448:-	ENSG00000155957,ENSG00000228144
hsa_circ_0000502	0	0	0	0	2	0	12:66203711..66228370:+	ENSG00000090376
hsa_circ_0000503	0	0	0	0	2	0	12:66420720..66455564:-	ENSG00000155974
hsa_circ_0000504	0	0	0	0	2	0	12:66515619..66596927:-	ENSG00000155974
hsa_circ_0000505	2	0	0	0	0	0	12:6769633..6770488:+	ENSG00000159335
hsa_circ_0000506	4	0	0	0	0	0	12:6769639..6769999:+	ENSG00000159335
hsa_circ_0000507	7	0	0	0	0	0	12:6769924..6770218:+	ENSG00000159335
hsa_circ_0000508	2	8	4	0	9	0	12:69251129..69262562:+	ENSG00000111605
hsa_circ_0000509	0	2	0	3	0	0	12:69589485..69592159:+	ENSG00000166226
hsa_circ_0000510	0	0	0	0	2	0	12:69593022..69593586:+	ENSG00000166226
hsa_circ_0000511	0	11	0	6	5	3	12:69800209..69801721:+	ENSG00000127328
hsa_circ_0000512	0	0	0	0	2	0	12:70278132..70311017:+	ENSG00000111596
hsa_circ_0000513	0	0	0	4	4	6	12:79793863..79822190:-	ENSG00000058272
hsa_circ_0000514	0	0	0	0	0	5	12:82369387..82434724:+	ENSG00000127720,Null
hsa_circ_0000515	0	0	0	7	2	0	12:82857010..82857580:+	ENSG00000179104
hsa_circ_0000516	0	0	0	0	0	2	12:88515534..88545865:-	ENSG00000049130
hsa_circ_0000517	4	0	0	0	4	2	12:9074560..9153343:-	Null
hsa_circ_0000518	0	0	0	0	2	0	12:92826166..92853025:-	ENSG00000102189
hsa_circ_0000519	0	0	0	0	2	0	12:94169153..94186473:+	ENSG00000136040
hsa_circ_0000520	0	3	0	0	0	0	12:95057553..95057878:-	ENSG00000120798
hsa_circ_0000521	3	11	3	6	29	6	12:95208843..95211267:-	ENSG00000180263
hsa_circ_0000522	0	0	0	0	4	0	12:9564160..9606456:+	Null
hsa_circ_0000523	0	0	0	0	4	0	12:96323948..96334865:-	ENSG00000059758
hsa_circ_0000524	0	0	0	7	14	9	12:97492461..97561047:+	ENSG00000255794
hsa_circ_0000525	0	0	0	2	0	0	12:99244342..99246864:-	ENSG00000185046
hsa_circ_0000526	0	0	0	0	5	3	12:99772922..99782097:-	ENSG00000185046
hsa_circ_0000527	0	0	0	3	0	0	12:99772922..99806700:-	ENSG00000185046
hsa_circ_0000528	0	0	0	0	2	0	12:99806545..99825389:-	ENSG00000185046
hsa_circ_0000529	0	0	0	9	4	4	13:100257595..100273346:+	ENSG00000175198
hsa_circ_0000530	0	3	0	0	0	0	13:100625535..100670569:-	ENSG00000125247
hsa_circ_0000531	0	0	0	0	2	3	13:102807146..102834552:+	ENSG00000134897,ENSG00000270181
hsa_circ_0000532	0	0	0	0	2	0	13:102852118..102872398:+	ENSG00000134899,ENSG00000270181
hsa_circ_0000533	0	0	0	0	0	3	13:108243532..108251316:+	Null
hsa_circ_0000534	0	0	0	2	0	0	13:110622216..110624279:+	ENSG00000213995
hsa_circ_0000535	0	0	0	5	4	0	13:112516440..112527484:-	ENSG00000126216
hsa_circ_0000536	0	0	0	2	0	0	13:113520616..113539507:+	ENSG00000150403
hsa_circ_0000537	0	0	0	0	0	2	13:113835513..113838191:-	ENSG00000183087
hsa_circ_0000538	0	0	0	0	5	0	13:19475573..19570288:-	Null
hsa_circ_0000539	0	0	0	2	0	0	13:19661698..19670363:+	ENSG00000196199
hsa_circ_0000540	0	3	0	0	2	0	13:19851355..19852190:-	ENSG00000132950
hsa_circ_0000541	0	2	0	0	5	4	13:20731841..20732121:-	ENSG00000150456
hsa_circ_0000542	0	0	0	0	0	3	13:21381434..21391854:-	ENSG00000180776
hsa_circ_0000543	0	0	0	0	7	0	13:23353785..23371165:-	ENSG00000151835
hsa_circ_0000544	2	0	0	0	0	0	13:24222819..24224582:+	ENSG00000182957,ENSG00000273167
hsa_circ_0000545	0	0	0	3	0	0	13:24477701..24478276:-	ENSG00000102699
hsa_circ_0000546	0	0	0	0	2	0	13:26324772..26353880:+	ENSG00000132964
hsa_circ_0000547	0	0	0	0	0	2	13:26337567..26353880:+	ENSG00000132964
hsa_circ_0000548	0	2	0	2	5	0	13:26400453..26401624:+	ENSG00000132964
hsa_circ_0000549	0	3	0	0	0	0	13:28174272..28177935:+	ENSG00000152520
hsa_circ_0000550	0	2	0	0	2	0	13:28256292..28261458:+	ENSG00000152520
hsa_circ_0000551	0	0	0	0	0	2	13:30208577..30283791:-	ENSG00000102781
hsa_circ_0000552	0	0	0	0	2	5	13:30227412..30241086:-	ENSG00000102781
hsa_circ_0000553	0	0	0	0	0	2	13:30227412..30283791:-	ENSG00000102781
hsa_circ_0000554	0	0	0	3	0	0	13:30283616..30283791:-	ENSG00000102781
hsa_circ_0000555	0	0	0	0	0	3	13:31215051..31229294:+	ENSG00000187676
hsa_circ_0000556	0	0	0	0	2	0	13:32078834..32117473:+	ENSG00000073910
hsa_circ_0000557	0	0	0	0	2	0	13:32438652..32444126:-	ENSG00000244754
hsa_circ_0000558	0	0	0	0	2	0	13:32480590..32527532:-	Null,ENSG00000244754
hsa_circ_0000559	0	6	0	24	16	17	13:32517857..32527532:-	ENSG00000244754
hsa_circ_0000560	0	0	0	0	3	2	13:32535769..32537027:-	ENSG00000244754
hsa_circ_0000561	0	2	0	0	0	0	13:32648754..32678929:+	ENSG00000083642
hsa_circ_0000562	0	0	0	3	4	0	13:32732101..32735330:+	ENSG00000083642
hsa_circ_0000563	0	2	0	0	0	0	13:37040405..37051583:-	ENSG00000102710
hsa_circ_0000564	0	4	0	0	2	0	13:40559509..40560860:-	ENSG00000150907
hsa_circ_0000565	0	0	0	0	3	0	13:40826506..40836885:-	ENSG00000168852
hsa_circ_0000566	0	0	0	0	0	4	13:40908159..40912723:-	Null
hsa_circ_0000567	0	0	0	0	2	0	13:40940921..40943925:-	ENSG00000120690
hsa_circ_0000568	0	0	0	0	3	0	13:40942952..40943925:-	ENSG00000120690
hsa_circ_0000569	0	0	0	0	0	3	13:41252645..41260915:-	ENSG00000120662
hsa_circ_0000570	0	0	0	0	0	2	13:41761128..41833531:-	ENSG00000102763
hsa_circ_0000571	0	0	0	0	2	0	13:41811225..41819386:-	ENSG00000102763
hsa_circ_0000572	0	0	0	6	3	2	13:41865736..41868477:-	ENSG00000102763
hsa_circ_0000573	0	0	0	2	0	0	13:41865736..41887361:-	ENSG00000102763
hsa_circ_0000574	0	5	0	0	0	0	13:42285986..42308609:+	ENSG00000023516
hsa_circ_0000575	0	2	0	0	0	0	13:42917541..42970670:-	ENSG00000133106
hsa_circ_0000576	0	4	0	0	0	0	13:42953948..42970670:-	ENSG00000133106
hsa_circ_0000577	0	3	0	0	0	0	13:45151687..45207505:+	ENSG00000188342
hsa_circ_0000578	0	0	0	0	2	0	13:45362461..45362654:-	Null
hsa_circ_0000579	0	0	0	0	2	2	13:45516143..45519094:+	ENSG00000136152
hsa_circ_0000580	0	0	0	3	2	0	13:45516143..45525051:+	ENSG00000136152
hsa_circ_0000581	0	0	0	4	3	0	13:46723221..46728984:+	ENSG00000136141
hsa_circ_0000582	0	4	0	5	0	0	13:46723221..46733998:+	ENSG00000136141
hsa_circ_0000583	0	0	0	3	2	2	13:48077153..48090418:-	ENSG00000136146
hsa_circ_0000584	0	0	0	2	0	0	13:49196877..49198574:+	ENSG00000102531
hsa_circ_0000585	0	0	0	0	4	0	13:49451553..49451909:+	ENSG00000136169
hsa_circ_0000586	0	0	0	0	2	0	13:49451553..49467960:+	ENSG00000136169
hsa_circ_0000587	0	0	0	0	2	0	13:49480219..49483563:+	ENSG00000136169
hsa_circ_0000588	0	0	0	0	3	0	13:49706098..49706372:-	ENSG00000102753
hsa_circ_0000589	0	2	2	7	5	6	13:50927407..50949505:+	ENSG00000136104
hsa_circ_0000590	0	0	0	0	0	4	13:52657532..52659249:+	ENSG00000165416
hsa_circ_0000591	0	0	0	6	10	9	13:60439688..60467379:+	ENSG00000083544
hsa_circ_0000592	0	0	0	0	0	2	13:60439688..60535233:+	ENSG00000083544
hsa_circ_0000593	0	0	0	0	2	0	13:75326197..75349302:-	ENSG00000136111
hsa_circ_0000594	0	2	0	3	5	0	13:75560753..75569507:+	ENSG00000118939,ENSG00000261553
hsa_circ_0000595	0	0	0	2	0	0	13:75621763..75727098:+	ENSG00000261553
hsa_circ_0000596	0	0	0	3	0	0	13:77205256..77243951:-	ENSG00000005810
hsa_circ_0000597	0	0	0	0	2	0	13:77211167..77243951:-	ENSG00000005810
hsa_circ_0000598	0	0	0	2	0	0	13:77217840..77243951:-	ENSG00000005810
hsa_circ_0000599	0	0	0	4	0	0	13:77559804..77597589:+	ENSG00000136155
hsa_circ_0000600	0	2	0	0	0	0	13:83802377..83827510:-	Null
hsa_circ_0000601	0	4	0	3	7	7	13:95757644..95763953:+	ENSG00000102580
hsa_circ_0000602	0	0	0	0	2	0	13:95832927..95837202:-	ENSG00000102595
hsa_circ_0000603	0	0	0	0	3	0	13:95983804..95999307:-	ENSG00000102595
hsa_circ_0000604	0	0	0	2	2	3	13:99238427..99244624:+	ENSG00000134882
hsa_circ_0000605	0	0	0	0	2	0	14:101901719..101906529:+	ENSG00000078304
hsa_circ_0000606	5	0	5	10	11	13	14:102040236..102040673:+	ENSG00000197102
hsa_circ_0000607	0	0	0	0	5	0	14:102194938..102209862:+	ENSG00000140153
hsa_circ_0000608	0	0	0	0	3	0	14:102325985..102326887:+	ENSG00000022976
hsa_circ_0000609	0	0	0	0	2	0	14:102788133..102788523:+	Null
hsa_circ_0000610	0	0	0	0	0	6	14:102968253..102970261:-	ENSG00000198752
hsa_circ_0000611	0	0	0	3	0	2	14:103662116..103662927:+	ENSG00000256500,ENSG00000126214
hsa_circ_0000612	0	0	0	0	2	0	14:105226069..105226760:-	ENSG00000185024
hsa_circ_0000613	7	2	0	59	72	71	14:105587554..105707562:-	Null
hsa_circ_0000614	0	0	0	0	7	0	14:105624896..105643525:-	Null
hsa_circ_0000615	0	0	0	0	3	0	14:105624896..105668565:-	Null
hsa_circ_0000616	0	0	5	0	0	0	14:105625772..105644103:-	Null
hsa_circ_0000617	89	0	0	0	0	0	14:105625772..105742385:-	Null
hsa_circ_0000618	0	0	0	0	4	0	14:105625772..105770719:-	Null
hsa_circ_0000619	0	0	0	0	2	0	14:105644068..105669576:-	Null
hsa_circ_0000620	0	0	0	0	2	0	14:105644496..105770719:-	Null
hsa_circ_0000621	0	0	0	0	2	0	14:105707970..105708129:+	ENSG00000211895
hsa_circ_0000622	0	0	4	0	0	0	14:105741893..105769559:-	Null
hsa_circ_0000623	0	0	0	0	2	0	14:105741893..105769698:-	Null
hsa_circ_0000624	0	0	4	0	0	0	14:105742341..105769986:-	Null
hsa_circ_0000625	0	0	0	0	4	0	14:105742341..105771137:-	Null
hsa_circ_0000626	0	0	0	0	5	0	14:105742793..105863221:-	Null
hsa_circ_0000627	0	4	0	0	0	0	14:105770293..105770525:-	ENSG00000211897
hsa_circ_0000628	0	0	0	0	6	0	14:106062559..106116941:-	Null
hsa_circ_0000629	0	0	0	0	3	0	14:106117039..106235368:-	Null
hsa_circ_0000630	0	0	0	2	0	0	14:106129947..106235368:-	Null
hsa_circ_0000631	0	0	0	0	2	0	14:106235470..106258074:-	Null
hsa_circ_0000632	0	0	0	0	2	0	14:106235470..106356453:-	Null
hsa_circ_0000633	2	0	0	0	0	0	14:106235470..106389696:-	Null
hsa_circ_0000634	0	0	0	0	2	0	14:106235470..106393080:-	Null
hsa_circ_0000635	2	0	0	0	3	0	14:106422102..106606422:-	Null
hsa_circ_0000636	0	0	0	0	15	0	14:106557352..106675318:-	Null
hsa_circ_0000637	4	6	0	2	0	0	14:106593081..106675318:-	Null
hsa_circ_0000638	4	0	0	0	0	0	14:106675420..106791004:-	Null
hsa_circ_0000639	0	5	0	3	0	2	14:21230319..21234229:-	ENSG00000092199
hsa_circ_0000640	0	0	0	0	2	0	14:21357197..21361213:-	ENSG00000092201
hsa_circ_0000641	0	0	0	5	9	5	14:21503173..21503881:-	ENSG00000165819
hsa_circ_0000642	0	2	0	2	7	3	14:22906195..22911403:-	ENSG00000100461
hsa_circ_0000643	0	2	0	12	11	4	14:22909483..22911403:-	ENSG00000100461
hsa_circ_0000644	0	0	0	2	0	0	14:22926133..22927660:-	ENSG00000100462
hsa_circ_0000645	0	0	0	0	0	2	14:23033368..23033674:-	ENSG00000100804
hsa_circ_0000646	0	0	0	18	0	0	14:23400256..23427894:-	Null
hsa_circ_0000647	0	0	0	4	0	0	14:23405223..23432506:-	Null
hsa_circ_0000648	0	0	0	3	0	0	14:23415629..23416036:-	ENSG00000092054
hsa_circ_0000649	0	0	0	0	7	0	14:30633947..30643405:+	ENSG00000092108
hsa_circ_0000650	0	0	0	2	0	0	14:30715924..30734858:+	ENSG00000092108
hsa_circ_0000651	0	0	0	2	0	0	14:30902536..30911162:-	ENSG00000196792
hsa_circ_0000652	0	2	0	5	3	4	14:30935163..30956242:-	ENSG00000196792
hsa_circ_0000653	0	0	0	5	3	0	14:31127785..31133675:-	ENSG00000092148
hsa_circ_0000654	0	0	0	0	2	0	14:31127785..31144941:-	ENSG00000092148
hsa_circ_0000655	0	0	0	3	2	3	14:31127785..31172122:-	ENSG00000092148
hsa_circ_0000656	0	0	0	2	0	3	14:31133238..31133675:-	ENSG00000092148
hsa_circ_0000657	0	10	6	0	27	29	14:32090502..32094386:+	ENSG00000100852
hsa_circ_0000658	0	5	11	12	8	11	14:32090502..32117287:+	ENSG00000100852
hsa_circ_0000659	0	0	0	2	0	0	14:32090502..32146340:+	ENSG00000100852
hsa_circ_0000660	0	0	0	0	2	0	14:32821402..32824815:+	ENSG00000151320
hsa_circ_0000661	0	0	0	0	2	6	14:33215182..33215587:+	ENSG00000151322
hsa_circ_0000662	0	0	0	0	2	0	14:33215182..33367268:+	ENSG00000151322
hsa_circ_0000663	0	0	0	2	0	2	14:33925618..33931215:-	ENSG00000129521
hsa_circ_0000664	0	0	0	2	14	2	14:34551714..34554912:-	Null
hsa_circ_0000665	0	0	0	0	2	0	14:34862044..34862322:-	ENSG00000198604
hsa_circ_0000666	0	0	0	0	4	0	14:37285318..37308519:+	ENSG00000151338
hsa_circ_0000667	0	0	0	0	4	0	14:39158285..39159550:-	ENSG00000182400
hsa_circ_0000668	0	4	0	0	4	0	14:39179091..39179462:+	ENSG00000100941
hsa_circ_0000669	2	0	0	3	0	4	14:39276934..39279537:+	ENSG00000150527,ENSG00000258941
hsa_circ_0000670	0	2	3	3	11	4	14:45118028..45130790:-	ENSG00000100442
hsa_circ_0000671	0	0	0	0	3	0	14:49602370..49608121:+	ENSG00000165501
hsa_circ_0000672	0	0	0	0	2	0	14:49802453..49806133:-	ENSG00000165525
hsa_circ_0000673	0	0	0	2	0	0	14:49825867..49831361:-	ENSG00000165525
hsa_circ_0000674	0	0	0	0	0	4	14:49832051..49834449:-	ENSG00000165525
hsa_circ_0000675	0	3	0	4	4	2	14:50150008..50150230:-	ENSG00000100485
hsa_circ_0000676	0	2	0	0	0	0	14:50150008..50153173:-	ENSG00000100485
hsa_circ_0000677	0	0	0	2	0	0	14:50180572..50204409:-	ENSG00000100485
hsa_circ_0000678	0	0	0	0	3	0	14:50640750..50645014:-	ENSG00000151748
hsa_circ_0000679	0	0	0	0	0	2	14:50915336..50917105:-	ENSG00000100504
hsa_circ_0000680	0	0	0	8	4	6	14:54702062..54702580:+	ENSG00000020577
hsa_circ_0000681	0	0	0	0	0	4	14:54702062..54737287:+	ENSG00000020577
hsa_circ_0000682	0	0	2	0	2	0	14:55612019..55619312:+	ENSG00000126777
hsa_circ_0000683	0	0	0	0	2	0	14:55612390..55618134:+	ENSG00000126777
hsa_circ_0000684	0	0	0	0	0	3	14:55648025..55648870:+	ENSG00000126777
hsa_circ_0000685	0	0	0	5	0	0	14:57229734..57234032:-	ENSG00000070367
hsa_circ_0000686	0	0	0	0	0	2	14:60796217..60818847:+	ENSG00000020426
hsa_circ_0000687	0	0	0	0	0	3	14:61720382..61721823:+	ENSG00000100644
hsa_circ_0000688	0	0	0	2	0	0	14:61721509..61721823:+	ENSG00000100644
hsa_circ_0000689	0	0	0	2	0	9	14:63998914..64022863:+	ENSG00000054654
hsa_circ_0000690	0	0	2	0	0	0	14:64009966..64017756:+	ENSG00000054654
hsa_circ_0000691	0	0	0	2	0	0	14:65430216..65455718:+	ENSG00000033170
hsa_circ_0000692	0	0	0	2	2	0	14:65432037..65455718:+	Null
hsa_circ_0000693	2	0	0	7	7	3	14:65561337..65561766:+	ENSG00000033170
hsa_circ_0000694	0	0	0	0	3	0	14:67269701..67303599:+	ENSG00000072415
hsa_circ_0000695	0	0	0	0	2	0	14:67301389..67303599:+	ENSG00000072415
hsa_circ_0000696	0	0	0	0	4	0	14:67761366..67762819:-	ENSG00000072121
hsa_circ_0000697	0	0	0	0	0	3	14:69703395..69704742:+	ENSG00000100647
hsa_circ_0000698	0	0	0	0	2	0	14:71073545..71076419:+	ENSG00000100731
hsa_circ_0000699	0	2	2	0	0	0	14:71400794..71418196:+	ENSG00000197555
hsa_circ_0000700	0	0	0	0	2	0	14:71413948..71414680:+	Null
hsa_circ_0000701	0	0	0	0	0	3	14:71413948..71529370:+	ENSG00000197555
hsa_circ_0000702	0	0	0	0	2	0	14:72714423..72731934:-	ENSG00000205683
hsa_circ_0000703	0	0	0	0	4	4	14:73147795..73148094:+	ENSG00000080815
hsa_circ_0000704	0	0	0	0	2	2	14:73147795..73148106:+	ENSG00000080815
hsa_circ_0000705	0	0	0	0	0	3	14:73147795..73173707:+	ENSG00000080815
hsa_circ_0000706	0	0	0	0	2	0	14:73282359..73297285:-	ENSG00000133961
hsa_circ_0000707	0	0	0	3	10	3	14:75046376..75049718:-	ENSG00000119684
hsa_circ_0000708	0	0	0	0	6	0	14:75109685..75110371:-	ENSG00000119638
hsa_circ_0000709	0	0	0	0	0	2	14:76031955..76059373:+	ENSG00000119650
hsa_circ_0000710	0	0	0	0	8	0	14:76166663..76180849:+	ENSG00000089916
hsa_circ_0000711	0	0	0	3	8	4	14:79697630..79805190:+	ENSG00000021645
hsa_circ_0000712	0	0	0	0	0	5	14:79805112..79862318:+	ENSG00000021645
hsa_circ_0000713	0	0	0	0	3	0	14:80743075..80778046:-	ENSG00000100629
hsa_circ_0000714	0	0	0	0	0	2	14:80836205..80840768:-	ENSG00000100629
hsa_circ_0000715	0	0	0	4	0	0	14:80895718..80906081:-	ENSG00000100629
hsa_circ_0000716	0	0	0	0	2	0	14:80939385..80942380:-	ENSG00000100629
hsa_circ_0000717	0	0	0	0	3	0	14:86028369..86041833:+	Null
hsa_circ_0000718	0	0	0	0	3	0	14:88416711..88437903:+	ENSG00000042317
hsa_circ_0000719	0	0	0	0	3	0	14:88416711..88438146:+	ENSG00000042317
hsa_circ_0000720	0	0	0	0	2	0	14:88607243..88610940:+	ENSG00000100722
hsa_circ_0000721	0	0	0	0	2	0	14:88726541..88754671:-	ENSG00000165521
hsa_circ_0000722	0	0	0	3	0	0	14:89161701..89162969:-	ENSG00000053254
hsa_circ_0000723	0	0	0	0	3	0	14:89161701..89180806:-	ENSG00000053254
hsa_circ_0000724	0	2	0	0	0	0	14:89280950..89350808:-	ENSG00000053254
hsa_circ_0000725	0	0	0	0	5	0	14:90890487..90906299:-	ENSG00000100784
hsa_circ_0000726	0	2	0	0	0	0	14:90943078..90978524:-	ENSG00000100784
hsa_circ_0000727	0	0	0	2	6	0	14:90943078..91001159:-	ENSG00000100784
hsa_circ_0000728	0	0	0	2	0	0	14:91481576..91485730:-	ENSG00000100796
hsa_circ_0000729	0	2	0	0	0	0	14:91719418..91729479:-	ENSG00000133962
hsa_circ_0000730	0	0	0	5	0	0	14:92003419..92007852:-	ENSG00000100815
hsa_circ_0000731	0	0	0	3	0	0	14:92088730..92093831:-	ENSG00000066427
hsa_circ_0000732	0	2	0	0	0	0	14:92126122..92143294:+	ENSG00000165934
hsa_circ_0000733	0	0	0	0	3	0	14:93293858..93294937:-	ENSG00000011114
hsa_circ_0000734	0	0	0	0	4	7	14:93293858..93296157:-	ENSG00000011114
hsa_circ_0000735	0	0	0	2	0	0	14:96520055..96521072:+	ENSG00000090060
hsa_circ_0000736	0	0	0	0	3	0	14:96555847..96556413:+	ENSG00000090060
hsa_circ_0000737	0	9	0	2	0	6	14:96833467..96860735:+	ENSG00000100749
hsa_circ_0000738	0	0	0	3	2	0	14:96846095..96860735:+	ENSG00000100749
hsa_circ_0000739	0	0	0	2	0	0	14:99257471..99257836:-	ENSG00000127152
hsa_circ_0000740	2	0	0	7	0	3	14:99257471..99257839:-	ENSG00000127152
hsa_circ_0000741	0	5	0	14	26	14	14:99458279..99465813:-	ENSG00000183576
hsa_circ_0000742	0	0	0	4	4	0	14:99914179..99914697:+	ENSG00000066629
hsa_circ_0000743	0	0	0	0	3	0	15:100152612..100199423:-	ENSG00000140470
hsa_circ_0000744	0	0	0	4	13	7	15:100330889..100334180:-	ENSG00000140470,Null
hsa_circ_0000745	0	0	0	0	3	0	15:100564692..100565265:-	ENSG00000140471
hsa_circ_0000746	0	2	0	0	11	0	15:101235082..101235577:-	ENSG00000131873
hsa_circ_0000747	0	0	0	6	5	7	15:25405461..25411971:-	ENSG00000114062
hsa_circ_0000748	0	0	0	0	0	2	15:25707976..25726082:-	ENSG00000206190
hsa_circ_0000749	0	0	0	0	0	2	15:28143873..28146344:-	ENSG00000128731
hsa_circ_0000750	0	0	2	0	3	4	15:29761139..29773357:-	ENSG00000104067
hsa_circ_0000751	0	0	0	0	2	0	15:29761139..29800702:-	ENSG00000104067
hsa_circ_0000752	0	0	0	3	0	0	15:36644278..36657905:+	ENSG00000186073
hsa_circ_0000753	0	2	0	0	0	0	15:40628070..40650819:+	Null,ENSG00000137812
hsa_circ_0000754	0	0	0	4	3	0	15:40744047..40745259:-	ENSG00000137824
hsa_circ_0000755	0	12	2	9	9	5	15:41668828..41669958:+	ENSG00000174197
hsa_circ_0000756	0	0	0	2	0	0	15:41668828..41713496:+	ENSG00000174197
hsa_circ_0000757	0	0	0	4	2	3	15:41696075..41699159:+	ENSG00000174197
hsa_circ_0000758	0	3	0	0	0	0	15:41696075..41713496:+	ENSG00000174197
hsa_circ_0000759	0	0	0	0	2	0	15:42810614..42840433:-	ENSG00000128881
hsa_circ_0000760	0	0	0	0	4	3	15:42827928..42840433:-	ENSG00000128881
hsa_circ_0000761	0	0	0	2	0	0	15:43021275..43025429:-	ENSG00000159459
hsa_circ_0000762	0	0	0	2	0	0	15:43455892..43457218:-	ENSG00000067369
hsa_circ_0000763	0	0	0	7	0	0	15:44328685..44338317:+	ENSG00000166734
hsa_circ_0000764	0	0	0	3	0	0	15:44331988..44338317:+	ENSG00000166734
hsa_circ_0000765	0	0	0	0	0	2	15:44569398..44570658:-	ENSG00000104133
hsa_circ_0000766	0	0	0	0	3	0	15:48596283..48613092:-	ENSG00000166147
hsa_circ_0000767	0	0	0	0	2	0	15:49225205..49292537:+	Null,ENSG00000156958
hsa_circ_0000768	0	3	0	0	0	0	15:49235851..49239367:+	ENSG00000156958
hsa_circ_0000769	0	2	0	2	0	3	15:49235851..49292537:+	ENSG00000156958
hsa_circ_0000770	0	0	0	0	5	0	15:50300789..50301368:-	ENSG00000104064
hsa_circ_0000771	0	0	0	0	2	0	15:50300789..50304133:-	ENSG00000104064
hsa_circ_0000772	0	0	0	2	0	0	15:50465047..50471795:+	ENSG00000138592
hsa_circ_0000773	0	0	0	0	2	0	15:50586392..50592626:-	ENSG00000092439
hsa_circ_0000774	0	0	0	0	5	0	15:51869217..51902036:+	ENSG00000138594
hsa_circ_0000775	0	0	0	0	2	0	15:51900155..51902036:+	ENSG00000138594
hsa_circ_0000776	0	0	0	0	2	0	15:52045830..52050137:+	ENSG00000069956
hsa_circ_0000777	0	0	0	0	2	0	15:56391243..56394834:+	ENSG00000151575
hsa_circ_0000778	0	0	0	0	0	2	15:57461680..57461892:+	ENSG00000128849
hsa_circ_0000779	0	0	0	0	0	2	15:58897115..58901287:-	ENSG00000137776
hsa_circ_0000780	0	0	0	0	4	0	15:58912563..58913696:-	ENSG00000137776
hsa_circ_0000781	0	7	4	14	13	8	15:58912563..58916999:-	ENSG00000137776
hsa_circ_0000782	0	0	0	2	0	0	15:60442416..60445791:-	ENSG00000128915
hsa_circ_0000783	0	0	0	4	11	0	15:62007308..62013992:-	ENSG00000129003
hsa_circ_0000784	0	0	0	0	6	0	15:62033441..62044255:-	ENSG00000129003
hsa_circ_0000785	0	0	0	0	3	0	15:63056985..63062645:+	ENSG00000140416
hsa_circ_0000786	0	0	0	0	2	0	15:63057039..63059680:+	ENSG00000140416
hsa_circ_0000787	0	0	0	3	0	0	15:63529014..63574403:+	ENSG00000140455
hsa_circ_0000788	0	3	0	0	0	0	15:63532647..63537156:+	ENSG00000140455
hsa_circ_0000789	0	2	0	0	0	0	15:63532647..63563008:+	ENSG00000140455
hsa_circ_0000790	0	0	0	2	0	2	15:63696124..63716473:-	ENSG00000103657
hsa_circ_0000791	0	0	0	0	2	3	15:63706780..63716473:-	ENSG00000103657
hsa_circ_0000792	0	0	0	0	3	0	15:63774694..63775649:-	ENSG00000103657
hsa_circ_0000793	3	10	0	23	41	30	15:64499293..64500166:+	ENSG00000180357
hsa_circ_0000794	0	0	0	2	0	0	15:64859894..64865228:+	ENSG00000241839
hsa_circ_0000795	0	0	0	0	2	0	15:64974602..64981025:-	ENSG00000090487
hsa_circ_0000796	0	0	0	3	3	0	15:64974602..64983593:-	ENSG00000090487
hsa_circ_0000797	0	0	0	0	2	0	15:65463761..65480399:-	ENSG00000074603
hsa_circ_0000798	0	0	0	0	3	0	15:65466678..65480399:-	ENSG00000074603
hsa_circ_0000799	0	0	0	0	2	0	15:65507243..65512564:-	ENSG00000074603
hsa_circ_0000800	0	0	0	3	6	4	15:67231814..67236820:-	ENSG00000103591
hsa_circ_0000801	0	0	0	2	0	0	15:68145816..68173892:+	ENSG00000033800
hsa_circ_0000802	0	0	0	0	0	2	15:68176613..68181292:-	Null,ENSG00000033800
hsa_circ_0000803	0	2	0	0	0	0	15:69436138..69436722:+	ENSG00000137807
hsa_circ_0000804	0	0	0	2	0	0	15:71916370..71938927:-	ENSG00000066933
hsa_circ_0000805	0	0	0	0	0	4	15:72045724..72046634:-	ENSG00000066933
hsa_circ_0000806	0	0	0	3	0	0	15:72760407..72775097:-	ENSG00000159322
hsa_circ_0000807	0	0	0	0	0	2	15:72771783..72775097:-	ENSG00000159322
hsa_circ_0000808	0	0	0	0	2	0	15:75400730..75413045:-	ENSG00000169375
hsa_circ_0000809	0	0	0	0	4	0	15:75409836..75413045:-	ENSG00000169375
hsa_circ_0000810	0	0	0	3	0	0	15:75411492..75413045:-	ENSG00000169375
hsa_circ_0000811	0	3	0	3	3	4	15:75859878..75873568:+	ENSG00000140367
hsa_circ_0000812	0	0	0	0	3	0	15:75868951..75883424:+	ENSG00000140367
hsa_circ_0000813	0	0	0	3	0	0	15:76274412..76286481:-	ENSG00000140374
hsa_circ_0000814	0	0	0	0	2	0	15:76274412..76292700:-	ENSG00000140374
hsa_circ_0000815	0	4	0	0	6	2	15:76274412..76295737:-	ENSG00000140374
hsa_circ_0000816	0	2	0	0	0	0	15:76287846..76292700:-	ENSG00000140374
hsa_circ_0000817	0	0	0	0	0	4	15:76292431..76295737:-	ENSG00000140374
hsa_circ_0000818	0	0	0	3	0	0	15:77178790..77182040:-	ENSG00000173517
hsa_circ_0000819	0	2	0	3	0	0	15:77252367..77284030:-	Null
hsa_circ_0000820	0	2	0	0	0	0	15:78264757..78280506:+	ENSG00000140403
hsa_circ_0000821	0	0	0	2	0	0	15:80098416..80122800:+	ENSG00000086666
hsa_circ_0000822	0	5	0	4	5	0	15:80120328..80122800:+	ENSG00000086666
hsa_circ_0000823	0	0	0	2	0	3	15:80970462..80982182:-	Null
hsa_circ_0000824	0	2	0	0	0	0	15:82382208..82382879:+	Null
hsa_circ_0000825	0	0	0	0	0	3	15:82382208..82382883:+	Null
hsa_circ_0000826	0	0	0	0	2	0	15:84680713..84687774:-	ENSG00000140612
hsa_circ_0000827	0	0	0	0	0	3	15:84687625..84691644:-	ENSG00000140612
hsa_circ_0000828	0	3	0	0	2	2	15:85113377..85126374:+	ENSG00000073417
hsa_circ_0000829	0	0	0	6	6	5	15:85113873..85121014:+	ENSG00000073417
hsa_circ_0000830	0	0	0	0	2	0	15:85664563..85684873:+	ENSG00000170776
hsa_circ_0000831	0	0	5	4	8	9	15:89113725..89116521:+	ENSG00000140526
hsa_circ_0000832	0	0	0	0	0	2	15:89113725..89155534:+	ENSG00000140526
hsa_circ_0000833	0	0	0	0	2	0	15:89495789..89495931:-	Null
hsa_circ_0000834	0	0	0	0	0	2	15:89871475..89889140:-	ENSG00000250021,ENSG00000157823
hsa_circ_0000835	0	0	0	0	0	5	15:89888521..89889140:-	ENSG00000157823,ENSG00000250021
hsa_circ_0000836	0	0	0	0	2	2	15:90217439..90221765:+	ENSG00000185033
hsa_circ_0000837	0	3	0	0	6	0	15:90439332..90443478:+	ENSG00000140575
hsa_circ_0000838	0	2	0	0	0	0	15:92833205..92900824:+	Null
hsa_circ_0000839	0	3	0	0	0	0	15:92848337..92901299:+	Null
hsa_circ_0000840	0	2	0	0	0	0	15:92885515..92901299:+	ENSG00000279765
hsa_circ_0000841	0	3	0	3	0	0	15:92924321..92929091:+	ENSG00000279765,ENSG00000173575
hsa_circ_0000842	0	0	0	0	2	0	15:92953357..92956649:+	ENSG00000173575
hsa_circ_0000843	0	0	0	0	4	4	15:92996957..92998621:+	ENSG00000173575
hsa_circ_0000844	0	0	2	0	2	0	15:92996957..93002317:+	ENSG00000173575
hsa_circ_0000845	0	0	0	0	3	0	15:93000512..93014909:+	ENSG00000173575
hsa_circ_0000846	0	3	0	0	0	0	15:94298201..94298730:+	ENSG00000140563
hsa_circ_0000847	0	3	0	0	0	0	15:94298201..94315637:+	ENSG00000140563
hsa_circ_0000848	0	2	0	0	0	0	15:94356137..94370180:+	ENSG00000140563
hsa_circ_0000849	0	2	0	0	0	0	15:94356137..94385525:+	ENSG00000140563
hsa_circ_0000850	0	4	0	0	0	0	15:94356137..94402019:+	ENSG00000140563
hsa_circ_0000851	0	0	0	0	0	2	15:96282832..96290783:-	ENSG00000247809
hsa_circ_0000852	0	0	0	4	11	3	15:96334076..96337535:+	ENSG00000185551
hsa_circ_0000853	0	0	0	0	2	0	15:97652052..97670337:-	Null,ENSG00000251209
hsa_circ_0000854	0	0	0	0	0	3	15:97652052..97673257:-	Null,ENSG00000251209
hsa_circ_0000855	0	0	2	0	0	4	15:98707562..98708107:+	ENSG00000140443
hsa_circ_0000856	0	0	0	0	2	0	15:99113591..99131813:+	ENSG00000182253
hsa_circ_0000857	0	2	0	0	0	0	16:10515063..10528274:-	Null
hsa_circ_0000858	0	0	0	0	0	2	16:10969161..10982991:+	ENSG00000038532
hsa_circ_0000859	0	0	0	0	0	3	16:11020193..11051641:+	ENSG00000038532
hsa_circ_0000860	0	0	0	4	4	4	16:11020193..11061022:+	ENSG00000038532
hsa_circ_0000861	0	0	0	2	0	2	16:11020193..11126146:+	ENSG00000038532
hsa_circ_0000862	0	0	0	0	2	0	16:11698125..11721670:-	ENSG00000153066
hsa_circ_0000863	0	0	0	2	0	0	16:11779166..11782388:-	ENSG00000122299
hsa_circ_0000864	0	0	0	0	0	3	16:11846501..11847806:-	ENSG00000171490
hsa_circ_0000865	0	0	0	0	2	0	16:14552021..14584791:-	ENSG00000140694
hsa_circ_0000866	0	0	0	2	0	0	16:14627106..14627336:-	ENSG00000140694
hsa_circ_0000867	0	0	0	0	2	0	16:15703780..15703941:+	Null
hsa_circ_0000868	0	0	0	0	11	2	16:15714909..15715081:-	ENSG00000133392
hsa_circ_0000869	0	0	0	5	12	5	16:15714909..15715272:-	ENSG00000133392
hsa_circ_0000870	0	0	0	0	0	3	16:15717140..15718438:-	ENSG00000133392
hsa_circ_0000871	0	0	0	0	2	0	16:15720839..15721634:-	ENSG00000133392
hsa_circ_0000872	0	0	0	0	4	0	16:15726848..15727054:-	ENSG00000133392
hsa_circ_0000873	0	0	0	0	2	0	16:15726959..15732596:-	ENSG00000133392
hsa_circ_0000874	0	0	0	0	0	4	16:15726959..15735430:-	ENSG00000133392
hsa_circ_0000875	0	0	0	0	2	0	16:15732564..15753508:-	ENSG00000133392
hsa_circ_0000876	0	0	0	0	7	0	16:15732669..15735493:+	Null
hsa_circ_0000877	0	0	0	0	0	3	16:15738644..15740185:+	ENSG00000133392
hsa_circ_0000878	0	0	0	0	5	3	16:15750138..15753508:-	ENSG00000133392
hsa_circ_0000879	0	0	0	0	0	2	16:15753394..15756514:-	ENSG00000133392
hsa_circ_0000880	0	0	0	0	3	5	16:15763796..15778843:-	ENSG00000133392
hsa_circ_0000881	0	0	0	0	3	0	16:15771569..15786732:-	ENSG00000133392
hsa_circ_0000882	0	0	0	0	4	0	16:15776078..15786732:-	ENSG00000133392
hsa_circ_0000883	0	0	0	0	0	5	16:15782385..15786732:-	ENSG00000133392
hsa_circ_0000884	0	0	0	0	0	3	16:15822556..15823411:-	ENSG00000133392
hsa_circ_0000885	0	0	0	0	2	0	16:15823255..15838269:-	ENSG00000133392
hsa_circ_0000886	0	0	0	0	2	0	16:15823335..15838093:-	ENSG00000133392
hsa_circ_0000887	0	0	0	0	0	2	16:16007816..16016621:+	ENSG00000103222
hsa_circ_0000888	0	0	0	0	3	0	16:16007816..16036603:+	ENSG00000103222
hsa_circ_0000889	0	0	0	10	12	7	16:16007816..16102717:+	ENSG00000103222
hsa_circ_0000890	0	3	0	0	0	0	16:16052724..16056295:+	ENSG00000103222
hsa_circ_0000891	0	0	0	0	0	2	16:16086824..16090588:+	ENSG00000103222
hsa_circ_0000892	0	0	0	0	3	5	16:16106738..16111582:+	ENSG00000103222
hsa_circ_0000893	0	0	0	0	6	0	16:16111375..16111582:+	ENSG00000103222
hsa_circ_0000894	3	0	0	0	5	6	16:16124789..16125911:+	ENSG00000103222
hsa_circ_0000895	0	0	0	4	4	0	16:16141173..16142942:+	ENSG00000103222
hsa_circ_0000896	0	0	0	0	2	0	16:1625973..1641187:+	ENSG00000007545
hsa_circ_0000897	0	0	0	2	0	2	16:17258988..17259498:-	ENSG00000103489
hsa_circ_0000898	2	0	0	4	9	3	16:1809238..1809833:-	ENSG00000063854
hsa_circ_0000899	0	0	0	0	2	2	16:18782781..18788142:-	ENSG00000134419
hsa_circ_0000900	0	0	0	0	0	2	16:18839698..18842454:-	ENSG00000157106
hsa_circ_0000901	0	2	0	2	0	0	16:18841565..18845651:-	ENSG00000157106
hsa_circ_0000902	0	0	0	0	6	0	16:19616114..19647882:+	ENSG00000103544
hsa_circ_0000903	0	0	0	0	2	0	16:19644886..19652090:+	ENSG00000103544
hsa_circ_0000904	0	0	0	2	0	2	16:21962460..21976243:+	ENSG00000140740
hsa_circ_0000905	0	4	0	0	2	2	16:22225654..22225975:+	ENSG00000103319
hsa_circ_0000906	0	0	0	0	0	2	16:23079946..23082557:-	ENSG00000103404
hsa_circ_0000907	0	3	0	0	0	0	16:23102319..23108183:-	ENSG00000103404
hsa_circ_0000908	0	0	0	0	4	0	16:2317283..2317764:-	ENSG00000167972
hsa_circ_0000909	0	0	0	0	4	0	16:2317283..2319840:-	ENSG00000167972
hsa_circ_0000910	0	0	0	0	0	2	16:23413448..23417121:-	ENSG00000168434
hsa_circ_0000911	0	0	0	0	0	3	16:23529502..23529897:-	ENSG00000103356
hsa_circ_0000912	0	0	0	0	6	0	16:23621362..23623130:-	ENSG00000083093
hsa_circ_0000913	0	0	0	0	2	0	16:23621362..23638129:-	ENSG00000083093
hsa_circ_0000914	0	0	0	0	2	0	16:23988508..24035547:+	ENSG00000166501
hsa_circ_0000915	0	0	0	0	0	2	16:24750726..24777358:+	ENSG00000090905
hsa_circ_0000916	0	0	0	0	0	3	16:24968351..24970580:-	ENSG00000140750
hsa_circ_0000917	0	0	0	2	5	4	16:27213585..27215008:+	ENSG00000155666
hsa_circ_0000918	0	0	0	0	2	0	16:27340186..27346618:+	ENSG00000077238
hsa_circ_0000919	0	0	0	0	0	4	16:27462294..27463592:-	ENSG00000077235
hsa_circ_0000920	0	0	0	0	2	0	16:2759352..2759661:+	ENSG00000167978
hsa_circ_0000921	0	0	0	0	4	0	16:28101458..28101945:-	ENSG00000169180
hsa_circ_0000922	0	0	0	0	2	0	16:28166508..28169909:-	ENSG00000169180
hsa_circ_0000923	3	0	0	2	2	5	16:29833733..29834066:+	ENSG00000013364
hsa_circ_0000924	0	0	0	0	0	3	16:29835704..29836958:+	ENSG00000013364
hsa_circ_0000925	0	0	0	2	0	0	16:304304..314683:-	ENSG00000103126
hsa_circ_0000926	2	7	0	5	20	9	16:30664215..30666541:+	ENSG00000156860
hsa_circ_0000927	0	2	0	0	0	3	16:30664215..30667622:+	ENSG00000156860
hsa_circ_0000928	0	0	0	2	0	0	16:30704064..30704315:+	ENSG00000080603
hsa_circ_0000929	0	0	0	0	0	5	16:30716066..30716479:+	ENSG00000080603,ENSG00000282034
hsa_circ_0000930	0	0	0	4	9	7	16:30728966..30729572:+	ENSG00000080603,ENSG00000282034
hsa_circ_0000931	3	0	0	10	4	6	16:31090775..31091342:-	Null
hsa_circ_0000932	0	0	0	2	5	0	16:31722626..31723353:+	ENSG00000197302
hsa_circ_0000933	0	0	0	0	2	0	16:3476222..3479600:+	ENSG00000122390
hsa_circ_0000934	0	0	0	0	2	0	16:3536122..3536994:+	ENSG00000103351
hsa_circ_0000935	0	4	0	5	6	4	16:3850297..3851009:-	ENSG00000005339
hsa_circ_0000936	0	0	0	0	3	0	16:4261779..4262701:-	ENSG00000090447
hsa_circ_0000937	0	2	0	4	4	15	16:4332215..4333519:+	ENSG00000126603
hsa_circ_0000938	0	0	0	0	2	0	16:4466153..4469465:-	ENSG00000153406
hsa_circ_0000939	0	0	0	0	3	0	16:46674314..46677398:-	ENSG00000069329
hsa_circ_0000940	0	0	0	6	12	5	16:47497399..47515601:+	ENSG00000102893
hsa_circ_0000941	0	0	0	6	0	0	16:47497399..47547548:+	ENSG00000102893
hsa_circ_0000942	0	0	2	0	0	0	16:4811170..4812248:-	ENSG00000140632
hsa_circ_0000943	0	0	0	0	2	3	16:48277338..48303305:+	ENSG00000102910
hsa_circ_0000944	0	2	0	0	0	0	16:48548007..48562444:-	ENSG00000102921
hsa_circ_0000945	0	2	0	0	2	0	16:48553539..48562444:-	ENSG00000102921
hsa_circ_0000946	0	0	0	2	0	0	16:4884593..4884892:-	ENSG00000118898
hsa_circ_0000947	0	0	0	0	0	3	16:4885847..4885981:-	ENSG00000118898
hsa_circ_0000948	0	0	0	0	0	2	16:4885847..4885984:-	ENSG00000118898
hsa_circ_0000949	2	0	0	0	0	2	16:4900830..4901089:-	ENSG00000118898
hsa_circ_0000950	0	0	0	0	2	0	16:49626170..49638874:-	ENSG00000102935
hsa_circ_0000951	0	2	0	6	8	3	16:53141179..53157541:+	Null,ENSG00000177200
hsa_circ_0000952	0	0	0	0	6	0	16:53154447..53157541:+	Null,ENSG00000177200
hsa_circ_0000953	0	0	0	0	0	2	16:53155926..53157541:+	ENSG00000177200
hsa_circ_0000954	0	0	0	0	3	2	16:53254438..53274302:+	ENSG00000177200
hsa_circ_0000955	0	0	0	0	3	0	16:53844155..53888951:+	ENSG00000140718
hsa_circ_0000956	0	2	0	0	0	0	16:53873786..53879987:+	ENSG00000140718
hsa_circ_0000957	0	0	0	0	6	4	16:53873786..53888951:+	ENSG00000140718
hsa_circ_0000958	0	0	0	0	0	2	16:53933985..53937294:+	ENSG00000140718
hsa_circ_0000959	0	0	0	0	0	5	16:56626880..56636504:+	Null
hsa_circ_0000960	0	0	0	2	0	0	16:56626880..56639329:+	Null
hsa_circ_0000961	0	0	0	0	0	2	16:56626880..56658740:+	Null
hsa_circ_0000962	0	0	0	0	5	0	16:56626880..56670571:+	Null
hsa_circ_0000963	0	0	0	0	2	2	16:56626880..56683230:+	Null
hsa_circ_0000964	0	0	2	0	0	0	16:57164001..57173869:-	ENSG00000172775
hsa_circ_0000965	0	0	0	0	3	0	16:57521068..57526127:-	ENSG00000135736
hsa_circ_0000966	0	0	0	3	7	3	16:58559804..58560362:-	ENSG00000125107,Null
hsa_circ_0000967	0	0	0	0	2	0	16:58599236..58599511:-	ENSG00000125107
hsa_circ_0000968	0	0	0	0	2	0	16:66608309..66610003:+	ENSG00000140931
hsa_circ_0000969	0	0	0	0	0	3	16:66730112..66732505:-	ENSG00000135720
hsa_circ_0000970	0	0	0	0	2	0	16:67036639..67082339:+	ENSG00000067955
hsa_circ_0000971	0	0	0	0	3	0	16:67610824..67612121:+	ENSG00000102974
hsa_circ_0000972	0	0	0	3	2	0	16:67628370..67629533:+	ENSG00000102974
hsa_circ_0000973	0	0	0	0	6	5	16:67939886..67940478:-	ENSG00000213398
hsa_circ_0000974	0	0	2	12	10	12	16:68121987..68123121:+	ENSG00000072736
hsa_circ_0000975	0	10	0	15	28	16	16:68121987..68126610:+	ENSG00000072736
hsa_circ_0000976	0	0	0	0	2	0	16:68121987..68191775:+	ENSG00000072736
hsa_circ_0000977	0	2	0	0	0	0	16:68157869..68167015:+	ENSG00000072736
hsa_circ_0000978	0	0	0	0	5	0	16:68181475..68191775:+	ENSG00000072736
hsa_circ_0000979	0	0	0	0	6	0	16:68266593..68275249:+	ENSG00000103064
hsa_circ_0000980	0	0	3	3	0	0	16:69284048..69284244:+	ENSG00000168807
hsa_circ_0000981	0	0	0	4	4	0	16:69370483..69372355:-	ENSG00000132604
hsa_circ_0000982	0	4	0	0	0	0	16:69695136..69695379:+	ENSG00000102908
hsa_circ_0000983	0	0	0	0	3	0	16:70010751..70018097:-	ENSG00000255185,ENSG00000196696
hsa_circ_0000984	0	0	0	0	3	5	16:70463169..70463774:+	ENSG00000157353
hsa_circ_0000985	0	3	0	2	0	0	16:70565065..70567536:+	ENSG00000189091
hsa_circ_0000986	0	0	0	0	4	0	16:71658233..71679535:-	ENSG00000040199
hsa_circ_0000987	0	0	0	0	3	0	16:71745144..71745614:-	ENSG00000166747
hsa_circ_0000988	0	0	0	0	2	0	16:72088987..72090786:-	ENSG00000140830
hsa_circ_0000989	0	0	0	0	2	0	16:74456649..74459789:-	ENSG00000090863
hsa_circ_0000990	0	0	0	0	2	0	16:74457874..74459789:-	ENSG00000090863
hsa_circ_0000991	0	0	0	7	2	0	16:80684538..80685129:-	ENSG00000166446
hsa_circ_0000992	0	0	0	0	3	0	16:81854444..81859163:+	ENSG00000197943
hsa_circ_0000993	0	0	0	0	2	0	16:81895807..81905507:+	ENSG00000197943
hsa_circ_0000994	0	0	0	2	0	2	16:83906987..83912367:+	ENSG00000103150
hsa_circ_0000995	0	0	0	0	3	0	16:84101621..84102107:-	ENSG00000140943
hsa_circ_0000996	0	5	10	26	30	50	16:85633914..85634132:+	ENSG00000131149
hsa_circ_0000997	0	0	0	0	0	5	16:87342877..87347250:-	ENSG00000103264
hsa_circ_0000998	0	0	0	2	0	0	16:87417460..87418901:-	ENSG00000140948
hsa_circ_0000999	0	0	0	0	3	0	16:87748673..87762040:-	ENSG00000104731
hsa_circ_0001000	0	0	4	4	3	0	16:87975048..87984259:+	ENSG00000172530
hsa_circ_0001001	0	4	0	0	0	0	16:88018428..88038011:+	ENSG00000172530
hsa_circ_0001002	0	13	4	5	12	4	16:88027483..88038011:+	ENSG00000172530
hsa_circ_0001003	0	0	0	4	0	2	16:88033109..88038011:+	ENSG00000172530
hsa_circ_0001004	0	0	0	3	0	0	16:88608934..88611536:+	ENSG00000158545
hsa_circ_0001005	3	0	0	0	0	0	16:89098591..89102759:+	ENSG00000176715
hsa_circ_0001006	0	0	3	0	0	0	16:8929369..8930397:-	ENSG00000187555
hsa_circ_0001007	0	0	0	0	0	2	16:89305206..89317078:-	ENSG00000167522
hsa_circ_0001008	0	0	0	3	0	0	16:89531904..89544772:+	ENSG00000197912
hsa_circ_0001009	0	0	0	0	2	0	16:89895990..89900794:+	ENSG00000141002
hsa_circ_0001010	2	0	0	0	0	0	16:89907327..89908675:-	Null
hsa_circ_0001011	0	0	0	0	2	0	16:9106196..9106494:+	ENSG00000182831,ENSG00000263244
hsa_circ_0001012	0	0	0	0	0	3	16:98145..100509:-	ENSG00000103148
hsa_circ_0001013	0	0	0	3	0	0	17:10393085..10495101:-	Null
hsa_circ_0001014	0	0	0	0	2	0	17:12054889..12081530:+	ENSG00000065559
hsa_circ_0001015	0	0	0	5	0	0	17:12054889..12095694:+	ENSG00000065559
hsa_circ_0001016	0	0	0	0	0	2	17:12054889..12113360:+	ENSG00000065559
hsa_circ_0001017	0	0	0	0	2	0	17:12095575..12113360:+	ENSG00000065559
hsa_circ_0001018	0	0	0	0	8	5	17:12705128..12723008:+	ENSG00000141052
hsa_circ_0001019	0	0	0	0	2	0	17:1361092..1362008:-	ENSG00000108953
hsa_circ_0001020	0	0	0	0	2	0	17:14033552..14034416:-	Null
hsa_circ_0001021	0	0	0	2	0	0	17:15987266..15991104:-	ENSG00000214941
hsa_circ_0001022	0	0	0	0	2	0	17:16071409..16073569:-	ENSG00000141027
hsa_circ_0001023	0	0	0	0	4	0	17:16101250..16101805:-	ENSG00000141027
hsa_circ_0001024	0	0	0	0	2	0	17:16325800..16326905:+	Null
hsa_circ_0001025	0	0	0	0	0	2	17:1636709..1637062:-	ENSG00000074660
hsa_circ_0001026	0	0	0	0	0	2	17:17176426..17180669:+	ENSG00000133030
hsa_circ_0001027	0	0	0	2	0	7	17:17847639..17850952:-	ENSG00000175662
hsa_circ_0001028	0	0	0	0	2	0	17:18206815..18208375:+	ENSG00000091542
hsa_circ_0001029	0	0	0	0	2	0	17:1842803..1844686:+	ENSG00000132383
hsa_circ_0001030	0	0	0	3	0	0	17:19309885..19329647:+	ENSG00000072134
hsa_circ_0001031	0	2	3	9	22	8	17:20204333..20205912:+	ENSG00000128487
hsa_circ_0001032	0	0	0	0	4	0	17:21011151..21015899:-	ENSG00000124422
hsa_circ_0001033	0	0	0	0	0	2	17:21017942..21021226:-	ENSG00000124422
hsa_circ_0001034	0	0	0	0	0	2	17:2172658..2236637:-	ENSG00000070366
hsa_circ_0001035	0	0	0	0	4	5	17:2394043..2395454:-	ENSG00000070444
hsa_circ_0001036	0	0	0	0	3	0	17:27303367..27309272:+	ENSG00000109046
hsa_circ_0001037	0	0	0	2	0	0	17:28921688..28927063:-	ENSG00000109118
hsa_circ_0001038	0	0	0	0	0	2	17:29285992..29287716:-	ENSG00000108256
hsa_circ_0001039	0	0	0	2	4	2	17:30484214..30492753:+	ENSG00000108587
hsa_circ_0001040	0	0	0	2	3	0	17:30734897..30784892:+	Null
hsa_circ_0001041	0	3	0	0	0	0	17:31155983..31169997:+	ENSG00000196712
hsa_circ_0001042	3	0	0	0	0	0	17:319420..327579:-	ENSG00000181031
hsa_circ_0001043	0	0	0	5	0	0	17:31982999..31988497:+	ENSG00000178691
hsa_circ_0001044	0	0	0	0	2	0	17:31988320..31988497:+	ENSG00000178691
hsa_circ_0001045	0	0	0	0	2	0	17:32017972..32035639:+	ENSG00000185158
hsa_circ_0001046	0	0	0	2	0	2	17:32173831..32175362:+	ENSG00000126858
hsa_circ_0001047	0	0	0	0	2	0	17:35624397..35641975:+	ENSG00000006125
hsa_circ_0001048	0	0	0	0	4	0	17:35778888..35779323:-	ENSG00000271447
hsa_circ_0001049	0	0	0	2	0	0	17:35820024..35820437:+	ENSG00000270647
hsa_circ_0001050	0	0	0	0	0	2	17:36508897..36511455:-	Null,ENSG00000278259
hsa_circ_0001051	0	0	0	2	4	3	17:36509062..36511455:-	ENSG00000278259
hsa_circ_0001052	0	2	0	0	2	0	17:36952886..36953907:+	ENSG00000275700
hsa_circ_0001053	0	0	2	0	0	2	17:37437738..37444768:+	ENSG00000276234
hsa_circ_0001054	0	0	0	0	8	0	17:3814322..3816270:-	ENSG00000074356
hsa_circ_0001055	0	0	0	0	2	2	17:38361711..38368050:+	ENSG00000274211
hsa_circ_0001056	0	0	0	0	3	0	17:38361711..38377842:+	ENSG00000274211
hsa_circ_0001057	2	0	0	0	0	5	17:39684597..39686019:-	ENSG00000161395
hsa_circ_0001058	0	0	0	0	0	4	17:39708321..39709881:+	ENSG00000141736
hsa_circ_0001059	0	3	0	2	0	3	17:39708321..39710481:+	ENSG00000141736
hsa_circ_0001060	0	2	0	0	0	0	17:39709813..39710481:+	ENSG00000141736
hsa_circ_0001061	0	0	0	0	2	0	17:4051971..4064829:-	ENSG00000074755
hsa_circ_0001062	0	0	0	3	5	2	17:4066447..4072756:-	ENSG00000074755
hsa_circ_0001063	0	0	0	5	0	0	17:41501152..41501340:+	ENSG00000229732
hsa_circ_0001064	0	0	0	2	0	0	17:41501948..41502269:+	ENSG00000229732
hsa_circ_0001065	0	0	0	0	0	3	17:41503057..41505151:-	ENSG00000171401
hsa_circ_0001066	0	0	0	5	0	0	17:41503350..41503717:+	ENSG00000171401,Null
hsa_circ_0001067	0	0	0	0	0	6	17:41503643..41516964:-	Null
hsa_circ_0001068	2	0	0	0	0	0	17:41505152..41505474:-	ENSG00000171401
hsa_circ_0001069	0	0	0	3	0	4	17:41505188..41505339:-	ENSG00000171401
hsa_circ_0001070	7	0	0	0	0	0	17:41505188..41505363:-	ENSG00000171401
hsa_circ_0001071	0	0	0	2	0	0	17:41505316..41505477:-	ENSG00000171401
hsa_circ_0001072	0	0	0	0	0	3	17:41505340..41505477:-	ENSG00000171401
hsa_circ_0001073	0	0	0	0	0	2	17:41515885..41583455:-	Null
hsa_circ_0001074	0	0	0	0	3	0	17:41516104..41610979:-	Null
hsa_circ_0001075	0	2	0	0	0	0	17:41525191..41622511:-	Null
hsa_circ_0001076	0	0	10	0	0	0	17:41583760..41621091:-	Null
hsa_circ_0001077	0	0	0	0	3	0	17:42345559..42348520:-	ENSG00000168610
hsa_circ_0001078	0	0	0	2	0	0	17:42345559..42348539:-	ENSG00000168610
hsa_circ_0001079	0	0	0	0	4	0	17:4242256..4242448:-	ENSG00000185722
hsa_circ_0001080	0	0	0	0	3	0	17:42538339..42541206:+	ENSG00000108784
hsa_circ_0001081	0	4	2	0	0	4	17:42610108..42659552:+	Null
hsa_circ_0001082	0	0	0	2	0	0	17:42727635..42730918:-	ENSG00000108799
hsa_circ_0001083	0	0	0	4	6	0	17:4282798..4296814:-	ENSG00000132388
hsa_circ_0001084	0	0	0	3	2	0	17:4282798..4307123:-	ENSG00000132388
hsa_circ_0001085	0	0	0	0	0	2	17:43204216..43204530:+	Null
hsa_circ_0001086	0	2	0	0	0	0	17:44110729..44117704:-	ENSG00000108840
hsa_circ_0001087	0	0	0	0	0	3	17:45081644..45086652:+	ENSG00000136448
hsa_circ_0001088	2	4	2	0	3	6	17:45475100..45475726:-	ENSG00000225190
hsa_circ_0001089	0	0	0	0	0	2	17:45475100..45478147:-	ENSG00000225190
hsa_circ_0001090	0	0	0	0	0	2	17:46082441..46094701:-	ENSG00000120071
hsa_circ_0001091	8	0	3	11	7	4	17:46170855..46172232:-	ENSG00000120071
hsa_circ_0001092	0	0	0	0	2	0	17:46475200..46487140:+	ENSG00000260075
hsa_circ_0001093	0	0	0	2	0	0	17:4682502..4682952:-	ENSG00000141456
hsa_circ_0001094	0	3	0	0	0	0	17:47137152..47143982:-	ENSG00000004897
hsa_circ_0001095	0	0	0	0	4	0	17:47361378..47379253:+	ENSG00000178852
hsa_circ_0001096	0	2	0	2	7	7	17:47402132..47414919:+	ENSG00000178852
hsa_circ_0001097	0	0	0	0	0	2	17:47402132..47429961:+	ENSG00000178852
hsa_circ_0001098	0	2	0	0	0	5	17:47618350..47619164:+	ENSG00000141279
hsa_circ_0001099	0	3	0	0	0	0	17:47663089..47668410:+	ENSG00000108424
hsa_circ_0001100	0	0	0	0	0	2	17:48032156..48033944:-	ENSG00000005243
hsa_circ_0001101	0	0	0	5	5	4	17:49311312..49312042:-	ENSG00000198740
hsa_circ_0001102	0	0	0	0	5	0	17:49311312..49312845:-	ENSG00000198740
hsa_circ_0001103	0	0	0	0	0	3	17:50139263..50141373:-	ENSG00000108819
hsa_circ_0001104	30	0	15	0	0	0	17:50189377..50189732:-	ENSG00000108821
hsa_circ_0001105	0	0	2	0	0	0	17:50190090..50190905:-	ENSG00000108821
hsa_circ_0001106	2	0	0	0	0	0	17:50192797..50193047:-	ENSG00000108821
hsa_circ_0001107	0	0	3	0	0	0	17:50194581..50197757:-	ENSG00000108821
hsa_circ_0001108	0	0	8	0	0	0	17:50194721..50195100:-	ENSG00000108821
hsa_circ_0001109	0	0	7	0	0	0	17:50195232..50196528:-	ENSG00000108821
hsa_circ_0001110	0	0	16	0	0	0	17:50196316..50197217:+	ENSG00000108821,Null
hsa_circ_0001111	2	0	0	0	0	0	17:50196634..50197757:-	ENSG00000108821
hsa_circ_0001112	0	0	0	2	0	0	17:50736960..50746702:+	ENSG00000108848
hsa_circ_0001113	0	0	0	0	3	0	17:50982524..50985778:-	ENSG00000008294
hsa_circ_0001114	0	0	0	2	0	0	17:50990450..50993935:-	ENSG00000008294
hsa_circ_0001115	0	4	0	0	0	0	17:51041501..51056482:-	ENSG00000008294
hsa_circ_0001116	0	0	0	0	3	3	17:51217334..51225209:-	ENSG00000011258
hsa_circ_0001117	2	2	0	5	0	2	17:51263274..51268904:+	ENSG00000011260
hsa_circ_0001118	0	0	0	0	2	0	17:5433669..5438183:-	ENSG00000108561
hsa_circ_0001119	0	0	0	0	0	3	17:55072900..55081183:+	ENSG00000166263
hsa_circ_0001120	0	0	0	2	2	0	17:56901419..56904488:-	ENSG00000121060
hsa_circ_0001121	0	0	0	8	16	8	17:59353215..59353526:+	ENSG00000175155
hsa_circ_0001122	0	3	2	3	23	4	17:59731421..59738947:+	ENSG00000062716
hsa_circ_0001123	0	0	0	0	0	2	17:59731421..59773885:+	ENSG00000062716
hsa_circ_0001124	0	0	0	0	3	0	17:59764971..59773885:+	ENSG00000062716
hsa_circ_0001125	0	23	0	0	0	0	17:59811670..59914703:+	Null
hsa_circ_0001126	0	0	0	4	0	0	17:59910562..59936541:+	ENSG00000108443
hsa_circ_0001127	0	0	0	2	0	0	17:59935193..59940943:+	ENSG00000108443
hsa_circ_0001128	0	0	0	0	0	3	17:60269450..60271481:-	ENSG00000170832
hsa_circ_0001129	0	0	0	2	0	0	17:60633853..60648082:+	ENSG00000170836
hsa_circ_0001130	0	0	0	4	0	0	17:61919400..61925099:-	ENSG00000108506
hsa_circ_0001131	0	0	0	0	3	0	17:61921725..61925099:-	ENSG00000108506
hsa_circ_0001132	0	0	0	0	2	0	17:61982198..61985090:-	ENSG00000108510
hsa_circ_0001133	0	0	0	0	2	0	17:62010550..62063301:-	ENSG00000108510
hsa_circ_0001134	0	0	0	0	5	0	17:62029541..62035608:-	ENSG00000108510
hsa_circ_0001135	0	0	0	5	2	2	17:62033787..62035608:-	ENSG00000108510
hsa_circ_0001136	0	0	0	0	2	3	17:623533..627316:-	ENSG00000141252
hsa_circ_0001137	0	0	0	0	2	0	17:64052780..64053371:-	ENSG00000178607
hsa_circ_0001138	0	0	0	0	2	0	17:64212574..64214242:-	ENSG00000136478
hsa_circ_0001139	0	0	0	0	0	3	17:64348260..64352463:-	ENSG00000261371
hsa_circ_0001140	0	0	0	0	2	0	17:64348260..64353518:-	ENSG00000261371
hsa_circ_0001141	0	0	0	2	0	0	17:64757431..64757862:+	Null
hsa_circ_0001142	0	0	0	3	3	0	17:65743068..65750724:-	ENSG00000154240
hsa_circ_0001143	0	0	0	0	3	0	17:66027501..66030023:-	ENSG00000154240
hsa_circ_0001144	0	0	0	0	2	0	17:66027501..66070001:-	ENSG00000154240
hsa_circ_0001145	0	0	0	2	0	2	17:66062963..66096632:-	ENSG00000154240
hsa_circ_0001146	0	0	0	0	2	0	17:67151046..67178926:-	ENSG00000198265
hsa_circ_0001147	0	0	0	0	5	0	17:67928355..67932019:+	ENSG00000171634
hsa_circ_0001148	0	0	0	0	0	5	17:67945409..67948306:+	ENSG00000171634
hsa_circ_0001149	2	4	4	15	21	13	17:67945409..67975958:+	ENSG00000171634
hsa_circ_0001150	0	0	0	0	0	2	17:69028535..69029227:-	ENSG00000154258
hsa_circ_0001151	0	0	0	3	0	0	17:69155019..69155925:-	ENSG00000154263
hsa_circ_0001152	0	0	0	0	3	2	17:69273943..69284072:-	ENSG00000154265
hsa_circ_0001153	0	0	0	0	2	0	17:73235476..73236995:+	ENSG00000141219
hsa_circ_0001154	0	2	0	2	0	0	17:7499039..7499491:+	ENSG00000181222
hsa_circ_0001155	0	0	0	3	4	0	17:75042181..75042659:-	ENSG00000167863
hsa_circ_0001156	0	0	0	0	3	0	17:75242336..75243570:-	ENSG00000125447
hsa_circ_0001157	0	0	0	0	2	0	17:75937566..75938232:-	ENSG00000188878
hsa_circ_0001158	0	0	0	3	0	0	17:76007060..76010543:-	ENSG00000167880
hsa_circ_0001159	0	0	0	2	0	0	17:76011576..76012089:-	ENSG00000167880
hsa_circ_0001160	0	3	0	0	3	0	17:77402059..77402703:+	ENSG00000184640
hsa_circ_0001161	0	0	0	0	7	0	17:78079395..78087093:+	ENSG00000078687
hsa_circ_0001162	0	0	0	0	2	0	17:78086503..78087093:+	ENSG00000078687
hsa_circ_0001163	0	0	0	2	3	0	17:79077430..79077864:+	ENSG00000167280
hsa_circ_0001164	0	0	0	0	0	2	17:7945728..7945986:+	ENSG00000170037
hsa_circ_0001165	0	0	0	2	2	0	17:79644137..79646334:-	Null
hsa_circ_0001166	2	0	0	0	6	3	17:80048583..80050283:+	ENSG00000141519
hsa_circ_0001167	0	0	0	0	0	3	17:80891720..80893865:+	ENSG00000141564
hsa_circ_0001168	0	0	0	2	0	0	17:81270525..81271024:-	ENSG00000157637
hsa_circ_0001169	0	0	0	0	2	0	17:81280609..81284895:-	ENSG00000157637
hsa_circ_0001170	3	2	2	2	4	2	17:81693654..81694853:+	ENSG00000185359
hsa_circ_0001171	0	0	0	0	5	0	17:81855142..81855586:-	ENSG00000185624
hsa_circ_0001172	0	0	0	7	2	0	17:8238031..8238629:-	ENSG00000178971
hsa_circ_0001173	0	0	0	2	3	3	17:82563354..82568201:+	ENSG00000141568
hsa_circ_0001174	0	0	0	4	2	0	17:82563354..82571870:+	ENSG00000141568
hsa_circ_0001175	0	0	0	0	2	0	17:82763965..82772507:+	ENSG00000141556
hsa_circ_0001176	0	0	0	3	3	4	17:82763965..82781721:+	ENSG00000141556
hsa_circ_0001177	0	0	0	0	0	2	17:82884145..82911789:+	ENSG00000141556
hsa_circ_0001178	0	6	0	0	0	0	17:83084938..83085323:+	ENSG00000176845
hsa_circ_0001179	2	0	0	0	0	0	17:9022311..9023391:+	ENSG00000065320
hsa_circ_0001180	0	0	0	0	2	0	17:9940126..9946983:-	ENSG00000007237
hsa_circ_0001181	0	0	2	0	0	0	18:10534466..10550254:+	ENSG00000134265
hsa_circ_0001182	0	0	0	2	0	0	18:12009883..12014373:+	ENSG00000141401
hsa_circ_0001183	0	10	0	13	7	0	18:12999421..13019206:+	ENSG00000101639
hsa_circ_0001184	0	4	0	4	4	3	18:12999421..13030608:+	ENSG00000101639
hsa_circ_0001185	0	5	0	0	0	0	18:12999421..13042334:+	ENSG00000101639
hsa_circ_0001186	0	0	0	3	0	0	18:13681605..13682105:-	ENSG00000177150
hsa_circ_0001187	0	0	0	0	3	0	18:20991176..21020239:-	ENSG00000067900
hsa_circ_0001188	0	0	0	0	2	0	18:21039472..21049880:-	ENSG00000067900
hsa_circ_0001189	0	0	0	0	2	0	18:21536042..21568094:-	ENSG00000141446
hsa_circ_0001190	0	4	0	12	9	8	18:21765772..21779685:+	ENSG00000101752
hsa_circ_0001191	0	2	0	0	3	0	18:21765772..21819646:+	ENSG00000101752
hsa_circ_0001192	0	0	0	2	0	0	18:21791374..21804014:+	ENSG00000101752
hsa_circ_0001193	0	2	0	2	0	0	18:22989221..23001729:+	ENSG00000101773
hsa_circ_0001194	0	3	0	0	0	0	18:22990937..23001729:+	ENSG00000101773
hsa_circ_0001195	0	0	0	2	2	0	18:24064140..24069271:+	ENSG00000168234
hsa_circ_0001196	0	0	0	0	3	2	18:24064140..24083081:+	ENSG00000168234
hsa_circ_0001197	0	0	0	0	0	3	18:25322008..25327448:-	ENSG00000198795
hsa_circ_0001198	0	3	0	0	0	0	18:26032399..26057742:-	ENSG00000141380
hsa_circ_0001199	0	0	0	3	4	2	18:2890561..2892486:+	ENSG00000132205
hsa_circ_0001200	0	0	0	0	4	0	18:29234877..29285015:-	Null
hsa_circ_0001201	0	0	0	3	0	3	18:31006907..31018800:-	ENSG00000134762
hsa_circ_0001202	0	2	2	5	8	9	18:32111754..32113860:+	ENSG00000134758
hsa_circ_0001203	0	2	0	0	0	0	18:32111754..32124845:+	ENSG00000134758
hsa_circ_0001204	0	0	0	0	0	3	18:35696216..35712110:-	Null
hsa_circ_0001205	0	0	0	0	4	0	18:35846281..35852268:-	Null
hsa_circ_0001206	0	0	0	0	2	0	18:36122052..36127016:-	ENSG00000141424
hsa_circ_0001207	0	0	0	3	0	0	18:36141137..36160015:+	ENSG00000134759
hsa_circ_0001208	0	3	0	0	0	0	18:36142281..36160015:+	ENSG00000134759
hsa_circ_0001209	0	4	0	2	0	0	18:36195257..36203189:+	ENSG00000075643
hsa_circ_0001210	0	0	0	0	2	0	18:36658075..36693423:+	ENSG00000134775
hsa_circ_0001211	0	0	0	0	2	0	18:36681436..36693423:+	ENSG00000134775
hsa_circ_0001212	0	0	0	0	4	0	18:44701175..44701832:+	ENSG00000152217
hsa_circ_0001213	0	0	0	0	2	2	18:44701175..44759103:+	ENSG00000152217,Null
hsa_circ_0001214	0	0	0	0	2	0	18:44869230..44953340:+	ENSG00000152217
hsa_circ_0001215	0	0	0	8	18	22	18:44949881..44953340:+	ENSG00000152217
hsa_circ_0001216	0	0	0	0	0	2	18:46890580..46891054:-	ENSG00000078043
hsa_circ_0001217	0	3	0	3	7	3	18:46890580..46903635:-	Null
hsa_circ_0001218	0	0	0	0	8	2	18:46946057..46946923:+	ENSG00000167216
hsa_circ_0001219	0	0	0	0	4	0	18:47865059..47870564:-	ENSG00000175387
hsa_circ_0001220	0	10	0	2	5	0	18:47865059..47896809:-	ENSG00000175387
hsa_circ_0001221	0	0	0	0	2	0	18:49286434..49379758:-	ENSG00000141627
hsa_circ_0001222	0	2	0	0	0	0	18:49331864..49379758:-	ENSG00000141627
hsa_circ_0001223	0	3	0	2	0	0	18:49363161..49379758:-	ENSG00000141627
hsa_circ_0001224	0	0	0	0	5	0	18:51058125..51059916:+	ENSG00000141646
hsa_circ_0001225	0	0	0	0	3	0	18:54159765..54205157:-	ENSG00000134046
hsa_circ_0001226	0	0	0	0	2	0	18:54271360..54277855:+	ENSG00000101751
hsa_circ_0001227	0	0	0	0	3	0	18:54271360..54284013:+	ENSG00000101751
hsa_circ_0001228	0	0	0	3	0	0	18:54277703..54287411:+	ENSG00000101751
hsa_circ_0001229	0	0	0	0	4	0	18:56717964..56758953:+	ENSG00000091157
hsa_circ_0001230	0	0	0	2	7	3	18:56756583..56758953:+	ENSG00000091157
hsa_circ_0001231	0	0	0	0	2	0	18:57706490..57761939:-	Null
hsa_circ_0001232	0	0	0	3	0	0	18:57731627..57731832:-	ENSG00000081923,Null
hsa_circ_0001233	0	0	0	2	2	0	18:57731627..57761939:-	ENSG00000081923,Null
hsa_circ_0001234	0	7	0	0	0	0	18:58165788..58252054:+	ENSG00000049759
hsa_circ_0001235	0	0	0	2	6	8	18:58918271..58920633:+	ENSG00000074657
hsa_circ_0001236	0	7	0	2	0	0	18:58934433..58953799:+	ENSG00000074657
hsa_circ_0001237	0	0	0	4	6	0	18:62072673..62095950:-	ENSG00000197563
hsa_circ_0001238	0	0	0	2	3	0	18:62539681..62550460:+	ENSG00000141664
hsa_circ_0001239	0	0	0	0	4	0	18:6263947..6312056:-	ENSG00000154655
hsa_circ_0001240	0	0	0	3	0	0	18:6301903..6312056:-	ENSG00000154655
hsa_circ_0001241	0	0	0	0	2	0	18:69010934..69054133:+	ENSG00000150636
hsa_circ_0001242	0	0	0	0	2	0	18:74630967..74641122:+	ENSG00000215421
hsa_circ_0001243	0	0	0	0	2	5	18:75285448..75288648:+	ENSG00000179981
hsa_circ_0001244	3	0	0	0	4	4	18:76441245..76443211:-	ENSG00000101493
hsa_circ_0001245	0	2	0	0	4	3	18:76849526..76851939:+	ENSG00000130856
hsa_circ_0001246	0	0	0	0	2	0	18:76849526..76868863:+	ENSG00000130856
hsa_circ_0001247	0	5	0	2	2	5	18:76849526..76881512:+	ENSG00000130856
hsa_circ_0001248	0	0	0	2	0	0	18:76927037..76960855:+	ENSG00000130856
hsa_circ_0001249	0	0	0	2	0	0	18:79096476..79126375:+	ENSG00000166377
hsa_circ_0001250	0	0	0	0	2	0	18:79096476..79154555:+	ENSG00000166377
hsa_circ_0001251	0	0	0	0	0	2	18:79096476..79176907:+	ENSG00000166377
hsa_circ_0001252	0	3	0	0	3	3	18:79410403..79411501:+	ENSG00000131196
hsa_circ_0001253	0	2	0	0	0	0	18:79410403..79433738:+	ENSG00000131196
hsa_circ_0001254	4	4	0	0	0	3	18:79728907..79736521:+	ENSG00000060069
hsa_circ_0001255	0	0	0	0	0	3	18:8113486..8143779:+	ENSG00000173482
hsa_circ_0001256	0	0	0	0	2	0	18:8714139..8718648:+	Null,ENSG00000168502
hsa_circ_0001257	0	0	0	0	6	0	18:8714139..8720496:+	ENSG00000168502,Null
hsa_circ_0001258	0	0	0	7	12	4	18:8718424..8720496:+	ENSG00000168502
hsa_circ_0001259	0	0	0	0	0	4	18:8783530..8784843:+	ENSG00000168502
hsa_circ_0001260	0	7	0	14	32	20	18:9182382..9221999:+	ENSG00000101745
hsa_circ_0001261	0	0	0	3	0	3	18:9195551..9221999:+	ENSG00000101745
hsa_circ_0001262	0	0	0	0	2	0	18:9204476..9221999:+	ENSG00000101745
hsa_circ_0001263	0	2	0	0	0	0	18:9208657..9221999:+	ENSG00000101745
hsa_circ_0001264	0	0	0	0	0	3	18:9367488..9388140:+	Null
hsa_circ_0001265	0	3	0	4	5	4	18:9524594..9525851:+	ENSG00000017797
hsa_circ_0001266	0	6	0	4	10	0	18:9583117..9595102:-	ENSG00000154845
hsa_circ_0001267	0	2	0	4	5	5	18:9583117..9595153:-	ENSG00000154845
hsa_circ_0001268	0	0	0	3	0	0	18:9775278..9815222:+	ENSG00000168461
hsa_circ_0001269	0	12	0	3	9	0	18:9931810..9937066:+	ENSG00000101558
hsa_circ_0001270	0	0	0	0	0	2	19:1032392..1032696:+	ENSG00000064666
hsa_circ_0001271	0	0	0	0	2	0	19:1036130..1036562:+	ENSG00000064666
hsa_circ_0001272	0	0	0	0	2	0	19:10795372..10798572:+	ENSG00000079805
hsa_circ_0001273	0	0	0	0	2	0	19:10904951..10909207:+	ENSG00000142453
hsa_circ_0001274	0	0	0	3	0	5	19:10913877..10916777:+	ENSG00000142453
hsa_circ_0001275	0	0	0	2	0	0	19:11059753..11060187:+	ENSG00000127616
hsa_circ_0001276	0	0	0	2	0	0	19:11120092..11120522:+	ENSG00000130164
hsa_circ_0001277	0	0	0	0	6	0	19:11175902..11176817:-	ENSG00000197256
hsa_circ_0001278	0	0	0	9	11	20	19:11178345..11178720:-	ENSG00000197256
hsa_circ_0001279	0	0	0	0	2	4	19:11245563..11245878:-	ENSG00000130158
hsa_circ_0001280	0	0	0	4	3	0	19:11335447..11335783:-	ENSG00000105514
hsa_circ_0001281	0	0	0	0	11	0	19:1147309..1154402:-	ENSG00000064932
hsa_circ_0001282	0	0	0	5	4	0	19:11513056..11514221:-	ENSG00000130159
hsa_circ_0001283	0	0	0	4	0	0	19:11546675..11546969:+	ENSG00000130176
hsa_circ_0001284	0	0	0	0	0	2	19:11546675..11547907:+	ENSG00000130176
hsa_circ_0001285	0	0	0	2	2	2	19:11722954..11725327:-	ENSG00000197933
hsa_circ_0001286	0	0	0	0	2	0	19:12524796..12528696:-	Null
hsa_circ_0001287	0	0	0	0	0	6	19:12526920..12528696:-	ENSG00000269693,ENSG00000249709
hsa_circ_0001288	0	0	0	0	3	0	19:12672847..12673316:+	ENSG00000123154
hsa_circ_0001289	0	0	0	0	4	0	19:1271329..1272051:+	ENSG00000099622
hsa_circ_0001290	0	0	0	0	0	2	19:12792307..12792484:-	ENSG00000095066
hsa_circ_0001291	0	6	0	7	25	8	19:12928342..12928847:-	ENSG00000179115
hsa_circ_0001292	0	0	0	10	5	6	19:13025021..13025552:+	ENSG00000008441
hsa_circ_0001293	0	0	0	0	2	0	19:13912323..13913638:+	ENSG00000132024
hsa_circ_0001294	0	0	0	2	0	0	19:14402597..14404562:+	ENSG00000123146
hsa_circ_0001295	0	0	0	5	3	4	19:14458031..14458375:+	ENSG00000123143
hsa_circ_0001296	0	0	0	2	0	0	19:15695936..15697070:+	ENSG00000186204
hsa_circ_0001297	0	0	0	0	0	2	19:16081913..16086540:+	ENSG00000167460
hsa_circ_0001298	4	0	3	9	2	9	19:17101660..17102557:+	ENSG00000099331
hsa_circ_0001299	0	0	0	0	2	0	19:17197792..17200829:+	ENSG00000099331
hsa_circ_0001300	0	2	0	0	0	0	19:17200293..17200829:+	ENSG00000099331
hsa_circ_0001301	0	2	0	0	2	4	19:17276495..17276909:+	ENSG00000269307,ENSG00000105393
hsa_circ_0001302	0	0	0	2	0	0	19:18147443..18147624:+	ENSG00000099308
hsa_circ_0001303	0	3	0	0	3	0	19:18537601..18538433:-	ENSG00000105701
hsa_circ_0001304	4	2	0	6	12	9	19:18537601..18538436:-	ENSG00000105701
hsa_circ_0001305	0	2	0	13	16	14	19:18539371..18539720:-	ENSG00000105701
hsa_circ_0001306	0	0	0	0	2	0	19:18573293..18573748:+	ENSG00000221983
hsa_circ_0001307	0	0	0	0	2	0	19:19492306..19492712:+	ENSG00000167491
hsa_circ_0001308	0	0	2	0	4	0	19:19640085..19640571:-	ENSG00000089639
hsa_circ_0001309	0	0	0	0	0	2	19:19645874..19646347:-	ENSG00000105726
hsa_circ_0001310	0	0	0	0	2	0	19:19878481..19933302:+	Null
hsa_circ_0001311	0	0	0	0	0	2	19:20645684..20646405:-	ENSG00000188171,ENSG00000269110
hsa_circ_0001312	0	2	0	4	3	3	19:21033456..21034184:+	ENSG00000118620
hsa_circ_0001313	0	0	0	0	3	0	19:2137727..2138714:-	ENSG00000065000
hsa_circ_0001314	0	5	0	19	51	33	19:21974729..21988909:-	ENSG00000160321
hsa_circ_0001315	0	33	2	11	11	5	19:23358430..23362725:-	ENSG00000167232
hsa_circ_0001316	0	2	0	2	0	0	19:23373742..23374764:-	ENSG00000167232
hsa_circ_0001317	0	3	0	0	0	0	19:23807826..23808814:+	ENSG00000233836
hsa_circ_0001318	0	4	0	3	0	2	19:23831597..23833521:+	Null
hsa_circ_0001319	0	2	0	0	0	0	19:29971193..29986417:+	ENSG00000105176
hsa_circ_0001320	0	4	0	4	9	4	19:29985223..29986417:+	ENSG00000105176
hsa_circ_0001321	0	0	0	2	0	0	19:34194478..34196763:+	ENSG00000257103
hsa_circ_0001322	0	0	0	0	2	0	19:34327421..34330347:+	ENSG00000166398
hsa_circ_0001323	0	3	0	2	0	3	19:34430576..34434968:+	ENSG00000126261
hsa_circ_0001324	0	0	0	2	0	0	19:34431861..34438766:+	ENSG00000126261
hsa_circ_0001325	0	0	0	0	0	2	19:34431861..34467014:+	ENSG00000126261
hsa_circ_0001326	0	0	0	3	3	10	19:3623688..3624162:-	ENSG00000105298
hsa_circ_0001327	0	0	0	0	3	0	19:3656405..3662001:-	ENSG00000186111
hsa_circ_0001328	0	3	0	0	10	4	19:3660966..3662001:-	ENSG00000186111
hsa_circ_0001329	0	0	0	3	2	0	19:37199400..37207254:-	ENSG00000245680
hsa_circ_0001330	0	0	0	0	11	5	19:38141184..38142710:+	ENSG00000105738
hsa_circ_0001331	0	0	0	0	2	0	19:39392464..39393637:+	ENSG00000063322
hsa_circ_0001332	3	0	0	0	0	0	19:39453356..39453521:+	ENSG00000196235
hsa_circ_0001333	0	0	0	2	0	0	19:39877663..39893527:-	ENSG00000275395
hsa_circ_0001334	0	0	0	0	2	0	19:39885673..39899697:-	ENSG00000275395
hsa_circ_0001335	0	0	0	0	0	2	19:40241938..40242687:-	ENSG00000105221
hsa_circ_0001336	0	0	0	2	4	3	19:40583398..40583717:+	ENSG00000160410
hsa_circ_0001337	0	0	0	0	0	2	19:40623604..40624082:+	ENSG00000090006
hsa_circ_0001338	0	0	0	0	0	2	19:40705096..40705447:-	ENSG00000123815
hsa_circ_0001339	0	0	0	3	0	0	19:40733160..40733364:+	ENSG00000086544
hsa_circ_0001340	2	3	0	2	3	2	19:40736986..40737769:+	ENSG00000086544
hsa_circ_0001341	0	0	0	0	3	0	19:41248514..41248820:+	ENSG00000167601
hsa_circ_0001342	0	0	0	0	6	0	19:41341883..41342247:-	ENSG00000105329
hsa_circ_0001343	0	0	0	0	0	2	19:41378281..41378519:+	ENSG00000142046,ENSG00000255730
hsa_circ_0001344	0	3	0	0	0	0	19:44793474..44794281:+	ENSG00000142273
hsa_circ_0001345	2	0	0	0	4	0	19:45025329..45025737:+	ENSG00000104856
hsa_circ_0001346	0	0	0	5	7	9	19:45263113..45263367:+	ENSG00000007047
hsa_circ_0001347	0	0	0	0	0	3	19:45263113..45266281:+	ENSG00000007047
hsa_circ_0001348	0	0	0	0	0	2	19:45264684..45266281:+	ENSG00000007047
hsa_circ_0001349	0	0	0	2	0	0	19:45277923..45278615:+	ENSG00000007047
hsa_circ_0001350	0	0	0	0	0	2	19:45280374..45280734:+	ENSG00000007047
hsa_circ_0001351	0	0	0	2	0	0	19:45306738..45307599:+	ENSG00000104879
hsa_circ_0001352	4	0	0	0	0	0	19:45398005..45398339:-	ENSG00000104881
hsa_circ_0001353	0	0	0	0	3	0	19:45517663..45518094:+	ENSG00000125753
hsa_circ_0001354	0	0	0	0	4	7	19:45521322..45522818:+	ENSG00000125753
hsa_circ_0001355	0	0	0	0	2	0	19:45522168..45522818:+	ENSG00000125753
hsa_circ_0001356	0	0	0	0	0	2	19:45854175..45854507:-	ENSG00000125755
hsa_circ_0001357	0	0	0	0	0	2	19:46320443..46334986:+	ENSG00000124440
hsa_circ_0001358	0	0	0	2	4	5	19:46329207..46331273:+	ENSG00000124440
hsa_circ_0001359	0	0	0	0	3	0	19:46375604..46376574:+	ENSG00000011485
hsa_circ_0001360	0	0	0	0	4	2	19:46918488..46922356:+	Null
hsa_circ_0001361	0	10	0	0	0	0	19:46918488..46937408:+	Null
hsa_circ_0001362	24	7	4	7	18	14	19:47264603..47264946:+	ENSG00000105321
hsa_circ_0001363	0	0	0	2	2	2	19:47362476..47362693:+	ENSG00000134815
hsa_circ_0001364	0	0	0	12	3	5	19:47416652..47417350:-	ENSG00000105419
hsa_circ_0001365	0	0	0	0	5	0	19:47681976..47695474:+	ENSG00000063169
hsa_circ_0001366	0	0	0	0	8	0	19:47725812..47726224:+	ENSG00000024422
hsa_circ_0001367	0	0	0	3	0	0	19:48575941..48587437:+	ENSG00000088002
hsa_circ_0001368	0	0	0	0	0	2	19:48913011..48913564:+	ENSG00000104805
hsa_circ_0001369	0	0	0	0	2	0	19:49090291..49090520:+	ENSG00000104852
hsa_circ_0001370	0	0	0	0	4	0	19:49599272..49601918:+	ENSG00000126464
hsa_circ_0001371	0	0	0	2	0	0	19:49997504..49998014:-	ENSG00000105053
hsa_circ_0001372	0	0	0	0	3	0	19:5016257..5041251:+	ENSG00000127663
hsa_circ_0001373	0	0	0	0	0	2	19:50216185..50217771:+	ENSG00000105357
hsa_circ_0001374	0	2	0	4	0	2	19:50398851..50399484:+	ENSG00000062822
hsa_circ_0001375	0	0	0	3	3	8	19:5047476..5082504:+	ENSG00000127663
hsa_circ_0001376	0	0	0	0	0	2	19:52076044..52089002:-	ENSG00000197608
hsa_circ_0001377	0	0	0	3	6	0	19:52282111..52283413:+	ENSG00000196214
hsa_circ_0001378	0	0	0	3	0	0	19:52373111..52374427:+	ENSG00000221923
hsa_circ_0001379	0	0	0	0	2	0	19:52553107..52556050:+	ENSG00000198482
hsa_circ_0001380	0	0	0	0	2	0	19:52574077..52584197:+	ENSG00000167562
hsa_circ_0001381	0	0	0	0	2	0	19:52655561..52660843:-	ENSG00000167766
hsa_circ_0001382	0	0	0	0	3	0	19:52778826..52833627:-	Null
hsa_circ_0001383	0	2	0	0	3	0	19:53380722..53384056:+	ENSG00000203326
hsa_circ_0001384	0	0	0	2	0	2	19:53380722..53385027:+	ENSG00000203326
hsa_circ_0001385	0	0	5	0	0	0	19:54222943..54280299:-	Null
hsa_circ_0001386	5	0	3	0	0	0	19:54574076..54631107:+	Null
hsa_circ_0001387	0	0	0	0	3	0	19:54594665..54631306:+	Null
hsa_circ_0001388	0	0	2	0	0	0	19:54633016..54697945:+	Null
hsa_circ_0001389	0	0	0	0	3	0	19:54636732..54667793:+	Null
hsa_circ_0001390	0	0	0	0	0	6	19:55245120..55245678:-	ENSG00000105063
hsa_circ_0001391	0	0	0	0	0	2	19:5591748..5613527:-	ENSG00000130254
hsa_circ_0001392	2	0	2	8	12	11	19:5604583..5604936:-	ENSG00000130254
hsa_circ_0001393	0	0	0	0	3	0	19:56576713..56578278:+	ENSG00000197016
hsa_circ_0001394	0	2	0	0	4	0	19:57455653..57456182:-	ENSG00000268163
hsa_circ_0001395	0	0	0	0	0	4	19:57776543..57780146:+	ENSG00000083828
hsa_circ_0001396	0	0	0	2	0	6	19:57925623..57928047:-	ENSG00000196724
hsa_circ_0001397	0	0	0	3	7	2	19:58260851..58263676:+	ENSG00000198131
hsa_circ_0001398	0	0	0	3	0	0	19:6702127..6702579:-	ENSG00000125730
hsa_circ_0001399	0	0	0	3	0	2	19:8337795..8339167:-	ENSG00000186994
hsa_circ_0001400	0	0	0	3	9	0	19:8455405..8463686:+	ENSG00000099783
hsa_circ_0001401	0	0	0	0	0	3	19:8468774..8474244:+	ENSG00000099783
hsa_circ_0001402	0	0	0	2	0	0	19:8896811..8902222:-	ENSG00000181143
hsa_circ_0001403	0	0	0	2	0	0	19:9566336..9568175:-	ENSG00000197961
hsa_circ_0001404	0	0	0	0	3	0	19:9652953..9660874:-	ENSG00000171466
hsa_circ_0001405	0	0	0	0	0	2	19:9656547..9660874:-	ENSG00000171466
hsa_circ_0001406	0	0	0	0	3	0	19:9656547..9691269:-	Null
hsa_circ_0001407	0	3	0	0	0	0	19:9659379..9693820:-	Null
hsa_circ_0001408	0	0	0	0	0	4	19:9992827..9993806:-	ENSG00000080573
hsa_circ_0001409	0	0	0	0	4	0	1:100906852..100921841:+	ENSG00000162695
hsa_circ_0001410	0	0	0	0	3	4	1:10095461..10105744:+	ENSG00000130939
hsa_circ_0001411	0	0	0	0	2	0	1:10134988..10137205:+	ENSG00000130939
hsa_circ_0001412	0	0	0	19	11	9	1:103565435..103575540:+	ENSG00000240038
hsa_circ_0001413	0	0	0	0	3	0	1:108148279..108161293:-	ENSG00000085491
hsa_circ_0001414	0	0	0	2	0	0	1:108885275..108904254:+	ENSG00000121957
hsa_circ_0001415	0	0	0	2	0	0	1:109409928..109415363:-	ENSG00000143106
hsa_circ_0001416	0	0	0	0	4	0	1:109659790..109690564:+	Null
hsa_circ_0001417	0	0	0	0	0	6	1:109661165..109671583:+	Null
hsa_circ_0001418	0	0	0	6	0	2	1:109661165..109690564:+	Null
hsa_circ_0001419	0	0	0	0	9	0	1:109665011..109690564:+	Null
hsa_circ_0001420	0	0	0	0	2	0	1:110891392..110892533:+	ENSG00000143119
hsa_circ_0001421	0	0	0	0	3	0	1:111981621..111982798:-	ENSG00000171385
hsa_circ_0001422	0	0	0	0	0	2	1:112653598..112659779:+	ENSG00000116489
hsa_circ_0001423	0	0	0	0	3	0	1:113710254..113758733:-	ENSG00000116793
hsa_circ_0001424	0	0	0	0	2	0	1:113829592..113834439:-	ENSG00000134242
hsa_circ_0001425	0	3	5	2	2	0	1:114463104..114464388:-	ENSG00000197323
hsa_circ_0001426	0	0	0	0	2	0	1:115659641..115664268:+	ENSG00000173218
hsa_circ_0001427	0	0	0	0	0	2	1:11658267..11658871:+	ENSG00000132879
hsa_circ_0001428	0	8	0	5	11	0	1:117402186..117405645:+	ENSG00000198162
hsa_circ_0001429	2	12	3	15	16	7	1:117402186..117414831:+	ENSG00000198162
hsa_circ_0001430	4	22	6	18	32	15	1:117402186..117420649:+	ENSG00000198162
hsa_circ_0001431	5	11	10	11	11	4	1:117402186..117442325:+	ENSG00000198162
hsa_circ_0001432	0	0	0	2	0	0	1:117402186..117466427:+	ENSG00000198162
hsa_circ_0001433	0	0	0	0	0	3	1:117456085..117502970:+	ENSG00000198162,Null
hsa_circ_0001434	0	0	0	3	0	3	1:117460489..117502970:+	ENSG00000198162
hsa_circ_0001435	0	0	0	3	2	7	1:12001401..12002103:+	ENSG00000116688
hsa_circ_0001436	2	3	3	8	22	8	1:1223244..1223968:-	ENSG00000078808
hsa_circ_0001437	0	0	0	2	4	0	1:12275825..12278038:+	ENSG00000048707
hsa_circ_0001438	0	0	0	0	0	2	1:12299202..12308641:+	ENSG00000048707
hsa_circ_0001439	0	0	0	0	0	2	1:12578718..12579412:-	ENSG00000162496
hsa_circ_0001440	0	0	0	0	0	2	1:12578718..12580666:-	ENSG00000162496
hsa_circ_0001441	0	0	0	0	3	0	1:13715541..13742157:+	ENSG00000116731
hsa_circ_0001442	0	0	0	0	2	0	1:13731000..13742157:+	ENSG00000116731
hsa_circ_0001443	0	0	0	0	4	5	1:13769118..13782831:+	ENSG00000116731
hsa_circ_0001444	0	0	0	3	8	9	1:13773078..13782831:+	ENSG00000116731
hsa_circ_0001445	0	0	0	0	4	14	1:13778418..13782831:+	ENSG00000116731
hsa_circ_0001446	0	0	0	5	0	3	1:145771711..145788966:-	ENSG00000265491
hsa_circ_0001447	0	0	0	0	0	2	1:145839890..145842477:+	ENSG00000186141
hsa_circ_0001448	0	0	0	0	2	0	1:145974825..145975436:+	ENSG00000121851
hsa_circ_0001449	0	2	0	0	0	0	1:146968448..146972960:+	ENSG00000268043
hsa_circ_0001450	0	0	0	3	0	0	1:147252623..147259918:+	ENSG00000131778
hsa_circ_0001451	7	12	4	3	6	5	1:1482138..1518990:+	Null
hsa_circ_0001452	0	2	0	0	0	2	1:1482545..1520306:+	Null
hsa_circ_0001453	4	8	2	0	0	5	1:1495485..1529331:+	Null
hsa_circ_0001454	0	0	0	0	4	0	1:149655699..149669310:+	ENSG00000277147
hsa_circ_0001455	0	0	0	2	0	0	1:150492411..150496908:+	ENSG00000143374
hsa_circ_0001456	0	0	0	0	2	0	1:150817920..150826617:-	ENSG00000143437
hsa_circ_0001457	0	3	0	2	3	0	1:151024611..151025673:+	ENSG00000143363
hsa_circ_0001458	0	0	0	2	0	0	1:151024611..151027327:+	ENSG00000143363
hsa_circ_0001459	0	3	0	4	0	0	1:151088190..151118139:+	ENSG00000143458
hsa_circ_0001460	0	0	0	0	3	3	1:151315573..151316509:-	ENSG00000143393
hsa_circ_0001461	0	0	0	4	0	0	1:151423397..151430841:-	ENSG00000143442
hsa_circ_0001462	0	0	0	4	0	2	1:151427823..151442205:-	ENSG00000143442
hsa_circ_0001463	0	0	0	0	0	5	1:153003099..153003405:+	ENSG00000163209
hsa_circ_0001464	0	66	0	0	18	0	1:153439934..153459030:-	Null
hsa_circ_0001465	0	0	0	2	0	0	1:153665220..153668557:-	ENSG00000143621
hsa_circ_0001466	0	2	0	0	0	0	1:153951260..153955166:-	ENSG00000160741
hsa_circ_0001467	0	3	0	0	0	0	1:154225084..154246375:+	ENSG00000143569
hsa_circ_0001468	0	0	2	0	0	0	1:154234591..154235291:+	ENSG00000143569
hsa_circ_0001469	0	0	0	0	2	0	1:154241513..154246375:+	ENSG00000143569
hsa_circ_0001470	0	0	0	0	3	0	1:154251041..154251653:+	ENSG00000143569
hsa_circ_0001471	0	0	0	3	0	0	1:155370504..155370983:-	ENSG00000116539
hsa_circ_0001472	0	0	0	0	0	2	1:155370504..155459898:-	ENSG00000116539
hsa_circ_0001473	0	2	0	0	5	0	1:155395459..155459898:-	ENSG00000116539
hsa_circ_0001474	0	2	0	0	2	0	1:155415744..155459898:-	ENSG00000116539
hsa_circ_0001475	0	4	0	4	13	8	1:155438327..155439068:-	ENSG00000116539
hsa_circ_0001476	0	10	5	2	9	7	1:155438327..155459898:-	ENSG00000116539
hsa_circ_0001477	0	3	0	0	0	0	1:155602073..155726019:+	Null
hsa_circ_0001478	3	0	0	4	5	3	1:155612418..155747896:+	Null
hsa_circ_0001479	0	0	0	0	0	2	1:155649814..155766709:-	Null
hsa_circ_0001480	0	0	0	0	4	0	1:155670320..155679512:-	ENSG00000163374
hsa_circ_0001481	0	3	0	4	8	3	1:155675010..155679512:-	ENSG00000163374
hsa_circ_0001482	0	0	0	2	0	3	1:155675010..155784089:-	Null
hsa_circ_0001483	0	5	0	23	25	22	1:155676548..155679512:-	ENSG00000163374
hsa_circ_0001484	0	3	0	5	3	4	1:155676548..155784089:-	Null
hsa_circ_0001485	0	3	0	0	3	0	1:155725382..155726019:+	ENSG00000132676
hsa_circ_0001486	0	3	0	0	0	0	1:155732501..155732748:+	Null
hsa_circ_0001487	0	0	0	2	0	5	1:155765000..155766709:-	ENSG00000116580
hsa_circ_0001488	0	10	0	5	6	9	1:155853276..155853806:-	ENSG00000116580
hsa_circ_0001489	0	0	0	0	0	2	1:1561332..1564916:-	ENSG00000160075
hsa_circ_0001490	0	6	0	3	0	0	1:156333547..156334918:-	ENSG00000163468
hsa_circ_0001491	0	2	0	0	0	0	1:15638307..15643650:+	ENSG00000197312
hsa_circ_0001492	0	0	0	0	0	2	1:156475108..156477202:-	ENSG00000116604
hsa_circ_0001493	2	2	0	0	5	9	1:15717893..15721388:+	ENSG00000116786
hsa_circ_0001494	0	0	0	0	0	2	1:15719734..15721388:+	ENSG00000116786
hsa_circ_0001495	0	0	0	0	2	0	1:15937163..15938006:+	ENSG00000065526
hsa_circ_0001496	0	3	0	0	0	3	1:159918763..159920537:-	ENSG00000158710
hsa_circ_0001497	0	0	0	3	0	2	1:160323431..160332557:-	ENSG00000122218
hsa_circ_0001498	0	0	0	0	3	0	1:161846449..161863312:+	ENSG00000118217
hsa_circ_0001499	0	3	0	3	0	0	1:16201782..16202574:-	ENSG00000142632
hsa_circ_0001500	5	0	0	0	0	0	1:1637081..1704146:-	Null
hsa_circ_0001501	2	0	0	3	0	0	1:1637408..1704344:-	Null
hsa_circ_0001502	3	6	0	0	4	5	1:16484823..16631109:-	Null
hsa_circ_0001503	0	0	0	2	0	0	1:1648995..1716478:-	Null
hsa_circ_0001504	0	0	0	8	0	0	1:16564807..16567351:-	ENSG00000219481
hsa_circ_0001505	3	7	2	8	15	9	1:1669664..1734835:-	Null
hsa_circ_0001506	0	4	0	0	2	0	1:167966629..167975015:+	ENSG00000143164
hsa_circ_0001507	0	0	0	0	2	0	1:168104477..168104894:-	ENSG00000143147
hsa_circ_0001508	0	2	0	0	0	0	1:168367491..168379782:+	Null
hsa_circ_0001509	0	0	0	0	2	0	1:169954011..169992255:-	ENSG00000075945
hsa_circ_0001510	0	0	0	0	5	5	1:169978085..170031975:-	ENSG00000075945
hsa_circ_0001511	0	0	0	0	0	2	1:171523221..171532961:+	ENSG00000117523
hsa_circ_0001512	0	0	0	0	2	0	1:172140480..172144437:-	ENSG00000230630
hsa_circ_0001513	0	0	0	4	4	0	1:172551512..172557794:+	ENSG00000094975
hsa_circ_0001514	0	0	0	0	0	2	1:172551512..172591071:+	ENSG00000094975
hsa_circ_0001515	0	0	0	0	0	3	1:173755923..173766289:+	ENSG00000076321
hsa_circ_0001516	0	2	0	0	0	2	1:173992755..173993135:-	ENSG00000135870
hsa_circ_0001517	0	0	0	0	2	2	1:17580553..17588479:+	ENSG00000074964
hsa_circ_0001518	0	0	0	2	2	0	1:176081152..176136547:-	ENSG00000143207
hsa_circ_0001519	0	0	0	0	2	0	1:176149006..176184692:-	ENSG00000143207
hsa_circ_0001520	0	4	0	0	3	0	1:176555407..176557241:+	ENSG00000116183
hsa_circ_0001521	0	0	0	0	4	0	1:179043715..179054638:+	ENSG00000116199
hsa_circ_0001522	0	0	0	0	5	0	1:179131311..179133374:-	ENSG00000143322
hsa_circ_0001523	0	2	0	0	0	0	1:179662104..179669404:+	ENSG00000162782
hsa_circ_0001524	0	0	0	0	2	0	1:179986169..180006567:+	ENSG00000135837
hsa_circ_0001525	0	0	0	4	4	0	1:180003174..180006567:+	ENSG00000135837
hsa_circ_0001526	0	0	0	0	3	0	1:180003174..180024582:+	ENSG00000135837
hsa_circ_0001527	0	6	0	0	0	0	1:180397516..180413471:-	ENSG00000230124
hsa_circ_0001528	0	2	0	0	0	0	1:1804419..1825499:-	ENSG00000078369
hsa_circ_0001529	0	14	3	7	7	0	1:180984677..180993425:-	ENSG00000135823
hsa_circ_0001530	0	5	0	6	0	0	1:180984677..181005463:-	ENSG00000135823
hsa_circ_0001531	0	5	0	0	0	0	1:1815756..1839238:-	ENSG00000078369
hsa_circ_0001532	0	0	0	2	0	0	1:184706643..184711877:-	ENSG00000116406
hsa_circ_0001533	0	0	0	4	3	3	1:185214507..185231708:+	ENSG00000116668
hsa_circ_0001534	0	0	0	0	2	0	1:185846026..185865863:+	ENSG00000143341
hsa_circ_0001535	0	0	0	4	0	0	1:186406083..186419077:+	ENSG00000157181
hsa_circ_0001536	0	2	0	3	0	0	1:186893011..186911389:+	ENSG00000116711
hsa_circ_0001537	0	0	0	0	0	3	1:18918362..18919773:-	ENSG00000255275,ENSG00000169991
hsa_circ_0001538	0	0	0	0	2	0	1:193075820..193077050:+	ENSG00000116747
hsa_circ_0001539	0	0	0	0	2	0	1:193141850..193152444:+	ENSG00000134371
hsa_circ_0001540	0	4	0	0	0	0	1:194159280..194167715:-	Null
hsa_circ_0001541	0	2	0	0	0	0	1:197172160..197191899:-	ENSG00000177888
hsa_circ_0001542	0	0	0	2	0	0	1:197583152..197611976:-	ENSG00000213047
hsa_circ_0001543	0	3	0	0	0	0	1:197583152..197658369:-	ENSG00000213047
hsa_circ_0001544	0	0	0	0	3	2	1:197617659..197658369:-	ENSG00000213047
hsa_circ_0001545	0	0	0	2	0	0	1:200760839..200815644:+	ENSG00000118200
hsa_circ_0001546	0	0	0	0	2	0	1:200832200..200847292:+	ENSG00000118200
hsa_circ_0001547	0	0	0	2	0	0	1:200847640..200853495:+	ENSG00000118200
hsa_circ_0001548	0	0	0	0	2	0	1:201847279..201848594:+	ENSG00000198700
hsa_circ_0001549	0	2	0	0	0	0	1:202001376..202003461:+	ENSG00000176393
hsa_circ_0001550	0	0	0	0	0	2	1:202581928..202582101:+	ENSG00000077157
hsa_circ_0001551	0	0	0	3	9	5	1:203707009..203708104:+	ENSG00000058668
hsa_circ_0001552	0	0	0	0	2	0	1:203770828..203772147:+	ENSG00000122188
hsa_circ_0001553	0	0	0	0	0	2	1:204116507..204117707:+	ENSG00000143842
hsa_circ_0001554	0	0	0	0	0	3	1:204952011..204991306:+	ENSG00000163531
hsa_circ_0001555	0	0	0	0	4	0	1:205001170..205002748:+	ENSG00000163531
hsa_circ_0001556	0	22	0	10	19	8	1:205616478..205623891:-	ENSG00000158711
hsa_circ_0001557	0	2	0	0	0	0	1:206713391..206713563:+	Null
hsa_circ_0001558	2	0	0	3	0	0	1:207027494..207027679:-	ENSG00000182795
hsa_circ_0001559	0	2	0	0	8	2	1:20749723..20773610:-	ENSG00000127483
hsa_circ_0001560	3	0	0	0	2	3	1:20757166..20773610:-	ENSG00000127483
hsa_circ_0001561	0	0	2	0	0	0	1:207580240..207694751:+	Null
hsa_circ_0001562	0	0	0	0	6	0	1:207652547..207752309:+	Null
hsa_circ_0001563	0	0	0	2	2	9	1:20770930..20773610:-	ENSG00000127483
hsa_circ_0001564	0	0	0	2	0	0	1:208210280..208218002:-	ENSG00000076356
hsa_circ_0001565	0	0	0	0	3	0	1:20941491..20950111:-	ENSG00000075151
hsa_circ_0001566	0	0	0	5	13	0	1:20969474..20981227:-	ENSG00000075151
hsa_circ_0001567	0	2	0	0	8	0	1:20969474..21002808:-	ENSG00000075151
hsa_circ_0001568	0	2	0	0	0	0	1:21050866..21111383:-	ENSG00000075151
hsa_circ_0001569	0	0	0	0	4	0	1:21089138..21111383:-	ENSG00000075151
hsa_circ_0001570	0	0	0	3	30	2	1:211353239..211354467:+	ENSG00000082512
hsa_circ_0001571	0	5	0	0	0	0	1:211778918..211793190:-	ENSG00000123684
hsa_circ_0001572	0	0	0	0	2	0	1:212329135..212333598:+	ENSG00000066027
hsa_circ_0001573	0	0	0	0	2	0	1:21272699..21290156:-	ENSG00000117298
hsa_circ_0001574	0	3	0	3	2	0	1:213117317..213129889:+	ENSG00000136643
hsa_circ_0001575	0	0	2	0	3	0	1:213167858..213176492:+	ENSG00000136643
hsa_circ_0001576	0	0	0	0	0	2	1:215575901..215579137:+	ENSG00000136636
hsa_circ_0001577	0	0	0	0	3	0	1:21715389..21721764:-	ENSG00000090686
hsa_circ_0001578	0	0	2	0	6	0	1:21715389..21724095:-	ENSG00000090686
hsa_circ_0001579	0	2	0	0	0	0	1:217610321..217614202:-	ENSG00000092978
hsa_circ_0001580	0	3	0	0	0	2	1:219193082..219218712:+	Null
hsa_circ_0001581	0	6	0	0	3	0	1:219193082..219241308:+	Null
hsa_circ_0001582	0	0	0	4	0	0	1:219193082..219391114:+	Null
hsa_circ_0001583	0	0	0	0	2	0	1:220006106..220007338:-	ENSG00000136628
hsa_circ_0001584	0	19	0	0	0	0	1:220202276..220232863:-	ENSG00000118873
hsa_circ_0001585	0	0	0	0	3	0	1:22078429..22086866:+	ENSG00000070831
hsa_circ_0001586	0	0	0	2	0	0	1:222724092..222725555:+	ENSG00000162819
hsa_circ_0001587	0	0	0	0	3	0	1:222899781..222943332:+	ENSG00000154309,ENSG00000278610,Null
hsa_circ_0001588	0	0	0	3	0	0	1:223132475..223134864:-	ENSG00000187554
hsa_circ_0001589	0	0	0	0	3	0	1:224365879..224371423:+	ENSG00000143771
hsa_circ_0001590	0	0	0	2	3	2	1:22489880..22491533:+	ENSG00000184677
hsa_circ_0001591	0	4	0	0	2	3	1:224952670..224974153:+	ENSG00000185842
hsa_circ_0001592	0	7	0	0	0	0	1:224952670..225007544:+	ENSG00000185842
hsa_circ_0001593	0	2	0	0	0	0	1:224952670..225023865:+	ENSG00000185842
hsa_circ_0001594	0	2	0	0	0	0	1:225152005..225185425:+	ENSG00000185842
hsa_circ_0001595	0	2	0	0	0	0	1:225185291..225207220:+	ENSG00000185842
hsa_circ_0001596	0	0	0	0	3	2	1:225412454..225415332:-	ENSG00000143815
hsa_circ_0001597	0	0	0	3	0	0	1:228299882..228303938:+	ENSG00000154358
hsa_circ_0001598	0	0	0	0	3	0	1:228394737..228395252:-	ENSG00000154370
hsa_circ_0001599	0	2	2	3	7	4	1:23030469..23050520:+	ENSG00000004487
hsa_circ_0001600	0	3	0	2	3	0	1:23030469..23059167:+	ENSG00000004487
hsa_circ_0001601	0	0	0	0	4	0	1:230663141..230671640:+	ENSG00000135775
hsa_circ_0001602	0	0	0	0	2	0	1:230663141..230675124:+	ENSG00000135775
hsa_circ_0001603	0	0	0	0	3	0	1:231370562..231374099:-	ENSG00000135766
hsa_circ_0001604	0	0	0	0	5	0	1:231537213..231542611:+	ENSG00000116918,ENSG00000270106
hsa_circ_0001605	0	0	0	3	8	4	1:231795242..231818517:+	ENSG00000162946
hsa_circ_0001606	0	0	0	4	2	0	1:232460887..232471528:-	ENSG00000116991
hsa_circ_0001607	0	5	0	0	0	0	1:232513857..232515608:-	ENSG00000116991
hsa_circ_0001608	0	0	0	0	2	0	1:232513857..232533583:-	ENSG00000116991,Null
hsa_circ_0001609	0	0	0	2	0	0	1:233090061..233095863:-	ENSG00000135749
hsa_circ_0001610	0	0	0	0	2	0	1:235437322..235442911:+	ENSG00000116957
hsa_circ_0001611	0	0	0	2	0	0	1:235455559..235484515:-	ENSG00000162885
hsa_circ_0001612	0	0	0	0	2	0	1:235830226..235833667:-	ENSG00000143669
hsa_circ_0001613	0	0	0	0	7	0	1:236011921..236048989:-	ENSG00000116962
hsa_circ_0001614	0	0	0	0	2	0	1:236032401..236038253:-	ENSG00000116962
hsa_circ_0001615	0	0	0	2	0	0	1:236806144..236816543:+	ENSG00000116984
hsa_circ_0001616	0	0	0	0	2	0	1:236824119..236863554:+	ENSG00000116984
hsa_circ_0001617	0	0	0	4	0	0	1:237369534..237423248:+	ENSG00000198626
hsa_circ_0001618	0	0	0	0	3	4	1:237369534..237456735:+	ENSG00000198626
hsa_circ_0001619	0	0	0	0	4	0	1:237374717..237377435:+	ENSG00000198626
hsa_circ_0001620	0	0	0	2	0	0	1:237374717..237456735:+	ENSG00000198626
hsa_circ_0001621	0	0	0	2	0	0	1:237423092..237456735:+	ENSG00000198626
hsa_circ_0001622	0	0	0	0	2	2	1:237566567..237569319:+	ENSG00000198626
hsa_circ_0001623	0	0	0	0	3	0	1:237791516..237792104:+	Null
hsa_circ_0001624	0	0	0	2	0	0	1:243293091..243330692:+	ENSG00000054282
hsa_circ_0001625	0	4	0	0	0	0	1:243304713..243316893:+	ENSG00000054282
hsa_circ_0001626	0	0	0	0	2	0	1:243304713..243330692:+	ENSG00000054282
hsa_circ_0001627	0	2	0	0	0	0	1:243304713..243344331:+	ENSG00000054282
hsa_circ_0001628	0	0	0	0	2	0	1:243304713..243426558:+	ENSG00000054282
hsa_circ_0001629	0	0	0	0	4	0	1:243341039..243426558:+	ENSG00000054282
hsa_circ_0001630	0	2	0	0	0	0	1:243378721..243418076:+	ENSG00000054282
hsa_circ_0001631	0	0	0	3	0	0	1:243415702..243426558:+	ENSG00000054282
hsa_circ_0001632	0	0	0	0	3	0	1:243545510..243695716:-	ENSG00000117020
hsa_circ_0001633	0	0	0	5	0	0	1:244408712..244417752:-	ENSG00000035687
hsa_circ_0001634	0	0	0	0	0	3	1:244552322..244561145:+	ENSG00000179397
hsa_circ_0001635	0	5	0	0	0	0	1:245002121..245017326:+	ENSG00000203666
hsa_circ_0001636	0	0	0	0	6	3	1:24514314..24514567:+	ENSG00000117602
hsa_circ_0001637	0	2	0	0	0	0	1:246437148..246440124:-	Null
hsa_circ_0001638	0	2	0	0	0	0	1:247138716..247159813:-	ENSG00000196418
hsa_circ_0001639	5	15	2	13	36	15	1:247155566..247159813:-	Null,ENSG00000196418
hsa_circ_0001640	3	27	0	12	8	0	1:247156406..247159813:-	ENSG00000196418
hsa_circ_0001641	0	0	0	0	2	0	1:247157000..247159813:-	ENSG00000196418
hsa_circ_0001642	2	2	0	0	2	4	1:26446316..26447660:+	ENSG00000117682
hsa_circ_0001643	0	0	0	0	2	0	1:26453609..26463433:-	Null
hsa_circ_0001644	0	10	0	8	12	13	1:26729651..26732792:+	ENSG00000117713
hsa_circ_0001645	0	0	0	0	2	2	1:26941457..26941818:+	ENSG00000090273
hsa_circ_0001646	7	0	0	8	13	6	1:26942660..26943065:+	ENSG00000090273
hsa_circ_0001647	0	0	3	0	0	0	1:27668226..27669346:-	ENSG00000126709
hsa_circ_0001648	0	0	0	2	0	0	1:27789562..27793632:+	ENSG00000117758
hsa_circ_0001649	0	0	0	8	5	7	1:28459085..28466535:+	ENSG00000204138
hsa_circ_0001650	0	0	2	2	0	0	1:28473554..28474151:+	ENSG00000204138
hsa_circ_0001651	0	0	0	2	0	0	1:28473554..28476291:+	ENSG00000204138
hsa_circ_0001652	0	0	0	0	2	0	1:28473554..28480604:+	ENSG00000204138
hsa_circ_0001653	0	0	0	2	2	0	1:28742403..28743986:+	ENSG00000198492
hsa_circ_0001654	0	0	0	0	2	0	1:29148080..29154910:-	ENSG00000116350
hsa_circ_0001655	0	3	0	5	0	2	1:29154696..29154910:-	ENSG00000116350
hsa_circ_0001656	0	0	0	0	2	0	1:29216005..29220921:-	ENSG00000116353
hsa_circ_0001657	0	0	0	0	5	0	1:30992390..30995220:-	ENSG00000134644
hsa_circ_0001658	0	0	0	0	2	0	1:30992390..31007102:-	ENSG00000134644
hsa_circ_0001659	0	0	0	0	0	2	1:31583461..31585485:+	ENSG00000142910
hsa_circ_0001660	0	6	0	12	13	11	1:31915895..31919658:-	ENSG00000184007
hsa_circ_0001661	0	0	0	0	2	0	1:32030298..32033334:+	ENSG00000121774
hsa_circ_0001662	0	0	0	0	0	4	1:32030298..32038619:+	ENSG00000121774
hsa_circ_0001663	0	0	0	0	2	0	1:32226171..32226530:+	ENSG00000084623
hsa_circ_0001664	0	0	0	0	3	0	1:32326939..32327677:+	ENSG00000116478
hsa_circ_0001665	0	0	0	2	0	0	1:32631827..32634792:-	ENSG00000176261
hsa_circ_0001666	0	0	0	2	0	0	1:32684010..32684382:-	ENSG00000162520
hsa_circ_0001667	0	0	0	3	8	2	1:32948222..32949774:-	ENSG00000116514
hsa_circ_0001668	0	0	0	0	3	0	1:33280124..33280457:+	ENSG00000160094
hsa_circ_0001669	0	0	0	6	4	4	1:33294937..33295305:+	ENSG00000160094
hsa_circ_0001670	0	2	0	7	5	4	1:35358925..35361789:+	ENSG00000146463
hsa_circ_0001671	0	2	0	2	4	0	1:35381259..35389082:+	ENSG00000146463
hsa_circ_0001672	0	0	0	0	0	2	1:35381259..35390098:+	ENSG00000146463
hsa_circ_0001673	0	0	0	2	0	0	1:35441047..35444303:-	ENSG00000142687
hsa_circ_0001674	0	0	0	0	2	0	1:35470863..35479212:-	ENSG00000142687
hsa_circ_0001675	0	0	0	0	4	0	1:35474805..35479212:-	ENSG00000142687
hsa_circ_0001676	0	0	0	2	2	0	1:36361221..36362656:-	ENSG00000196182
hsa_circ_0001677	0	0	0	0	2	0	1:3867974..3872572:+	ENSG00000169598
hsa_circ_0001678	0	0	0	3	0	0	1:39254298..39303078:+	ENSG00000127603
hsa_circ_0001679	0	0	0	2	0	2	1:40064227..40064559:+	ENSG00000131236
hsa_circ_0001680	0	0	0	3	3	5	1:40189055..40202614:+	ENSG00000117000
hsa_circ_0001681	0	0	0	0	2	0	1:40190772..40202614:+	ENSG00000117000
hsa_circ_0001682	0	0	0	0	4	0	1:41046407..41075451:-	ENSG00000010803
hsa_circ_0001683	0	4	2	24	23	12	1:41070595..41075451:-	ENSG00000010803
hsa_circ_0001684	0	0	0	0	2	0	1:41113283..41143112:-	ENSG00000010803
hsa_circ_0001685	0	2	0	0	2	0	1:41575544..41585318:-	ENSG00000127124
hsa_circ_0001686	0	0	0	0	2	0	1:42265115..42278672:-	ENSG00000198815
hsa_circ_0001687	0	0	0	0	2	0	1:42265115..42311110:-	ENSG00000198815
hsa_circ_0001688	0	0	0	0	2	0	1:43588731..43589000:+	ENSG00000142949
hsa_circ_0001689	0	0	0	0	2	0	1:44284835..44339322:-	ENSG00000117419
hsa_circ_0001690	0	0	0	0	5	0	1:45640210..45642499:-	ENSG00000159592
hsa_circ_0001691	0	3	0	0	6	2	1:45659028..45661225:-	ENSG00000159592
hsa_circ_0001692	0	0	0	0	0	2	1:45660184..45661225:-	ENSG00000159592
hsa_circ_0001693	0	3	0	0	2	0	1:46055795..46080750:-	ENSG00000117461,ENSG00000278139
hsa_circ_0001694	0	0	0	0	0	3	1:47280241..47282459:-	ENSG00000123473
hsa_circ_0001695	0	0	0	2	6	3	1:48355670..48359770:-	ENSG00000132122
hsa_circ_0001696	0	0	0	0	3	0	1:48355670..48403882:-	ENSG00000132122
hsa_circ_0001697	0	0	0	0	2	0	1:50567077..50596216:-	ENSG00000185104
hsa_circ_0001698	0	2	0	0	0	0	1:50655442..50744775:-	ENSG00000185104
hsa_circ_0001699	0	0	0	0	2	0	1:50788000..50857997:-	ENSG00000185104
hsa_circ_0001700	0	0	0	0	2	0	1:51394381..51448135:-	ENSG00000085832
hsa_circ_0001701	0	2	0	4	4	0	1:51402435..51408332:-	ENSG00000085832
hsa_circ_0001702	0	0	0	0	2	0	1:51440347..51448135:-	ENSG00000085832
hsa_circ_0001703	0	0	0	2	0	0	1:51461091..51465326:-	ENSG00000085832
hsa_circ_0001704	0	0	0	2	0	0	1:51827796..51834170:-	ENSG00000078618
hsa_circ_0001705	0	0	0	0	0	3	1:52436755..52461769:-	ENSG00000134744
hsa_circ_0001706	0	0	0	4	5	5	1:52493611..52509712:-	ENSG00000134744
hsa_circ_0001707	0	2	0	2	2	0	1:52515891..52526373:-	ENSG00000134744
hsa_circ_0001708	0	0	0	2	0	0	1:54040756..54047372:-	ENSG00000116209
hsa_circ_0001709	0	0	0	0	2	0	1:54651949..54673186:+	ENSG00000184313,ENSG00000271723
hsa_circ_0001710	0	0	0	0	4	0	1:58458858..58539306:-	Null
hsa_circ_0001711	0	0	0	3	7	0	1:58506060..58536741:-	ENSG00000162600
hsa_circ_0001712	0	2	0	0	5	2	1:59321536..59346398:+	ENSG00000172456
hsa_circ_0001713	0	0	0	2	5	4	1:59321536..59378837:+	ENSG00000172456
hsa_circ_0001714	0	3	0	0	0	0	1:59339958..59346398:+	ENSG00000172456
hsa_circ_0001715	0	0	0	6	4	6	1:59339958..59378837:+	ENSG00000172456
hsa_circ_0001716	0	0	0	4	0	0	1:61827422..61901459:+	ENSG00000132849
hsa_circ_0001717	0	0	0	2	0	0	1:62444738..62447511:+	ENSG00000162607
hsa_circ_0001718	0	0	0	0	3	0	1:62803719..62821209:+	ENSG00000125703
hsa_circ_0001719	0	0	0	0	3	0	1:64629355..64641969:+	ENSG00000158966
hsa_circ_0001720	0	3	0	3	5	6	1:66891154..66905375:-	ENSG00000152763
hsa_circ_0001721	0	0	0	4	2	2	1:66958059..66963160:+	ENSG00000198160
hsa_circ_0001722	0	3	0	2	5	0	1:70292388..70315566:-	ENSG00000118454
hsa_circ_0001723	0	0	0	3	0	0	1:74236102..74271708:+	ENSG00000259030,ENSG00000116783
hsa_circ_0001724	0	0	0	0	0	2	1:75739980..75750546:+	ENSG00000117054
hsa_circ_0001725	0	0	0	0	3	3	1:75745806..75750546:+	ENSG00000117054
hsa_circ_0001726	0	0	0	0	3	0	1:77154449..77169395:-	ENSG00000142892
hsa_circ_0001727	0	0	0	0	0	2	1:77631850..77641655:-	ENSG00000036549
hsa_circ_0001728	0	0	0	4	0	0	1:77711747..77715868:-	ENSG00000077254
hsa_circ_0001729	0	0	4	5	8	9	1:7777160..7778169:+	ENSG00000049245
hsa_circ_0001730	0	0	0	8	10	5	1:805799..810170:-	ENSG00000230092
hsa_circ_0001731	0	0	0	0	4	2	1:83911165..83947282:-	ENSG00000137941
hsa_circ_0001732	0	17	0	5	6	0	1:84865385..84866138:-	ENSG00000171517
hsa_circ_0001733	0	0	0	3	2	3	1:8495063..8557523:-	ENSG00000142599
hsa_circ_0001734	0	0	0	3	0	6	1:8495063..8614686:-	ENSG00000142599
hsa_circ_0001735	0	0	0	2	0	0	1:8508627..8557523:-	ENSG00000142599
hsa_circ_0001736	0	3	0	6	11	5	1:8541214..8557523:-	ENSG00000142599
hsa_circ_0001737	0	0	0	2	5	10	1:8541214..8614686:-	ENSG00000142599
hsa_circ_0001738	0	0	0	0	3	0	1:86124845..86146183:-	ENSG00000171502
hsa_circ_0001739	0	0	0	0	2	0	1:8614561..8656441:-	ENSG00000142599
hsa_circ_0001740	0	0	0	0	4	0	1:8655973..8656441:-	ENSG00000142599
hsa_circ_0001741	0	0	0	0	4	0	1:86715724..86719635:+	ENSG00000097033
hsa_circ_0001742	0	0	0	2	2	0	1:86715724..86724405:+	ENSG00000097033
hsa_circ_0001743	0	0	0	0	0	2	1:8743203..8743493:-	Null
hsa_circ_0001744	0	0	0	0	3	0	1:88740988..88771879:+	ENSG00000065243
hsa_circ_0001745	0	0	0	0	2	0	1:88740988..88786213:+	ENSG00000065243
hsa_circ_0001746	0	0	0	0	2	0	1:88770352..88786213:+	ENSG00000065243
hsa_circ_0001747	0	0	0	2	0	0	1:89385744..89387719:+	Null
hsa_circ_0001748	0	0	0	0	4	3	1:90916640..90941309:-	ENSG00000122482
hsa_circ_0001749	0	0	0	2	0	0	1:90937485..90982370:-	ENSG00000122482
hsa_circ_0001750	2	0	0	6	5	3	1:91861471..91861644:-	ENSG00000069702
hsa_circ_0001751	0	0	0	0	0	4	1:91861471..91864279:-	Null,ENSG00000069702
hsa_circ_0001752	0	0	0	0	2	0	1:92320599..92345914:+	ENSG00000122484
hsa_circ_0001753	0	3	0	0	0	0	1:92333391..92345914:+	ENSG00000122484
hsa_circ_0001754	0	2	0	2	5	3	1:92333391..92380873:+	ENSG00000122484
hsa_circ_0001755	0	0	0	2	0	0	1:92563642..92704744:-	ENSG00000067208
hsa_circ_0001756	0	0	0	0	3	0	1:92605307..92704744:-	ENSG00000067208
hsa_circ_0001757	0	0	0	0	2	0	1:93567279..93567851:-	ENSG00000137936
hsa_circ_0001758	0	0	0	2	0	0	1:93876268..93877862:-	ENSG00000067334
hsa_circ_0001759	0	0	0	0	2	0	1:94458607..94480606:+	ENSG00000117528
hsa_circ_0001760	0	0	0	3	0	3	1:95143891..95151419:+	ENSG00000152078,ENSG00000271092
hsa_circ_0001761	0	0	0	0	7	0	1:95143891..95173889:+	ENSG00000152078,ENSG00000271092
hsa_circ_0001762	0	0	0	0	0	2	1:96769703..96785254:+	ENSG00000117569
hsa_circ_0001763	0	3	0	0	8	6	1:9931891..9934860:-	ENSG00000162441
hsa_circ_0001764	0	0	0	0	2	0	1:9931891..9935627:-	ENSG00000162441
hsa_circ_0001765	0	0	0	0	2	0	20:10556231..10560820:+	ENSG00000149346
hsa_circ_0001766	0	29	0	0	0	0	20:10646939..10686600:-	Null
hsa_circ_0001767	0	21	0	0	0	0	20:10646939..10689198:-	Null
hsa_circ_0001768	0	2	0	0	0	0	20:13528433..13569586:-	ENSG00000089123
hsa_circ_0001769	0	2	0	0	0	0	20:13559008..13580981:-	ENSG00000089123
hsa_circ_0001770	0	0	0	0	2	0	20:13559008..13587370:-	ENSG00000089123
hsa_circ_0001771	0	2	0	0	5	0	20:16370586..16381747:-	ENSG00000089177
hsa_circ_0001772	0	0	0	0	3	0	20:16378805..16381747:-	ENSG00000089177
hsa_circ_0001773	0	0	0	0	3	0	20:16494291..16515664:-	ENSG00000089177
hsa_circ_0001774	0	0	0	2	0	0	20:17952587..17954117:-	ENSG00000089006
hsa_circ_0001775	0	3	0	0	0	0	20:18297985..18306393:+	ENSG00000125846
hsa_circ_0001776	0	4	0	0	0	0	20:19964952..19996842:+	ENSG00000132669
hsa_circ_0001777	0	0	0	0	0	2	20:19990006..19996842:+	ENSG00000132669
hsa_circ_0001778	0	4	0	0	0	0	20:21326279..21368590:+	ENSG00000088930
hsa_circ_0001779	0	0	0	0	2	0	20:21339044..21344208:+	ENSG00000088930
hsa_circ_0001780	0	0	0	3	5	0	20:21365421..21368590:+	ENSG00000088930
hsa_circ_0001781	0	2	0	0	3	0	20:23389946..23403072:-	ENSG00000125814
hsa_circ_0001782	0	0	0	0	2	4	20:25632158..25645648:+	ENSG00000213742
hsa_circ_0001783	0	4	0	0	2	2	20:2947982..2965202:+	ENSG00000132670
hsa_circ_0001784	0	4	0	15	11	7	20:2964272..2965202:+	ENSG00000132670
hsa_circ_0001785	0	0	2	0	0	0	20:31527484..31528050:+	ENSG00000101294
hsa_circ_0001786	0	10	0	3	6	6	20:32366384..32369123:+	ENSG00000171456
hsa_circ_0001787	0	2	0	4	7	0	20:32366384..32371874:+	ENSG00000171456
hsa_circ_0001788	0	5	0	8	26	8	20:33619517..33623296:+	ENSG00000078699
hsa_circ_0001789	0	0	0	0	0	2	20:33619517..33628435:+	ENSG00000078699
hsa_circ_0001790	0	2	0	2	3	0	20:34029769..34031604:+	Null,ENSG00000125970
hsa_circ_0001791	0	0	0	2	0	2	20:34072066..34078553:+	ENSG00000125970
hsa_circ_0001792	0	2	0	0	0	2	20:34470048..34481206:+	ENSG00000078747
hsa_circ_0001793	0	4	0	0	2	0	20:34470048..34492597:+	ENSG00000078747
hsa_circ_0001794	0	4	0	0	2	0	20:34477772..34479789:+	ENSG00000078747
hsa_circ_0001795	0	2	0	0	0	0	20:34714590..34715365:-	Null
hsa_circ_0001796	0	2	0	0	0	0	20:34746807..34768586:-	ENSG00000198646
hsa_circ_0001797	0	21	0	0	10	0	20:35170926..35176446:+	Null
hsa_circ_0001798	0	2	0	0	0	0	20:35170930..35176446:+	Null
hsa_circ_0001799	0	4	0	0	0	0	20:35172089..35176446:+	ENSG00000101000
hsa_circ_0001800	0	0	0	0	0	3	20:35216748..35218061:-	ENSG00000126005
hsa_circ_0001801	0	2	0	0	0	0	20:35366557..35384133:-	ENSG00000101019
hsa_circ_0001802	0	6	0	2	3	0	20:35653528..35659014:-	ENSG00000244462
hsa_circ_0001803	0	0	0	0	0	3	20:35713019..35725155:-	ENSG00000131051
hsa_circ_0001804	0	5	0	8	12	9	20:35714185..35725155:-	ENSG00000131051
hsa_circ_0001805	0	0	0	0	2	0	20:35714185..35732135:-	ENSG00000131051
hsa_circ_0001806	0	0	0	3	3	0	20:35716740..35725155:-	ENSG00000131051
hsa_circ_0001807	0	0	0	4	3	3	20:35721740..35725155:-	ENSG00000131051
hsa_circ_0001808	0	0	0	2	0	0	20:35724570..35725155:-	ENSG00000131051
hsa_circ_0001809	0	4	0	0	2	0	20:35729312..35732135:-	ENSG00000131051
hsa_circ_0001810	0	0	0	0	0	3	20:35731941..35739017:-	ENSG00000131051
hsa_circ_0001811	0	0	0	2	0	0	20:35842573..35858381:+	ENSG00000025293
hsa_circ_0001812	0	2	0	0	5	4	20:35858302..35871829:+	ENSG00000025293
hsa_circ_0001813	0	0	0	0	2	0	20:35863013..35871829:+	ENSG00000025293
hsa_circ_0001814	0	2	0	0	0	0	20:36607715..36609730:+	ENSG00000259399,ENSG00000101084
hsa_circ_0001815	0	3	0	0	0	0	20:36687492..36688784:-	ENSG00000101079
hsa_circ_0001816	0	3	0	0	0	0	20:36793249..36839441:-	ENSG00000149639
hsa_circ_0001817	5	0	0	2	0	0	20:36829054..36839441:-	ENSG00000149639
hsa_circ_0001818	0	0	0	0	2	0	20:37047053..37068186:-	ENSG00000080839
hsa_circ_0001819	0	0	0	0	2	0	20:37065424..37068186:-	ENSG00000080839
hsa_circ_0001820	0	0	0	5	0	3	20:38057532..38066256:+	ENSG00000101413
hsa_circ_0001821	0	0	0	2	5	0	20:38983699..38994880:+	ENSG00000101452
hsa_circ_0001822	0	2	0	0	0	0	20:3945177..3974400:-	ENSG00000101236
hsa_circ_0001823	0	2	0	6	6	2	20:41092472..41101353:+	ENSG00000198900
hsa_circ_0001824	0	0	0	0	2	0	20:41267463..41269083:-	ENSG00000174306
hsa_circ_0001825	0	3	0	2	0	3	20:41512846..41551360:-	ENSG00000124177
hsa_circ_0001826	0	3	0	3	3	2	20:41533050..41551360:-	ENSG00000124177
hsa_circ_0001827	0	0	0	2	0	0	20:44159618..44162707:-	ENSG00000149596
hsa_circ_0001828	0	0	0	0	2	0	20:44503815..44514040:-	ENSG00000132824
hsa_circ_0001829	0	0	0	0	0	3	20:45743744..45745339:+	Null
hsa_circ_0001830	0	10	0	0	4	0	20:47623911..47633636:+	ENSG00000124151
hsa_circ_0001831	0	2	0	0	0	0	20:4863754..4863916:-	Null
hsa_circ_0001832	0	0	0	0	0	3	20:48953556..48963898:+	ENSG00000124198
hsa_circ_0001833	0	0	0	0	2	0	20:49066192..49070297:+	ENSG00000124207
hsa_circ_0001834	0	0	0	2	0	0	20:49135833..49166285:-	ENSG00000124214
hsa_circ_0001835	0	3	0	0	0	0	20:49269942..49271750:-	ENSG00000124201
hsa_circ_0001836	0	0	0	0	0	6	20:49372341..49374992:-	ENSG00000158445
hsa_circ_0001837	0	0	0	0	2	0	20:49849579..49855581:+	ENSG00000197818
hsa_circ_0001838	0	0	0	0	3	0	20:49864728..49884066:+	ENSG00000197818
hsa_circ_0001839	0	0	0	0	3	0	20:51516784..51523596:-	ENSG00000101096
hsa_circ_0001840	0	2	0	0	0	0	20:5176648..5178956:+	ENSG00000101290
hsa_circ_0001841	0	15	0	0	7	0	20:54157169..54171670:-	ENSG00000019186
hsa_circ_0001842	0	0	0	7	5	2	20:58438945..58441083:+	ENSG00000124164
hsa_circ_0001843	0	0	0	0	4	0	20:58999343..58999809:-	Null
hsa_circ_0001844	0	5	0	6	4	4	20:62139075..62140944:-	ENSG00000101182
hsa_circ_0001845	0	0	0	0	0	2	20:62286583..62289330:+	ENSG00000130703
hsa_circ_0001846	0	0	0	0	2	0	20:62325316..62331129:-	ENSG00000130702
hsa_circ_0001847	0	3	0	0	0	0	20:62660412..62661175:+	ENSG00000101187
hsa_circ_0001848	0	2	0	0	0	0	20:62857395..62859526:-	ENSG00000101190
hsa_circ_0001849	0	4	0	0	2	0	20:63202287..63203807:-	ENSG00000149658
hsa_circ_0001850	0	2	5	3	3	4	20:63775678..63790790:-	ENSG00000130584
hsa_circ_0001851	0	2	0	0	0	0	20:63909411..63910767:+	Null
hsa_circ_0001852	0	0	0	0	3	0	20:63928335..63931022:+	ENSG00000101152
hsa_circ_0001853	0	0	0	3	0	0	20:7996026..8010315:-	ENSG00000125827
hsa_circ_0001854	0	0	0	2	0	0	20:8740344..8741573:+	ENSG00000182621
hsa_circ_0001855	0	2	0	0	0	0	21:10454134..10464976:+	ENSG00000187172
hsa_circ_0001856	0	14	0	0	2	0	21:10454134..10473729:+	ENSG00000187172
hsa_circ_0001857	0	10	0	0	0	0	21:10454134..10501019:+	ENSG00000187172
hsa_circ_0001858	0	3	0	0	0	0	21:10454134..10516431:+	ENSG00000187172
hsa_circ_0001859	0	4	0	0	0	0	21:10454222..10473729:+	ENSG00000187172
hsa_circ_0001860	0	0	0	3	0	2	21:13864384..13864595:-	Null
hsa_circ_0001861	0	0	0	3	0	0	21:13864390..13864601:-	Null
hsa_circ_0001862	0	0	0	2	0	2	21:13883891..13884111:-	Null
hsa_circ_0001863	0	0	0	0	0	2	21:13883897..13884117:-	Null
hsa_circ_0001864	0	0	0	0	2	0	21:14991201..15043574:-	ENSG00000180530
hsa_circ_0001865	0	4	0	3	4	6	21:15014344..15043574:-	ENSG00000180530
hsa_circ_0001866	0	3	0	5	7	2	21:15762891..15766141:+	ENSG00000155313
hsa_circ_0001867	0	0	0	0	2	0	21:15777904..15805258:+	ENSG00000155313
hsa_circ_0001868	0	0	0	2	0	2	21:15833348..15842540:+	ENSG00000155313
hsa_circ_0001869	0	0	0	0	5	0	21:17236823..17260058:-	Null
hsa_circ_0001870	0	0	0	0	2	0	21:17246862..17270359:-	Null
hsa_circ_0001871	0	0	0	0	3	0	21:26051000..26053348:-	ENSG00000142192
hsa_circ_0001872	0	0	0	0	2	0	21:28377946..28431259:-	Null
hsa_circ_0001873	0	0	0	0	4	0	21:28398093..28417158:-	Null
hsa_circ_0001874	0	0	0	3	0	0	21:28417075..28446472:-	Null
hsa_circ_0001875	0	0	0	4	3	2	21:28444148..28446472:-	ENSG00000232855
hsa_circ_0001876	0	4	2	11	11	5	21:29321221..29329693:+	ENSG00000156273
hsa_circ_0001877	0	0	0	0	3	0	21:29326059..29329693:+	ENSG00000156273
hsa_circ_0001878	0	0	0	2	0	0	21:31164962..31203012:-	ENSG00000156299
hsa_circ_0001879	0	0	0	4	0	0	21:33432177..33432871:+	ENSG00000159128
hsa_circ_0001880	0	0	0	0	2	0	21:34834410..34859578:-	ENSG00000159216
hsa_circ_0001881	0	4	0	0	4	2	21:36247517..36248568:+	ENSG00000142197
hsa_circ_0001882	0	5	0	5	4	5	21:36338779..36344707:+	ENSG00000159256
hsa_circ_0001883	0	0	0	0	3	0	21:36754180..36767285:-	ENSG00000159267
hsa_circ_0001884	0	3	0	4	2	2	21:37420299..37421866:+	ENSG00000157540
hsa_circ_0001885	0	0	0	0	2	0	21:37420299..37430400:+	ENSG00000157540
hsa_circ_0001886	0	0	0	3	5	0	21:37420299..37472880:+	ENSG00000157540
hsa_circ_0001887	0	0	0	5	6	0	21:39206108..39212707:-	ENSG00000185658
hsa_circ_0001888	0	0	0	3	0	0	21:39206108..39229436:-	ENSG00000185658
hsa_circ_0001889	0	0	0	0	0	4	21:39213481..39225197:-	ENSG00000185658
hsa_circ_0001890	0	0	0	4	3	0	21:39218152..39218660:-	ENSG00000185658
hsa_circ_0001891	0	0	0	0	0	3	21:39224408..39229436:-	ENSG00000185658
hsa_circ_0001892	0	0	0	0	2	0	21:39224408..39298582:-	ENSG00000185658
hsa_circ_0001893	0	0	0	2	3	0	21:39247701..39258672:-	ENSG00000185658
hsa_circ_0001894	0	0	0	3	0	0	21:41226266..41257326:+	ENSG00000182240
hsa_circ_0001895	0	0	0	0	2	3	21:41237513..41257326:+	ENSG00000182240
hsa_circ_0001896	0	0	0	3	0	0	21:43746079..43749080:+	ENSG00000160209
hsa_circ_0001897	0	0	0	0	0	4	21:43774658..43776269:-	ENSG00000160213
hsa_circ_0001898	0	0	0	0	7	0	21:44855210..44861271:-	ENSG00000183255
hsa_circ_0001899	0	2	0	0	6	15	21:45128402..45134832:+	ENSG00000197381
hsa_circ_0001900	0	0	0	0	5	0	21:45992010..45994229:+	ENSG00000142156
hsa_circ_0001901	0	0	0	2	0	0	21:45992059..45997442:-	ENSG00000142156
hsa_circ_0001902	0	0	0	0	0	2	21:46111566..46112021:-	ENSG00000142173
hsa_circ_0001903	2	0	0	0	6	4	21:46349012..46349820:+	ENSG00000160299
hsa_circ_0001904	0	0	5	0	0	0	21:8401636..8446098:-	Null
hsa_circ_0001905	0	0	0	0	0	3	22:17826454..17872854:-	Null
hsa_circ_0001906	0	0	0	2	0	0	22:17875447..17879402:-	ENSG00000243156
hsa_circ_0001907	0	0	0	0	8	0	22:20139194..20143756:+	ENSG00000099904
hsa_circ_0001908	0	0	0	0	0	2	22:20140617..20143756:+	ENSG00000099904
hsa_circ_0001909	0	0	0	0	2	0	22:20824326..20838731:-	ENSG00000241973
hsa_circ_0001910	0	2	0	3	4	9	22:20933779..20934244:+	ENSG00000099942
hsa_circ_0001911	0	0	0	0	2	0	22:22353111..22376059:+	Null
hsa_circ_0001912	0	0	0	3	0	0	22:22792696..22822866:+	Null
hsa_circ_0001913	0	4	0	0	0	0	22:24302195..24369320:+	ENSG00000258555,ENSG00000100014
hsa_circ_0001914	0	0	0	0	2	0	22:25661576..25674528:+	ENSG00000100077
hsa_circ_0001915	0	0	0	4	2	4	22:27894555..27914347:-	ENSG00000180957
hsa_circ_0001916	0	0	0	0	2	0	22:27910964..27914347:-	ENSG00000180957
hsa_circ_0001917	0	0	0	2	0	0	22:28163092..28163599:-	ENSG00000100154
hsa_circ_0001918	0	0	0	0	0	9	22:28296198..28297852:-	ENSG00000100154
hsa_circ_0001919	0	0	0	2	0	0	22:28514757..28519320:-	Null
hsa_circ_0001920	0	0	0	5	0	0	22:28514757..28545577:-	Null
hsa_circ_0001921	0	0	0	0	2	0	22:28844127..28846512:+	ENSG00000226471
hsa_circ_0001922	0	0	0	0	3	0	22:29636751..29642285:+	ENSG00000186575
hsa_circ_0001923	0	0	0	2	0	0	22:29970976..29979052:+	ENSG00000100330
hsa_circ_0001924	0	0	0	0	2	2	22:29978442..29998857:+	ENSG00000100330
hsa_circ_0001925	0	0	0	0	2	0	22:31095303..31097338:+	ENSG00000183963
hsa_circ_0001926	0	0	0	3	3	5	22:31097269..31099896:+	ENSG00000183963
hsa_circ_0001927	0	0	0	3	5	32	22:31097269..31104387:+	ENSG00000183963
hsa_circ_0001928	0	0	0	2	0	0	22:31810521..31815212:+	ENSG00000100150
hsa_circ_0001929	0	2	0	15	11	2	22:32478981..32479275:+	ENSG00000100225
hsa_circ_0001930	0	0	0	4	0	0	22:32478981..32485209:+	ENSG00000100225
hsa_circ_0001931	0	0	0	3	0	0	22:35610884..35611106:-	ENSG00000198125
hsa_circ_0001932	5	0	0	0	0	0	22:36300220..36300889:+	ENSG00000100345
hsa_circ_0001933	0	0	0	0	0	2	22:36932765..36933994:+	ENSG00000100368
hsa_circ_0001934	0	0	0	0	3	0	22:38245935..38248019:-	ENSG00000198792
hsa_circ_0001935	0	0	0	3	3	0	22:38494630..38501280:-	ENSG00000100201
hsa_circ_0001936	0	0	0	0	2	0	22:38498085..38498573:-	ENSG00000100201
hsa_circ_0001937	0	0	0	2	0	0	22:38498085..38501280:-	ENSG00000100201
hsa_circ_0001938	0	0	0	0	2	0	22:38499400..38501280:-	ENSG00000100201
hsa_circ_0001939	0	4	2	0	5	0	22:38962098..38991626:+	Null,ENSG00000128383
hsa_circ_0001940	0	0	0	0	2	0	22:39138636..39141436:-	ENSG00000100307
hsa_circ_0001941	0	4	0	0	0	0	22:40261832..40270280:+	ENSG00000100354
hsa_circ_0001942	0	0	0	0	2	0	22:40277077..40285770:+	ENSG00000100354
hsa_circ_0001943	0	0	0	0	2	0	22:40429606..40435554:-	ENSG00000196588
hsa_circ_0001944	0	3	0	0	2	0	22:40552106..40594735:-	ENSG00000196588
hsa_circ_0001945	0	2	0	0	0	2	22:40881770..40882177:+	ENSG00000196236
hsa_circ_0001946	0	0	0	0	3	0	22:41274600..41281082:-	ENSG00000100401
hsa_circ_0001947	0	0	2	0	0	0	22:41338313..41339191:+	ENSG00000100403
hsa_circ_0001948	0	0	0	2	0	4	22:41342529..41343576:+	ENSG00000100403
hsa_circ_0001949	0	0	0	0	2	0	22:41636113..41637791:+	ENSG00000196419
hsa_circ_0001950	3	0	0	0	6	3	22:41808875..41810291:+	ENSG00000100147
hsa_circ_0001951	0	0	0	3	3	0	22:41808875..41813822:+	ENSG00000100147
hsa_circ_0001952	0	0	0	0	7	0	22:42516011..42577098:-	Null
hsa_circ_0001953	0	0	0	3	8	4	22:42890947..42891182:-	ENSG00000100266
hsa_circ_0001954	0	0	0	3	6	3	22:43039780..43046573:-	ENSG00000100271
hsa_circ_0001955	0	0	0	2	2	2	22:45178238..45178900:+	ENSG00000093000
hsa_circ_0001956	0	0	0	0	0	4	22:45330603..45332710:+	ENSG00000100376
hsa_circ_0001957	0	0	0	0	0	2	22:45689712..45740538:+	ENSG00000130638
hsa_circ_0001958	0	0	0	5	3	0	22:45700282..45740538:+	ENSG00000130638
hsa_circ_0001959	0	0	0	7	10	5	22:45729425..45740538:+	ENSG00000130638
hsa_circ_0001960	0	0	0	3	3	9	22:45793545..45807022:+	ENSG00000130638
hsa_circ_0001961	0	0	3	0	0	0	22:46097926..46098558:+	ENSG00000197182
hsa_circ_0001962	2	0	0	0	0	0	22:46097926..46109908:+	ENSG00000197182
hsa_circ_0001963	0	0	0	0	2	0	22:46384543..46389499:-	ENSG00000075275
hsa_circ_0001964	0	2	0	0	0	0	22:46626751..46637960:+	ENSG00000075240
hsa_circ_0001965	0	0	0	2	0	0	22:49883334..49887420:+	ENSG00000100426
hsa_circ_0001966	0	0	0	0	2	0	22:50372020..50389111:+	ENSG00000100239,Null
hsa_circ_0001967	0	5	0	3	10	6	22:50372020..50394135:+	ENSG00000100239
hsa_circ_0001968	0	0	0	0	4	0	22:50684585..50722437:+	ENSG00000251322
hsa_circ_0001969	0	0	0	0	0	2	2:100904733..100937842:+	ENSG00000170485
hsa_circ_0001970	0	0	0	0	2	0	2:101257791..101262691:+	ENSG00000158435
hsa_circ_0001971	0	0	0	0	0	3	2:101257791..101265047:+	ENSG00000158435
hsa_circ_0001972	0	0	0	0	3	0	2:101281859..101295181:-	ENSG00000163162
hsa_circ_0001973	0	0	0	2	0	0	2:106145190..106166083:-	ENSG00000115652
hsa_circ_0001974	0	0	0	14	8	3	2:106158058..106166083:-	ENSG00000115652
hsa_circ_0001975	0	0	0	3	0	0	2:10659172..10668723:-	ENSG00000115761
hsa_circ_0001976	0	0	0	0	2	0	2:10788697..10789889:-	ENSG00000143870
hsa_circ_0001977	0	0	0	3	0	4	2:108771701..108773046:+	ENSG00000153201
hsa_circ_0001978	0	0	0	0	2	0	2:108791675..108805008:+	ENSG00000163006
hsa_circ_0001979	0	2	0	0	0	0	2:109553087..109593119:-	ENSG00000186522
hsa_circ_0001980	0	0	0	2	0	0	2:109564366..109565859:-	ENSG00000186522
hsa_circ_0001981	0	0	4	4	3	5	2:109564366..109593119:-	ENSG00000186522
hsa_circ_0001982	0	0	3	0	0	0	2:109585126..109585838:-	ENSG00000186522
hsa_circ_0001983	0	0	0	0	2	0	2:112064162..112067067:+	ENSG00000153214
hsa_circ_0001984	0	0	0	5	6	5	2:112299849..112300029:+	ENSG00000188177
hsa_circ_0001985	0	0	0	0	2	0	2:112299849..112325197:+	ENSG00000188177
hsa_circ_0001986	0	0	0	0	8	3	2:112299849..112332282:+	ENSG00000188177
hsa_circ_0001987	0	0	0	2	0	0	2:112502912..112503181:+	ENSG00000114999
hsa_circ_0001988	0	0	0	0	2	0	2:11286539..11287736:-	ENSG00000134318
hsa_circ_0001989	0	0	0	0	0	2	2:113729401..113735858:-	ENSG00000115084
hsa_circ_0001990	0	0	0	2	0	0	2:113916884..113942359:+	ENSG00000115091
hsa_circ_0001991	0	0	0	2	0	0	2:119877323..119885882:+	ENSG00000088179
hsa_circ_0001992	0	0	0	0	3	0	2:119881786..119885882:+	ENSG00000088179
hsa_circ_0001993	0	0	0	2	0	0	2:120073178..120078581:+	ENSG00000115109
hsa_circ_0001994	0	2	0	0	2	2	2:120127688..120175000:+	ENSG00000115109
hsa_circ_0001995	0	0	0	0	4	0	2:120127688..120175004:+	ENSG00000115109
hsa_circ_0001996	0	0	0	0	2	0	2:120160881..120175004:+	ENSG00000115109
hsa_circ_0001997	0	0	0	0	2	0	2:121457687..121458975:-	ENSG00000074054
hsa_circ_0001998	0	0	0	6	10	7	2:121605701..121606180:-	ENSG00000074054
hsa_circ_0001999	0	0	0	0	2	0	2:121757240..121761524:+	ENSG00000211460
[truncated: 1,660 more rows]
